# Supplementary material for: Spatiotemporal patterns and triggers of seismically detected rockfalls
Source: Copernicus journal article supplement (doi:10.5194/esurf-2017-20), 2017-04-12
Supplement: Supplementary file 1 [file esurf-2017-20-supplement.zip]

# Spatiotemporal patterns and triggers of seismically detected rockfalls – Supplementary material

Michael Dietze, Jens M. Turowski, Kristen L. Cook, Niels Hovius (GFZ Potsdam, Section 5.1 Geomorphology)

March 23, 2017

## 1 Explanations

This supplementary material contains a documentation of all 49 detected rockfall events from the article Spatiotemporal patterns and triggers of seismically detected rockfalls by Michael Dietze, Kristen L. Cook, Jens M. Turowski and Niels Hovius. The methods of data processing are explained in this main article. The supplementary material contains for all rockfall events the full set of timing, seismic processing setup and results as well as results of the trigger mechanism analysis.

Furthermore, for all events with a preceeding and posterior time window power spectral density estimates (PSD) were plotted. The PSDs were calculated from the vertical component of the most representative seismic station (denoted in the title), with signals deconvolved and filtered between 1 and 80 Hz. The PSDs are overlain by the waveform of the seismic data (semi transparent white line) and the onset of the rockfall event is indicated by a black square at the bottom of the figure. All data were processed with the R-package “eseis” version 0.3.1.

The raw seismic data (vertical components of all available stations) is provided as ASCII files with a buffer of 60 s before and after the event. The time stamp is given as POSIXct string. The files “seismic stations 2014.txt” and “seismic stations 2015.txt” contain information about station IDs, locations in UTM coordinates and sensor and logger types.

Table 1: Data table part 1. Rockfall event definitions, seismic STL-LTA-picking setup and localisation setup and metadata. ID is consecutive in time and links to 3 and the main article. Event start denotes rockfall initiation as detected from seismic data, given in UTC time. Duration<sub>picked</sub> is the event duration based on the STA-LTA-picking routine (cf. main article). Duration<sub>manual</sub> is the duration of a rockfall event from manual inspection of the seismic data. Variables  $f_{low}$  and  $f_{high}$  denote the filter frequency limits for localisation. Variables  $t_{pre}$  and  $t_{post}$  indicate additional time added to Event start and Duration<sub>manual</sub> for localisation to cover variability of all included signals. SNR<sub>station</sub> is the signal-to-noise ratio threshold that needed to be passed to allow localisation of an event. SNR<sub>1</sub> to SNR<sub>4</sub> are the resulting signal-to-noise ratios of the prepared data for localisation. SNR<sub>mean</sub> is the corresponding average signal-to-noise ratio.

| ID | Event start         | Duration <sub>picked</sub> (s) | Duration <sub>manual</sub> (s) | $f_{low}$ (Hz) | $f_{high}$ (Hz) | $t_{pre}$ (s) | $t_{post}$ (s) | SNR <sub>station</sub> | SNR <sub>1</sub> | SNR <sub>2</sub> | SNR <sub>3</sub> | SNR <sub>4</sub> | SNR <sub>mean</sub> |
|----|---------------------|--------------------------------|--------------------------------|----------------|-----------------|---------------|----------------|------------------------|------------------|------------------|------------------|------------------|---------------------|
| 1  | 08-06-2014-02:52:12 | 0.7                            | 8                              | 10             | 20              | 1             | 1              | 5                      | 20.1             | 19.6             | 8.5              | 6.7              | 13.7                |
| 2  | 08-06-2014-11:33:10 | 0.8                            | 6                              | 20             | 40              | 1             | 1              | 5                      | 55.9             | 19.5             | 16.9             | 24.8             | 29.3                |
| 3  | 08-18-2014-03:15:11 | 1.6                            | 5                              | 7              | 20              | 1             | 1              | 5                      | 27.5             | 13.1             | 13.4             | 4.7              | 14.7                |
| 4  | 08-19-2014-05:34:16 | 0.8                            | 2                              | 10             | 20              | 0             | 1              | 5                      | 11.6             | 10.2             | 3.7              | 16.2             | 10.4                |
| 5  | 08-26-2014-10:13:46 | 0.6                            | 3                              | 10             | 20              | 1             | 1              | 5                      | 22               | 0                | 14.2             | 10.8             | 11.7                |
| 6  | 08-29-2014-20:20:58 | 0.5                            | 2                              | 10             | 20              | 1             | 1              | 5                      | 29.2             | 7                | 10.3             | 10.5             | 14.3                |
| 7  | 09-02-2014-05:39:14 | 1.2                            | 1                              | 5              | 40              | 1             | 1              | 5                      | 28.7             | 32               | 6.1              | 10.3             | 19.3                |
| 8  | 09-25-2014-07:03:13 | 3                              | 6                              | 2.8            | 5.6             | 1             | 1              | 5                      | 10.3             | 12.4             | 7.5              | 19.9             | 12.5                |
| 9  | 10-01-2014-09:23:05 | 5                              | 10                             | 1              | 35              | 1             | 1              | 5                      | 21.2             | 34.7             | 10.4             | 13.5             | 19.9                |
| 10 | 10-02-2014-17:59:50 | 2.3                            | 4                              | 5              | 16              | 1             | 1              | 5                      | 17               | 8.8              | 7.3              | 15.1             | 12.1                |
| 11 | 10-12-2014-22:45:50 | 1.9                            | 1                              | 10             | 23              | 1             | 1              | 5                      | 26.5             | 8.6              | 8.9              | 12.1             | 14                  |
| 12 | 10-15-2014-01:58:32 | 1.1                            | 4                              | 11             | 21              | 1             | 1              | 5                      | 49.4             | 10.7             | 5.2              | 8.4              | 18.4                |
| 13 | 10-17-2014-00:09:25 | 6.8                            | 8                              | 4.7            | 15.2            | 1             | 1              | 5                      | 11.1             | 7.8              | 5.5              | 8.8              | 8.3                 |
| 14 | 10-20-2014-15:05:34 | 0.3                            | 7                              | 16             | 26              | 1             | 1              | 5                      | 55.9             | 15.9             | 14               | 22               | 26.9                |
| 15 | 10-20-2014-19:11:09 | 0.1                            | 5                              | 10             | 20              | 1             | 1              | 5                      | 35.8             | 10.7             | 12.1             | 13.9             | 18.1                |
| 16 | 10-22-2014-11:47:28 | 1.3                            | 2                              | 11             | 19.9            | 1             | 1              | 5                      | 7.3              | 8.9              | 5.7              | 11.9             | 8.5                 |
| 17 | 10-26-2014-20:08:45 | 0.8                            | 2                              | 7              | 13              | 1             | 1              | 5                      | 11.4             | 6                | 8.9              | 14.2             | 10.1                |
| 18 | 03-19-2015-01:34:06 | 1.4                            | 2                              | 5              | 8               | 1             | 1              | 5                      | 9.9              | 14               | 6.5              | 6.2              | 9.1                 |
| 19 | 03-19-2015-06:20:04 | 1.2                            | 2                              | 5              | 15              | 2             | 2              | 5                      | 30.5             | 41.7             | 33.3             | 25.3             | 32.7                |
| 20 | 03-19-2015-08:23:53 | 2.3                            | 2                              | 10             | 30              | 2             | 2              | 5                      | 53.9             | 68               | 44.9             | 36.9             | 50.9                |
| 21 | 03-19-2015-14:58:02 | 2.3                            | 2                              | 5              | 15              | 2             | 2              | 5                      | 52.3             | 53.8             | 34.1             | 18.7             | 39.7                |
| 22 | 03-20-2015-00:31:17 | 1                              | 2                              | 5              | 15              | 2             | 2              | 5                      | 18.6             | 14.9             | 7.3              | 16.4             | 14.3                |
| 23 | 03-21-2015-18:25:47 | 1.3                            | 2                              | 10             | 20              | 2             | 2              | 5                      | 12.1             | 25.8             | 5.6              | 13               | 14.1                |
| 24 | 03-21-2015-18:30:49 | 0.9                            | 2                              | 5              | 15              | 2             | 2              | 5                      | 15.9             | 53.1             | 9.1              | 24               | 25.5                |
| 25 | 03-25-2015-19:01:54 | 0.5                            | 2                              | 10             | 20              | 2             | 2              | 5                      | 22.9             | 31.1             | 4.9              | 22.9             | 20.4                |
| 26 | 03-27-2015-04:49:21 | 1                              | 2                              | 5              | 15              | 2             | 2              | 5                      | 21.3             | 12.5             | 12               | 8                | 13.5                |
| 27 | 03-31-2015-05:53:25 | 2.1                            | 3                              | 10             | 30              | 2             | 2              | 5                      | 21               | 11.1             | 12.6             | 12               | 14.2                |
| 28 | 03-31-2015-06:03:31 | 1.9                            | 3                              | 5              | 15              | 2             | 5              | 5                      | 12.6             | 32.6             | 6.9              | 6.8              | 14.7                |
| 29 | 03-31-2015-18:59:27 | 1                              | 1                              | 10             | 30              | 1             | 2              | 5                      | 9.3              | 50               | 9.2              | 21.4             | 22.5                |
| 30 | 04-06-2015-13:22:42 | 10.4                           | 10                             | 5              | 15              | 2             | 2              | 5                      | 71.7             | 73.5             | 67.7             | 17.8             | 57.7                |
| 31 | 04-07-2015-10:12:44 | 1.6                            | 2                              | 10             | 20              | 2             | 2              | 5                      | 22.3             | 49.2             | 29.3             | 17.9             | 29.7                |
| 32 | 04-07-2015-14:01:54 | 0.9                            | 1                              | 5              | 15              | 2             | 2              | 5                      | 24.4             | 31.8             | 15.8             | 10.7             | 20.7                |
| 33 | 04-08-2015-01:54:39 | 2.2                            | 2                              | 5              | 15              | 8             | 9              | 5                      | 54.7             | 62.3             | 63.9             | 34.1             | 53.8                |
| 34 | 04-08-2015-20:31:14 | 1.7                            | 2                              | 5              | 15              | 2             | 2              | 5                      | 9.5              | 12.7             | 11.9             | 7.2              | 10.3                |
| 35 | 04-09-2015-00:25:57 | 1.2                            | 2                              | 10             | 30              | 4             | 8              | 5                      | 51.3             | 66               | 7.7              | 23               | 37                  |
| 36 | 04-17-2015-08:32:20 | 4                              | 4                              | 10             | 20              | 2             | 2              | 5                      | 14               | 10.2             | 9.7              | 6                | 10                  |
| 37 | 04-17-2015-11:16:25 | 3.2                            | 4                              | 5              | 15              | 2             | 2              | 5                      | 50.2             | 40               | 19.6             | 17.6             | 31.8                |
| 38 | 04-18-2015-01:21:03 | 1                              | 1                              | 3              | 5               | 3             | 1              | 5                      | 13               | 9.8              | 11.9             | 22.2             | 14.2                |
| 39 | 04-18-2015-03:17:35 | 1.2                            | 1                              | 5              | 15              | 2             | 2              | 5                      | 32.9             | 25.5             | 13.6             | 9.7              | 20.4                |
| 40 | 04-18-2015-11:54:39 | 2.4                            | 3                              | 10             | 30              | 2             | 2              | 5                      | 20.7             | 13.8             | 6.5              | 19.6             | 15.1                |
| 41 | 04-18-2015-16:05:14 | 0.7                            | 1                              | 6              | 15              | 2             | 0              | 6                      | 5.8              | 14.2             | 7.3              | 8.8              | 9                   |
| 42 | 04-21-2015-06:48:50 | 2                              | 3                              | 20             | 40              | 6             | 15             | 5                      | 15.3             | 18.1             | 17.4             | 10.9             | 15.4                |
| 43 | 04-24-2015-17:04:35 | 1.7                            | 2                              | 10             | 20              | 2             | 2              | 5                      | 16.5             | 52.2             | 33.3             | 10.1             | 28                  |
| 44 | 04-27-2015-06:23:42 | 1.5                            | 2                              | 4              | 15              | 2             | 5              | 4                      | 17.4             | 6.3              | 60.7             | 8.2              | 23.1                |
| 45 | 05-07-2015-06:57:21 | 1.5                            | 2                              | 10             | 30              | 2             | 2              | 5                      | 11.4             | 41.1             | 50.2             | 7.8              | 27.6                |
| 46 | 05-08-2015-07:41:44 | 1                              | 1                              | 10             | 20              | 2             | 2              | 5                      | 19.8             | 39.9             | 14               | 19.1             | 23.2                |
| 47 | 05-10-2015-18:07:26 | 5                              | 5                              | 10             | 30              | 2             | 2              | 5                      | 28.1             | 36.4             | 6.2              | 19.4             | 22.5                |
| 48 | 05-13-2015-17:38:30 | 2.7                            | 3                              | 5              | 15              | 2             | 2              | 5                      | 26.7             | 10.1             | 7.5              | 7.4              | 12.9                |
| 49 | 05-29-2015-15:05:52 | 2.1                            | 4                              | 10             | 20              | 2             | 4              | 5                      | 10.3             | 20.3             | 12.6             | 18.8             | 15.5                |

Table 2: Data table part 2. Rockfall event localisation results, rockfall-associated seismic signals and trigger characteristics. ID corresponds to 1.  $X_{seismic}$ ,  $Y_{seismic}$  and  $Z_{seismic}$  are the cartesian coordinates of the pixel with the highest seismic source location probability density  $P_{max}$ .  $Z_{lidar}$  (m asl.) is the rockfall detachment height based on the lidar study by Dietze et al. (NHES). Type denotes rockfall evolutionary type (cf. main article).  $Event_{pre}$  and  $Event_{post}$  indicate the time lag to previous and posterior seismic signals that could be attributed to rockfall activity. Location is a descriptive classification of the impact area of the rockmass based on the location estimates and fall times.  $P_{cum}$  is the cumulative precipitation amount prior to a rockfall event.  $Lag_P$  (h) is the time lag between a rainfall event and a subsequent rockfall.  $Lag_{FT}$  (h) is the time lag between a freeze-thaw or thaw-freeze event and the subsequent rockfall.  $Lag_{quake}$  (h) is the time lag between a picked earthquake and a subsequent rockfall. Note that for the latter only data from 2015 was screened.

| ID | $X_{seismic}$ (m) | $Y_{seismic}$ (m) | $Z_{seismic}$ (m asl.) | $Z_{lidar}$ (m asl.) | Type | $Event_{pre}$ (s) | $Event_{post}$ (s) | Location | $P_{cum}$ (mm) | $Lag_P$ (h) | $Lag_{FT}$ (h) | $Lag_{quake}$ (h) |
|----|-------------------|-------------------|------------------------|----------------------|------|-------------------|--------------------|----------|----------------|-------------|----------------|-------------------|
| 1  | 415495            | 5156621           | 1096                   | NA                   | A    | NA                | NA                 | cliff    | 6.2            | 26.9        | NA             | NA                |
| 2  | 416035            | 5158531           | 1085                   | NA                   | A    | NA                | 0.9                | cliff    | 6.2            | 35.6        | NA             | NA                |
| 3  | 415485            | 5156861           | 1240                   | NA                   | B    | NA                | NA                 | cliff    | 1.2            | 34.3        | NA             | NA                |
| 4  | 415855            | 5157551           | 1088                   | NA                   | B    | NA                | 1.5                | cliff    | 6              | 0.6         | NA             | NA                |
| 5  | 416025            | 5158561           | 1064                   | NA                   | B    | 3.7               | 1.6                | cliff    | 36.2           | 0.2         | NA             | NA                |
| 6  | 416015            | 5158471           | 1089                   | NA                   | A    | 1.6               | 1.6                | cliff    | 4              | 0.3         | NA             | NA                |
| 7  | 415465            | 5156501           | 1119                   | NA                   | B    | 3.9               | NA                 | cliff    | 8.8            | 22.7        | NA             | NA                |
| 8  | 416015            | 5157781           | 918                    | 1005                 | B    | NA                | 10.3               | cliff    | 2.2            | 6.1         | NA             | NA                |
| 9  | 416115            | 5158701           | 916                    | 984                  | C    | NA                | NA                 | cliff    | 3.2            | 19.4        | NA             | NA                |
| 10 | 415975            | 5158271           | 1186                   | 1108                 | B    | NA                | NA                 | cliff    | 3.2            | 52.0        | NA             | NA                |
| 11 | 415485            | 5156561           | 1089                   | 1064                 | A    | NA                | NA                 | cliff    | 1              | 167.8       | NA             | NA                |
| 12 | 415505            | 5156541           | 1036                   | 1018                 | A    | NA                | NA                 | cliff    | 0.2            | 2.0         | NA             | NA                |
| 13 | 416065            | 5158811           | 1127                   | 1218                 | C    | NA                | NA                 | cliff    | 1.6            | 7.2         | NA             | NA                |
| 14 | 415505            | 5156871           | 1198                   | 1104                 | B    | NA                | NA                 | cliff    | 3.4            | 79.1        | NA             | NA                |
| 15 | 415515            | 5156841           | 1177                   | 954                  | B    | NA                | 4.3                | cliff    | 3.4            | 83.2        | NA             | NA                |
| 16 | 415635            | 5156991           | 1016                   | 955                  | A    | NA                | NA                 | cliff    | 4.2            | 0.8         | 12.8           | NA                |
| 17 | 416015            | 5157891           | 919                    | 994                  | B    | NA                | 1.8                | cliff    | 4              | 25.1        | 68.1           | NA                |
| 18 | 415885            | 5158261           | 1442                   | NA                   | A    | 3.4               | 4.7                | cliff    | 0.2            | 335.6       | 89.6           | NA                |
| 19 | 415795            | 5157441           | 1293                   | NA                   | A    | 1.4               | NA                 | cliff    | 0.2            | 340.3       | 94.3           | 2.6               |
| 20 | 416045            | 5158751           | 1252                   | NA                   | A    | 5.4               | NA                 | cliff    | 0.2            | 342.4       | 96.4           | 4.7               |
| 21 | 415605            | 5157571           | 1533                   | NA                   | A    | NA                | NA                 | top      | 0.2            | 349.0       | 103.0          | 11.3              |
| 22 | 416015            | 5158481           | 1112                   | NA                   | B    | NA                | 2.5                | cliff    | 0.2            | 358.5       | 112.5          | 0.5               |
| 23 | 415935            | 5158181           | 1328                   | NA                   | B    | NA                | 1.2                | cliff    | 3              | 0.4         | 2.4            | 12.3              |
| 24 | 415835            | 5157511           | 1300                   | NA                   | A    | NA                | NA                 | cliff    | 3              | 0.5         | 2.5            | 12.4              |
| 25 | 415955            | 5157971           | 1240                   | NA                   | B    | NA                | 2.1                | cliff    | 1.8            | 0.0         | 1.0            | 5.3               |
| 26 | 416065            | 5158871           | 1300                   | NA                   | B    | NA                | 1.8                | cliff    | 4              | 0.8         | 34.8           | 1.9               |
| 27 | 415485            | 5157301           | 1635                   | NA                   | C    | NA                | NA                 | top      | 22.2           | 1.9         | 70.9           | 0.4               |
| 28 | 415865            | 5157641           | 1148                   | NA                   | C    | NA                | NA                 | cliff    | 22.2           | 2.1         | 71.1           | 0.6               |
| 29 | 415955            | 5158231           | 1219                   | NA                   | B    | 0.5               | NA                 | cliff    | 0.6            | 1.0         | 84.0           | 0.5               |
| 30 | 415795            | 5157451           | 1318                   | NA                   | A    | 1.5               | 1.2                | cliff    | 0.2            | 24.4        | 52.4           | 0.1               |
| 31 | 415985            | 5158061           | 1169                   | NA                   | A    | NA                | 5.4                | cliff    | 0.2            | 45.2        | 73.2           | 9.1               |
| 32 | 415805            | 5157451           | 1293                   | NA                   | A    | NA                | 8.4                | cliff    | 0.2            | 49.0        | 3.0            | 12.9              |
| 33 | 415965            | 5158271           | 1208                   | NA                   | A    | 3.6               | NA                 | cliff    | 0.2            | 60.9        | 9.9            | 24.8              |
| 34 | 415485            | 5156431           | 986                    | NA                   | B    | NA                | 21                 | base     | 0.2            | 79.5        | 14.5           | 4.6               |
| 35 | 415935            | 5158201           | 1354                   | NA                   | B    | 3.1               | 12.4               | cliff    | 0.2            | 83.4        | 18.4           | 8.5               |
| 36 | 416015            | 5158591           | 1237                   | NA                   | C    | NA                | NA                 | cliff    | 0.2            | 283.5       | 218.5          | 3.7               |
| 37 | 416015            | 5158541           | 1266                   | NA                   | B    | 1.2               | 8.4                | cliff    | 1              | 2.3         | 221.3          | 0.8               |
| 38 | 416055            | 5157991           | 866                    | NA                   | C    | NA                | NA                 | base     | 5.6            | 0.4         | 235.4          | 3.5               |
| 39 | 416015            | 5158641           | 1218                   | NA                   | A    | NA                | NA                 | cliff    | 8.2            | 0.3         | 237.3          | 0.0               |
| 40 | 416005            | 5158021           | 1094                   | NA                   | C    | NA                | NA                 | cliff    | 0.2            | 6.9         | 245.9          | 2.1               |
| 41 | 415645            | 5157451           | 1453                   | NA                   | A    | NA                | 0.1                | top      | 0.2            | 3.1         | 250.1          | 2.4               |
| 42 | 416135            | 5159011           | 1229                   | NA                   | C    | NA                | NA                 | cliff    | 0.2            | 65.8        | 50.8           | 0.3               |
| 43 | 415555            | 5157161           | 1553                   | NA                   | A    | NA                | 3.4                | top      | 0.2            | 148.1       | 133.1          | 1.5               |
| 44 | 415935            | 5158191           | 1332                   | NA                   | C    | NA                | NA                 | cliff    | 0.4            | 30.4        | 194.4          | 0.2               |
| 45 | 415615            | 5156941           | 1006                   | NA                   | B    | 0.8               | 3.2                | base     | 6.4            | 23.0        | 193.0          | 0.3               |
| 46 | 416205            | 5159341           | 879                    | NA                   | B    | NA                | NA                 | base     | 6.4            | 47.7        | 217.7          | 1.8               |
| 47 | 415965            | 5157731           | 970                    | NA                   | C    | NA                | NA                 | base     | 0.4            | 25.1        | 276.1          | 1.0               |
| 48 | 416005            | 5158021           | 1094                   | NA                   | C    | NA                | NA                 | cliff    | 0.4            | 96.6        | 347.6          | 0.8               |
| 49 | 415945            | 5157941           | 1221                   | NA                   | A    | NA                | NA                 | cliff    | 2              | 60.1        | 179.1          | 35.4              |

Table 3: Data table part 3. Additional information from descriptive seismic analysis. IDs correspond to previous two tables.

| ID | Comment                                                                                                                    |
|----|----------------------------------------------------------------------------------------------------------------------------|
| 1  | no other signals visible                                                                                                   |
| 2  | helicopter passing by during event and 10 to 7 minutes before                                                              |
| 3  | small earthquake about 7 minutes before                                                                                    |
| 4  | rain drop impacts throughout all stations                                                                                  |
| 5  | rain drop impacts throughout all stations, helicopter passing by 35 minutes before                                         |
| 6  | rain drop impacts predominantly at upper stations                                                                          |
| 7  | helicopter passing by 10 to 3 minutes before, unknown source about 2 minutes before event, more prominent at Gate of China |
| 8  | explosion preceeding event by 6 minutes                                                                                    |
| 9  | train passage about 5 minutes before and 1 minute after event                                                              |
| 10 | train passage about 12 minutes before and one minute after event                                                           |
| 11 | no other signals visible                                                                                                   |
| 12 | slight rain event 10 to 5 minutes before                                                                                   |
| 13 | no other signals visible                                                                                                   |
| 14 | helicopter passing by a few minutes before and after the event                                                             |
| 15 | no other signals visible                                                                                                   |
| 16 | unidentifiable broadband (10 to 80 Hz) signal pulses before and after the event                                            |
| 17 | no other signals visible                                                                                                   |
| 18 | two weak signals (20-80 Hz) visible some minutes before event                                                              |
| 19 | train passage about 6 minutes before and 2 minutes after event                                                             |
| 20 | helicopter passing by about 10 to 5 minutes before event                                                                   |
| 21 | rain noise about 4 minutes before event                                                                                    |
| 22 | no other signals visible                                                                                                   |
| 23 | High frequent (30-80 Hz) short pulse (only visible at that closest station) about 2 minutes before event                   |
| 24 | Preceding rockfall (ID 23) visible 5 minutes before                                                                        |
| 25 | rain drop impacts throughout all stations                                                                                  |
| 26 | Weak 10-80 Hz signal period about 4 minutes before event                                                                   |
| 27 | Air-traveled signal about three minutes before event                                                                       |
| 28 | Significant blasting signals 15 to 3 minutes before event                                                                  |
| 29 | rain drop impacts throughout all stations                                                                                  |
| 30 | Earthquake about 3 minutes before                                                                                          |
| 31 | Train passage about 5 minutes before, remobilisation of debris 2 minutes after rockfall (only visible at Funny Rain)       |
| 32 | no other signals visible                                                                                                   |
| 33 | only minor local short pulses of energy visible                                                                            |
| 34 | no other signals visible                                                                                                   |
| 35 | rockfall outside monitored area about 20 minutes before                                                                    |
| 36 | helicopter passed 10 minutes before, raindrop impacts all the time, constant signal around 40 Hz 6-1 minutes before        |
| 37 | helicopter passage about 10 minutes before, low frequent activity at Funny Rain one minute before                          |
| 38 | rain drop impacts at all cliff top stations                                                                                |
| 39 | rain drop impacts at all cliff top stations                                                                                |
| 40 | rain drop impacts at all cliff top stations                                                                                |
| 41 | rain drop impacts at all cliff top stations, increasing signal content around 5 Hz                                         |
| 42 | abundant avalanche-like signals also before but only visible at Funny Rain                                                 |
| 43 | short pulses about 20 s before, only visible at Sweaty Herbs and Gate of China                                             |
| 44 | no other signals visible                                                                                                   |
| 45 | helicopter passage about 8 minutes before                                                                                  |
| 46 | helicopter passage 5 minutes before and after event                                                                        |
| 47 | low frequent pulse about 30 s before                                                                                       |
| 48 | multiple pulses of anthropogenic origin, rockfall is short pulse with sharp onset                                          |
| 49 | no other signals visible                                                                                                   |



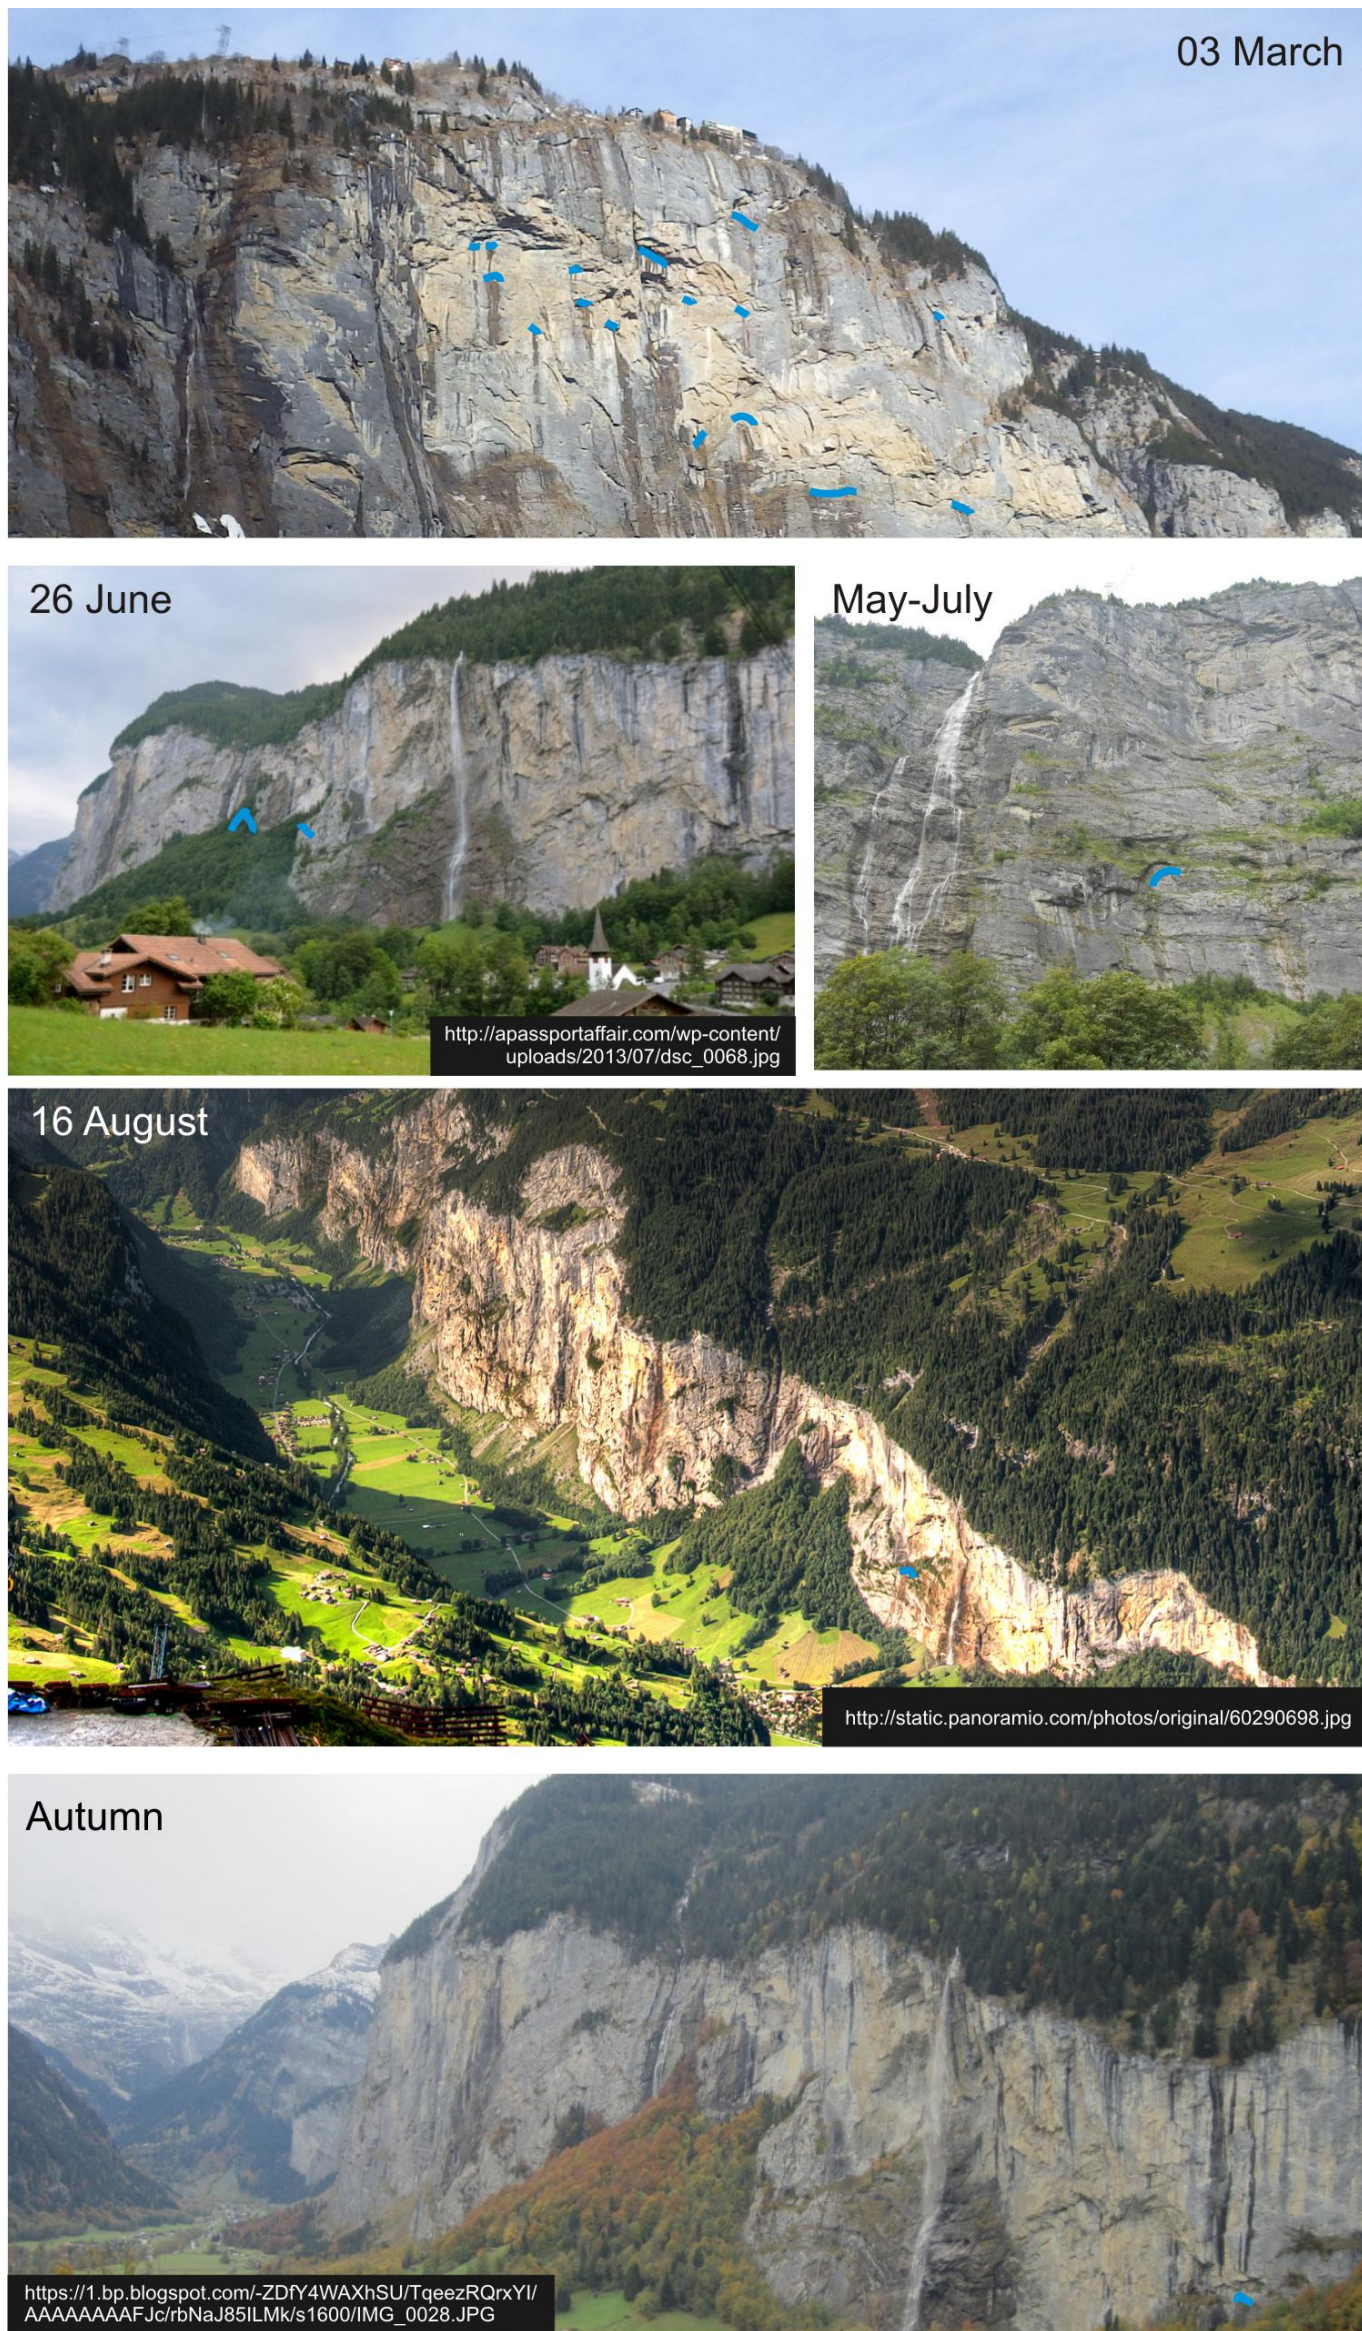

Figure 1: Images from selected seasons of sections of the east facing rock wall of the Lauterbrunnen Vally from internet rechereche. Blue lines indicate identified water outlets that are not linked to waterfall spray or input from hanging valleys. Images without reference were taken from the authors personally.



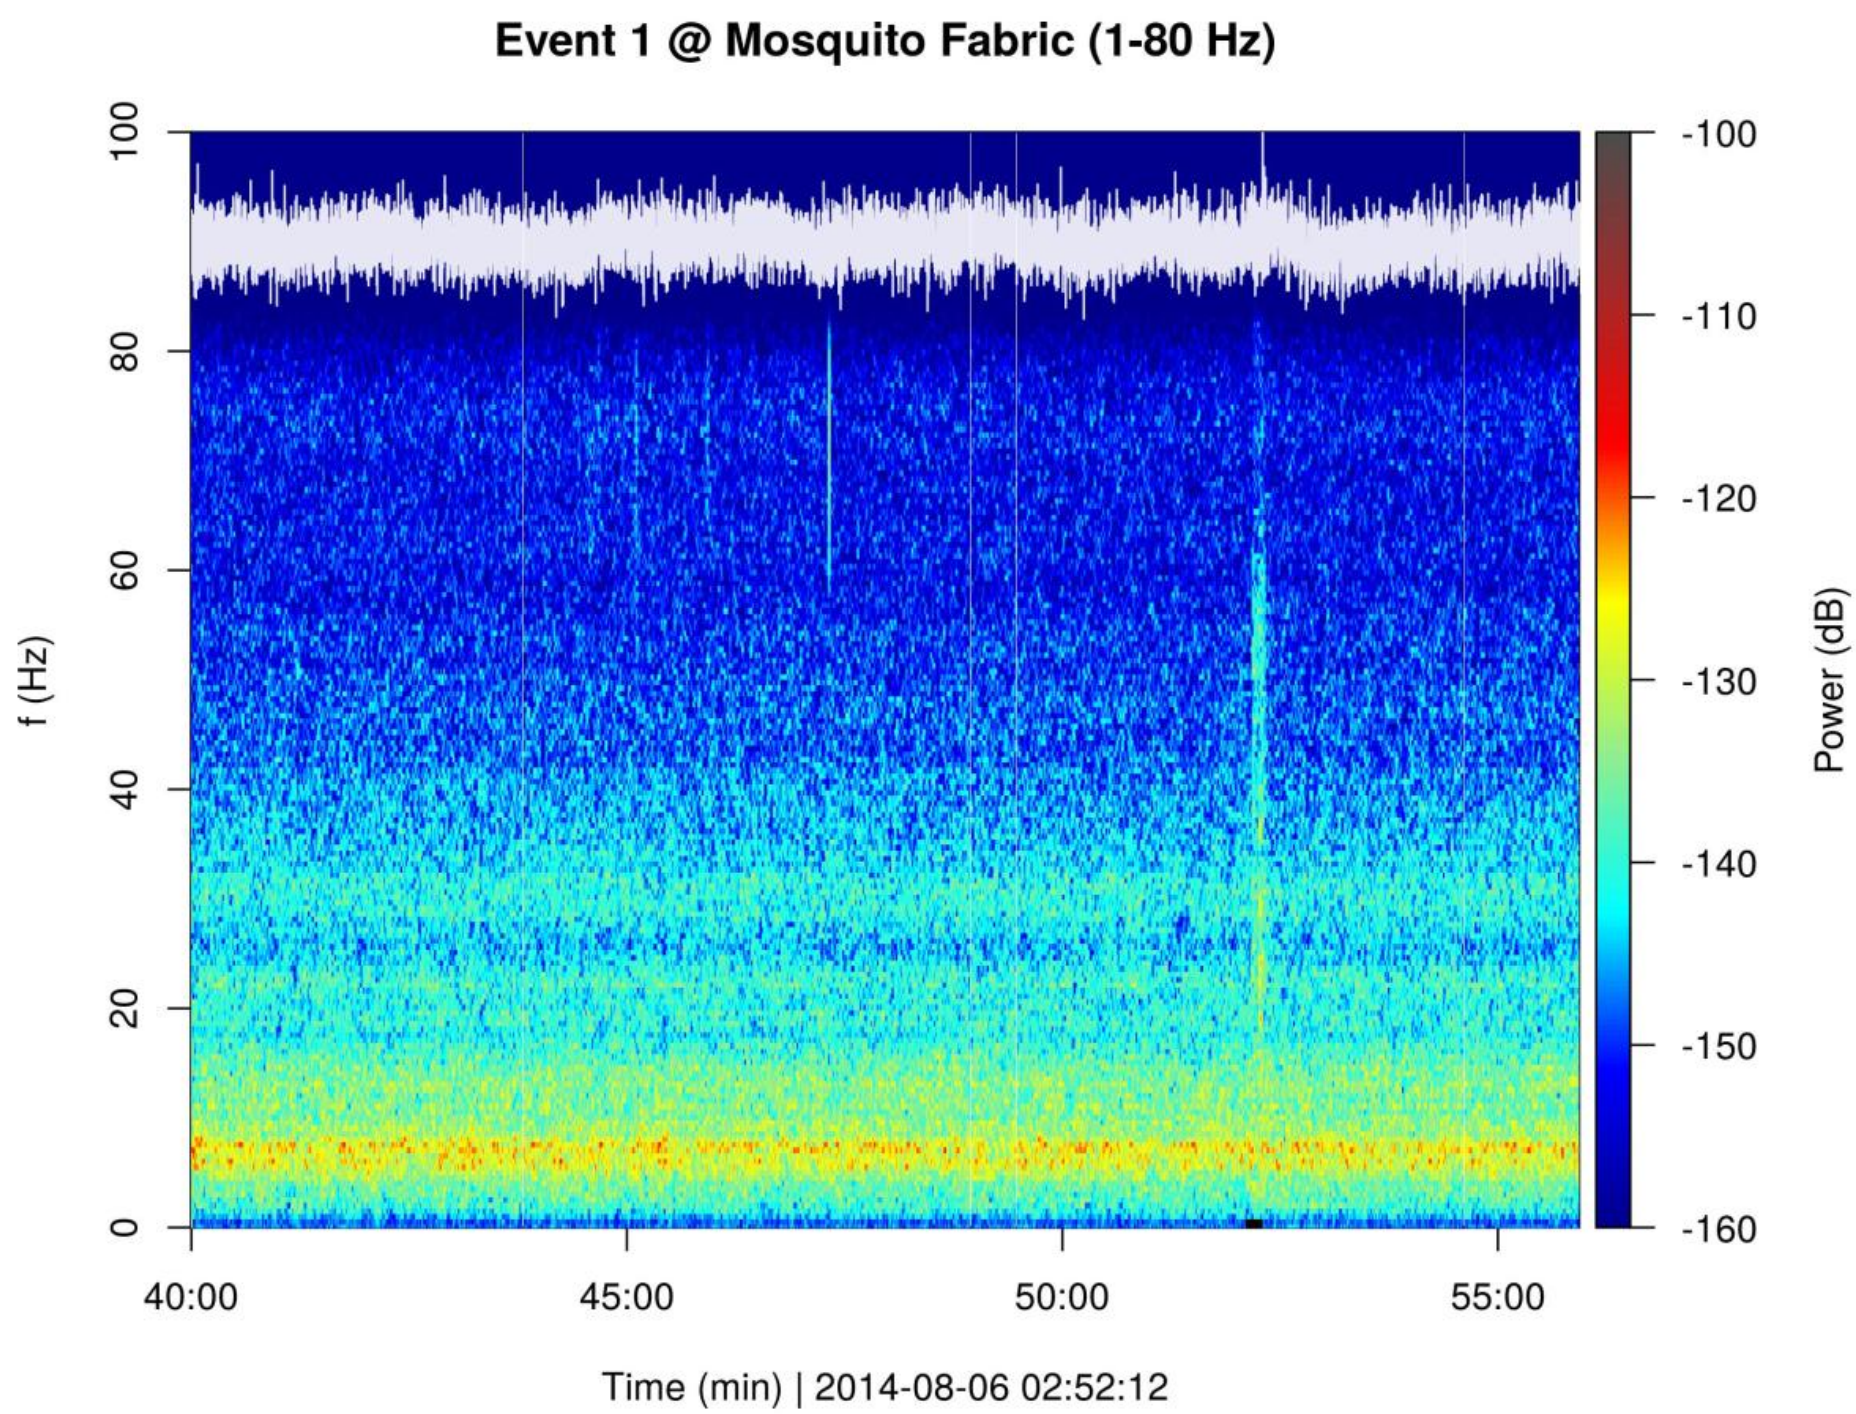

Figure 2:



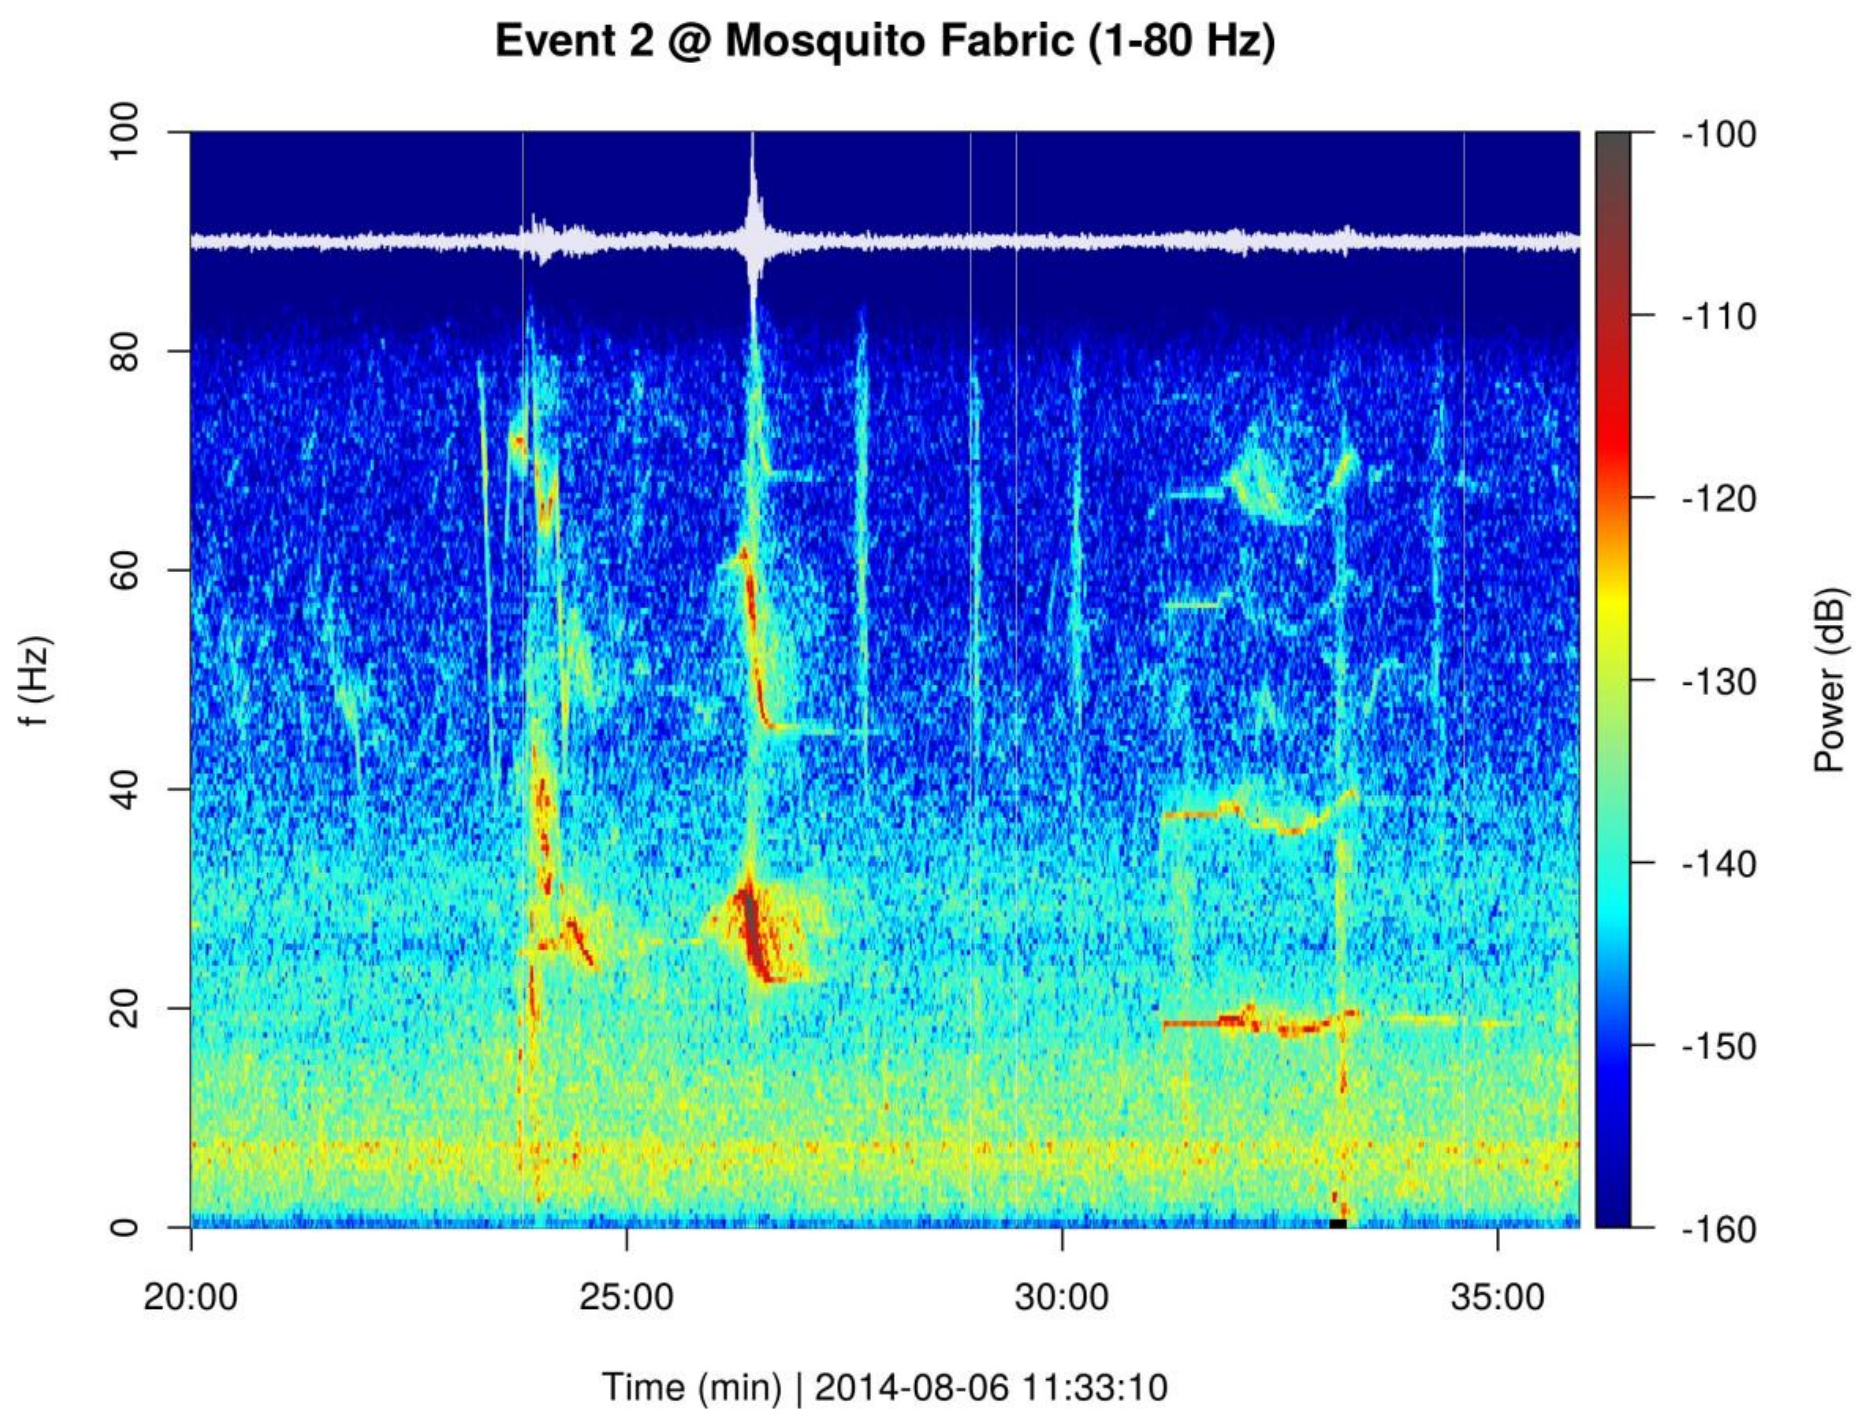

Figure 3:



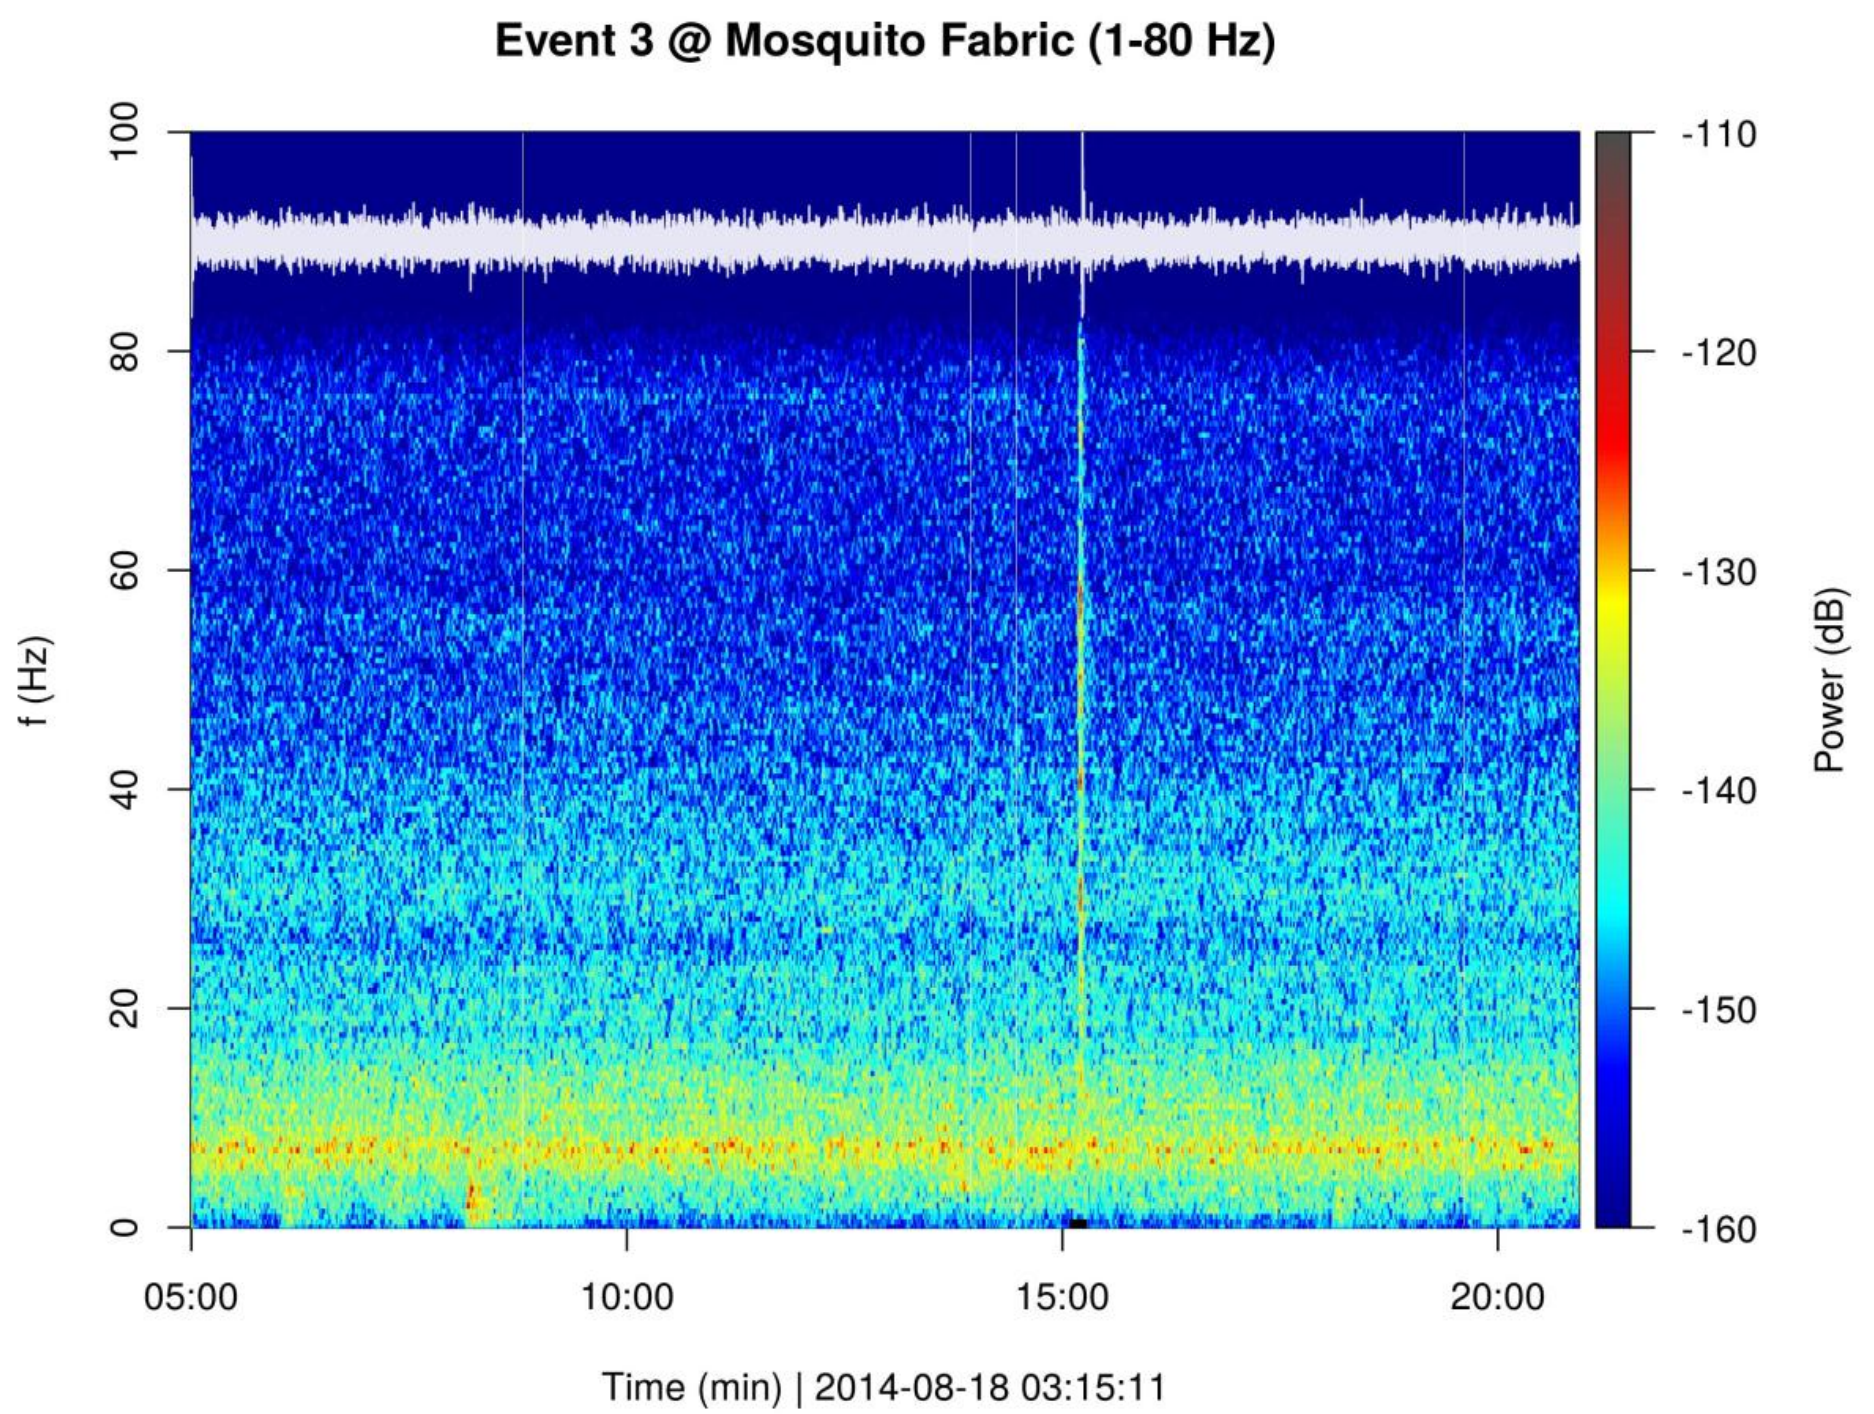

Figure 4:



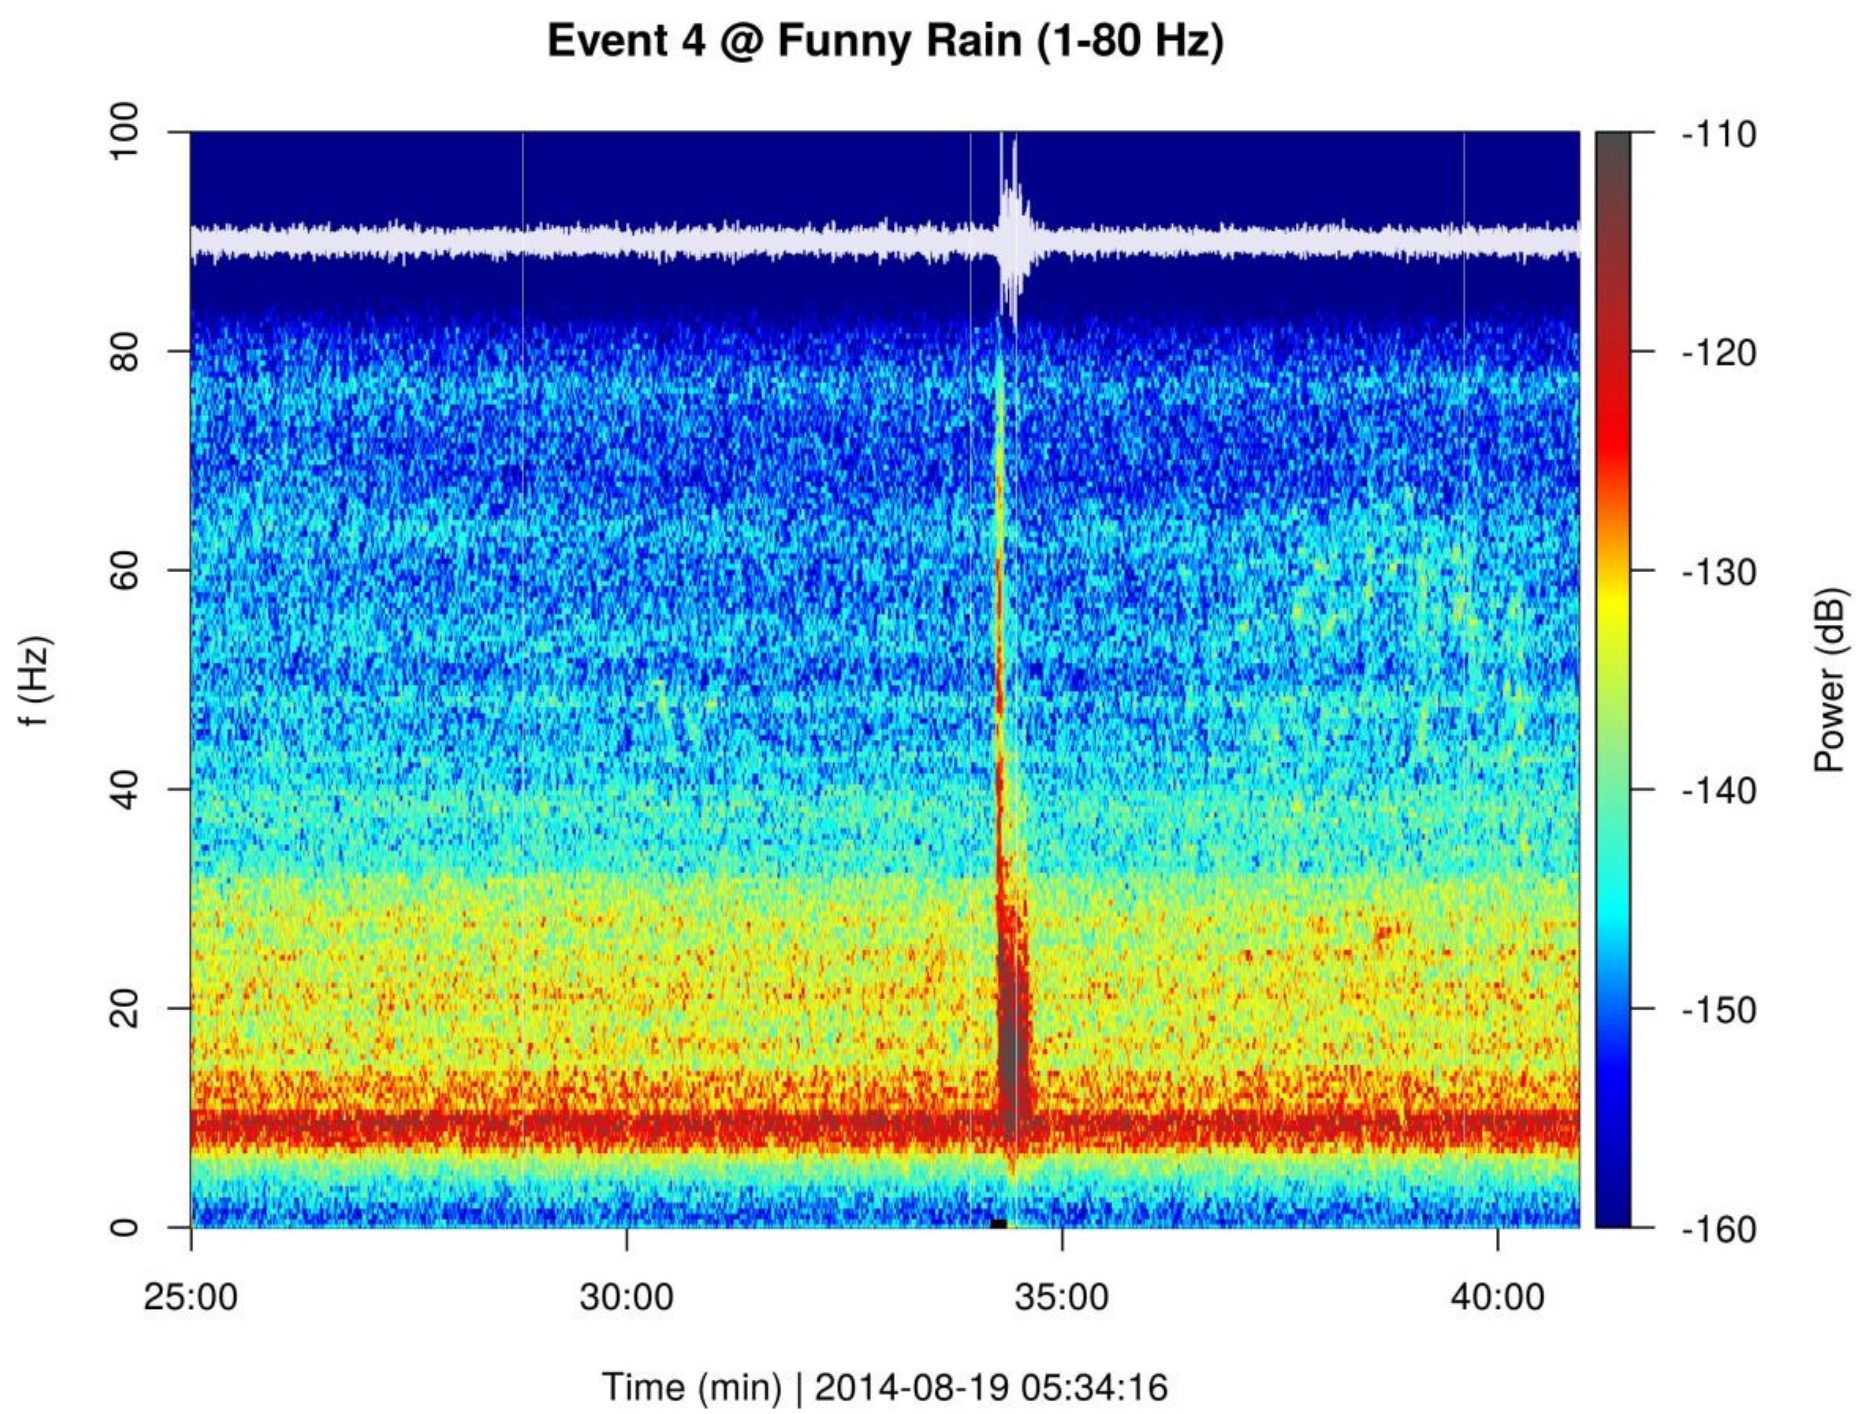

Figure 5:



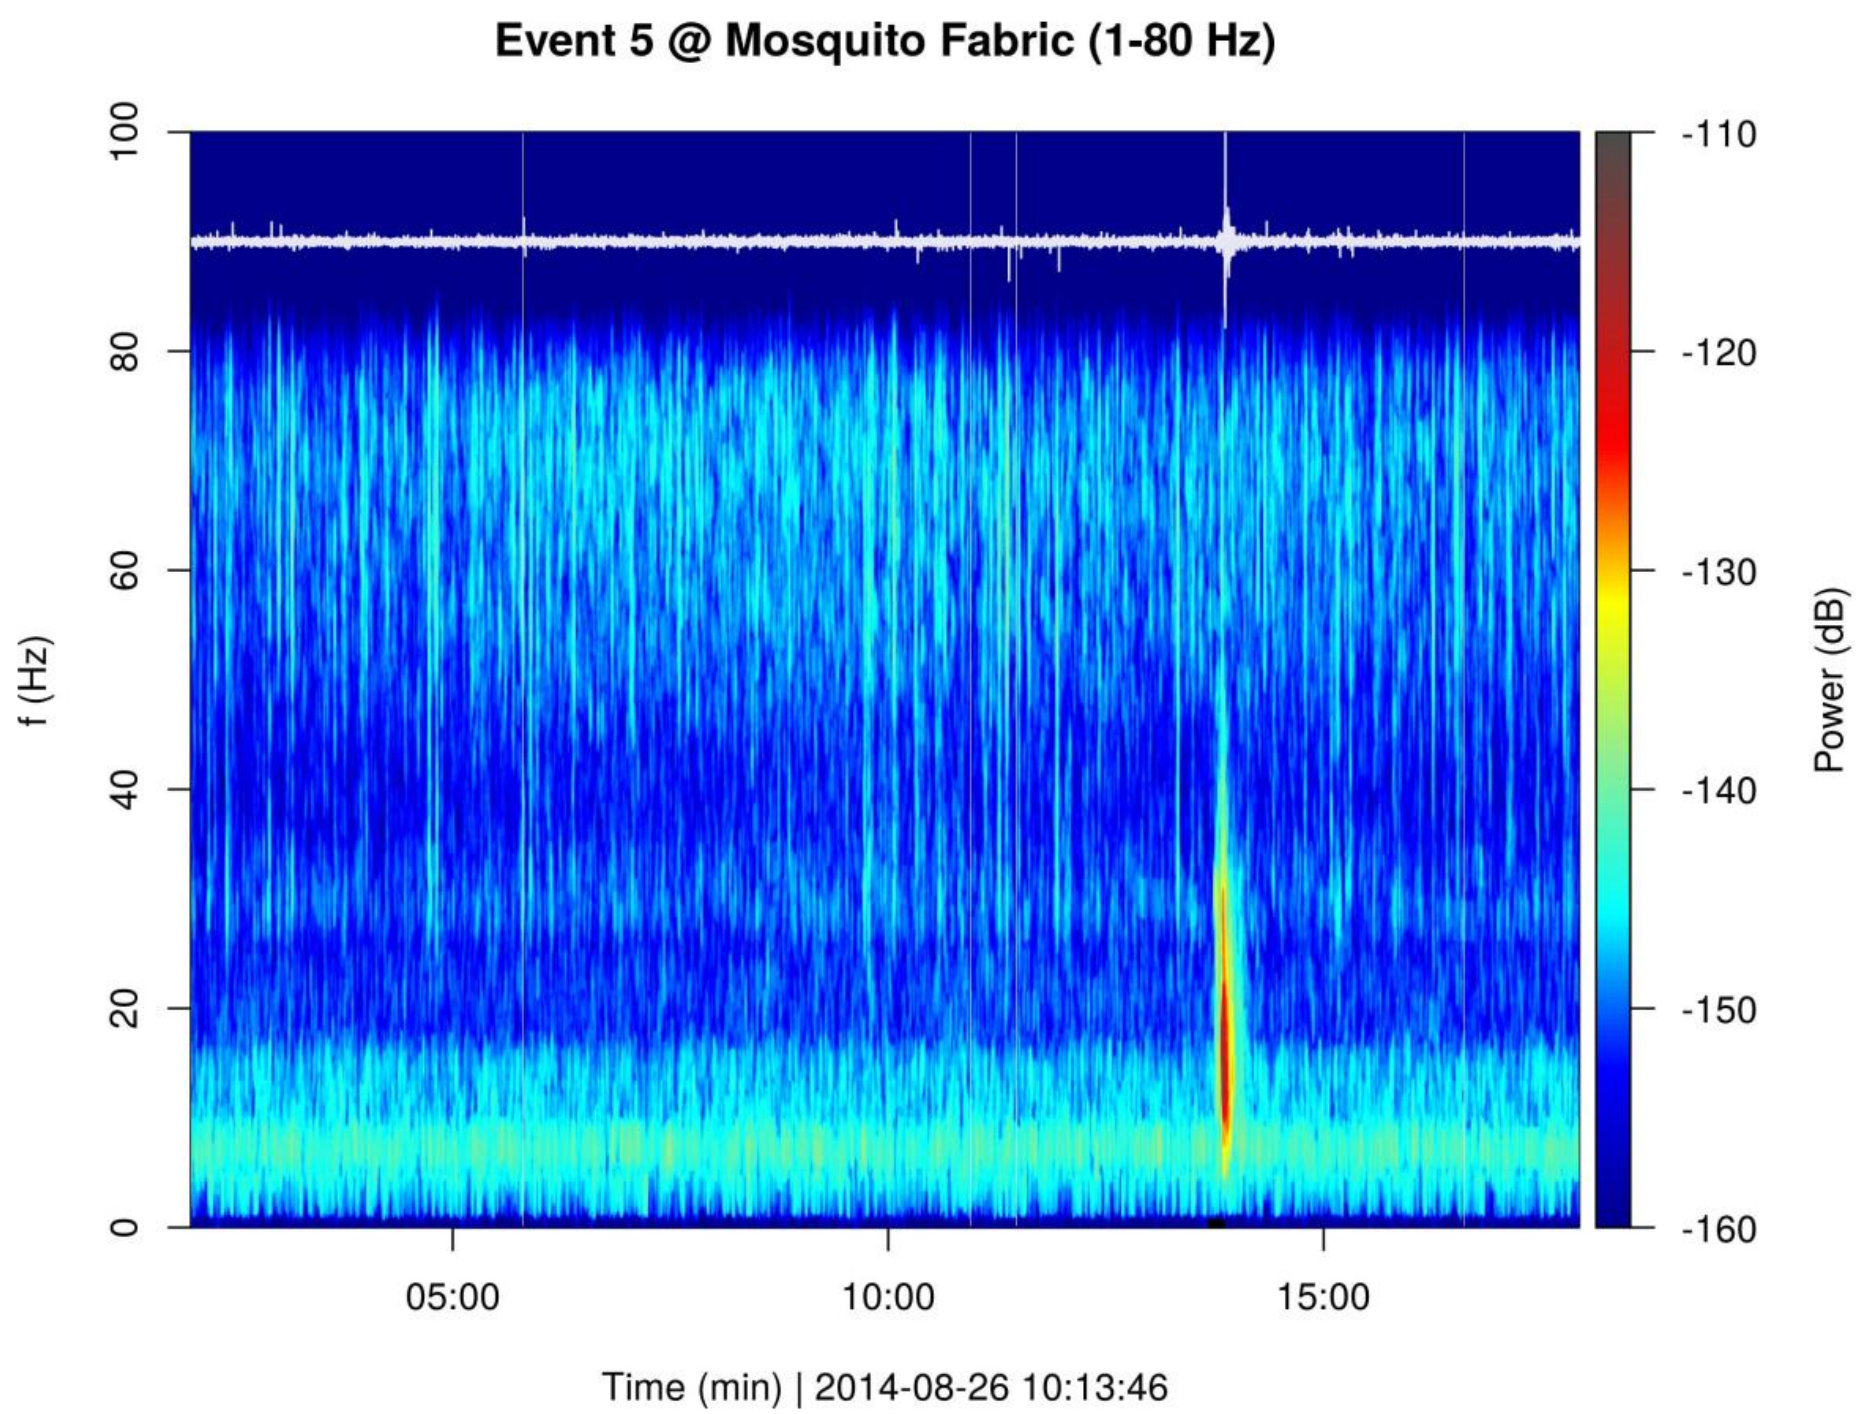

Figure 6:

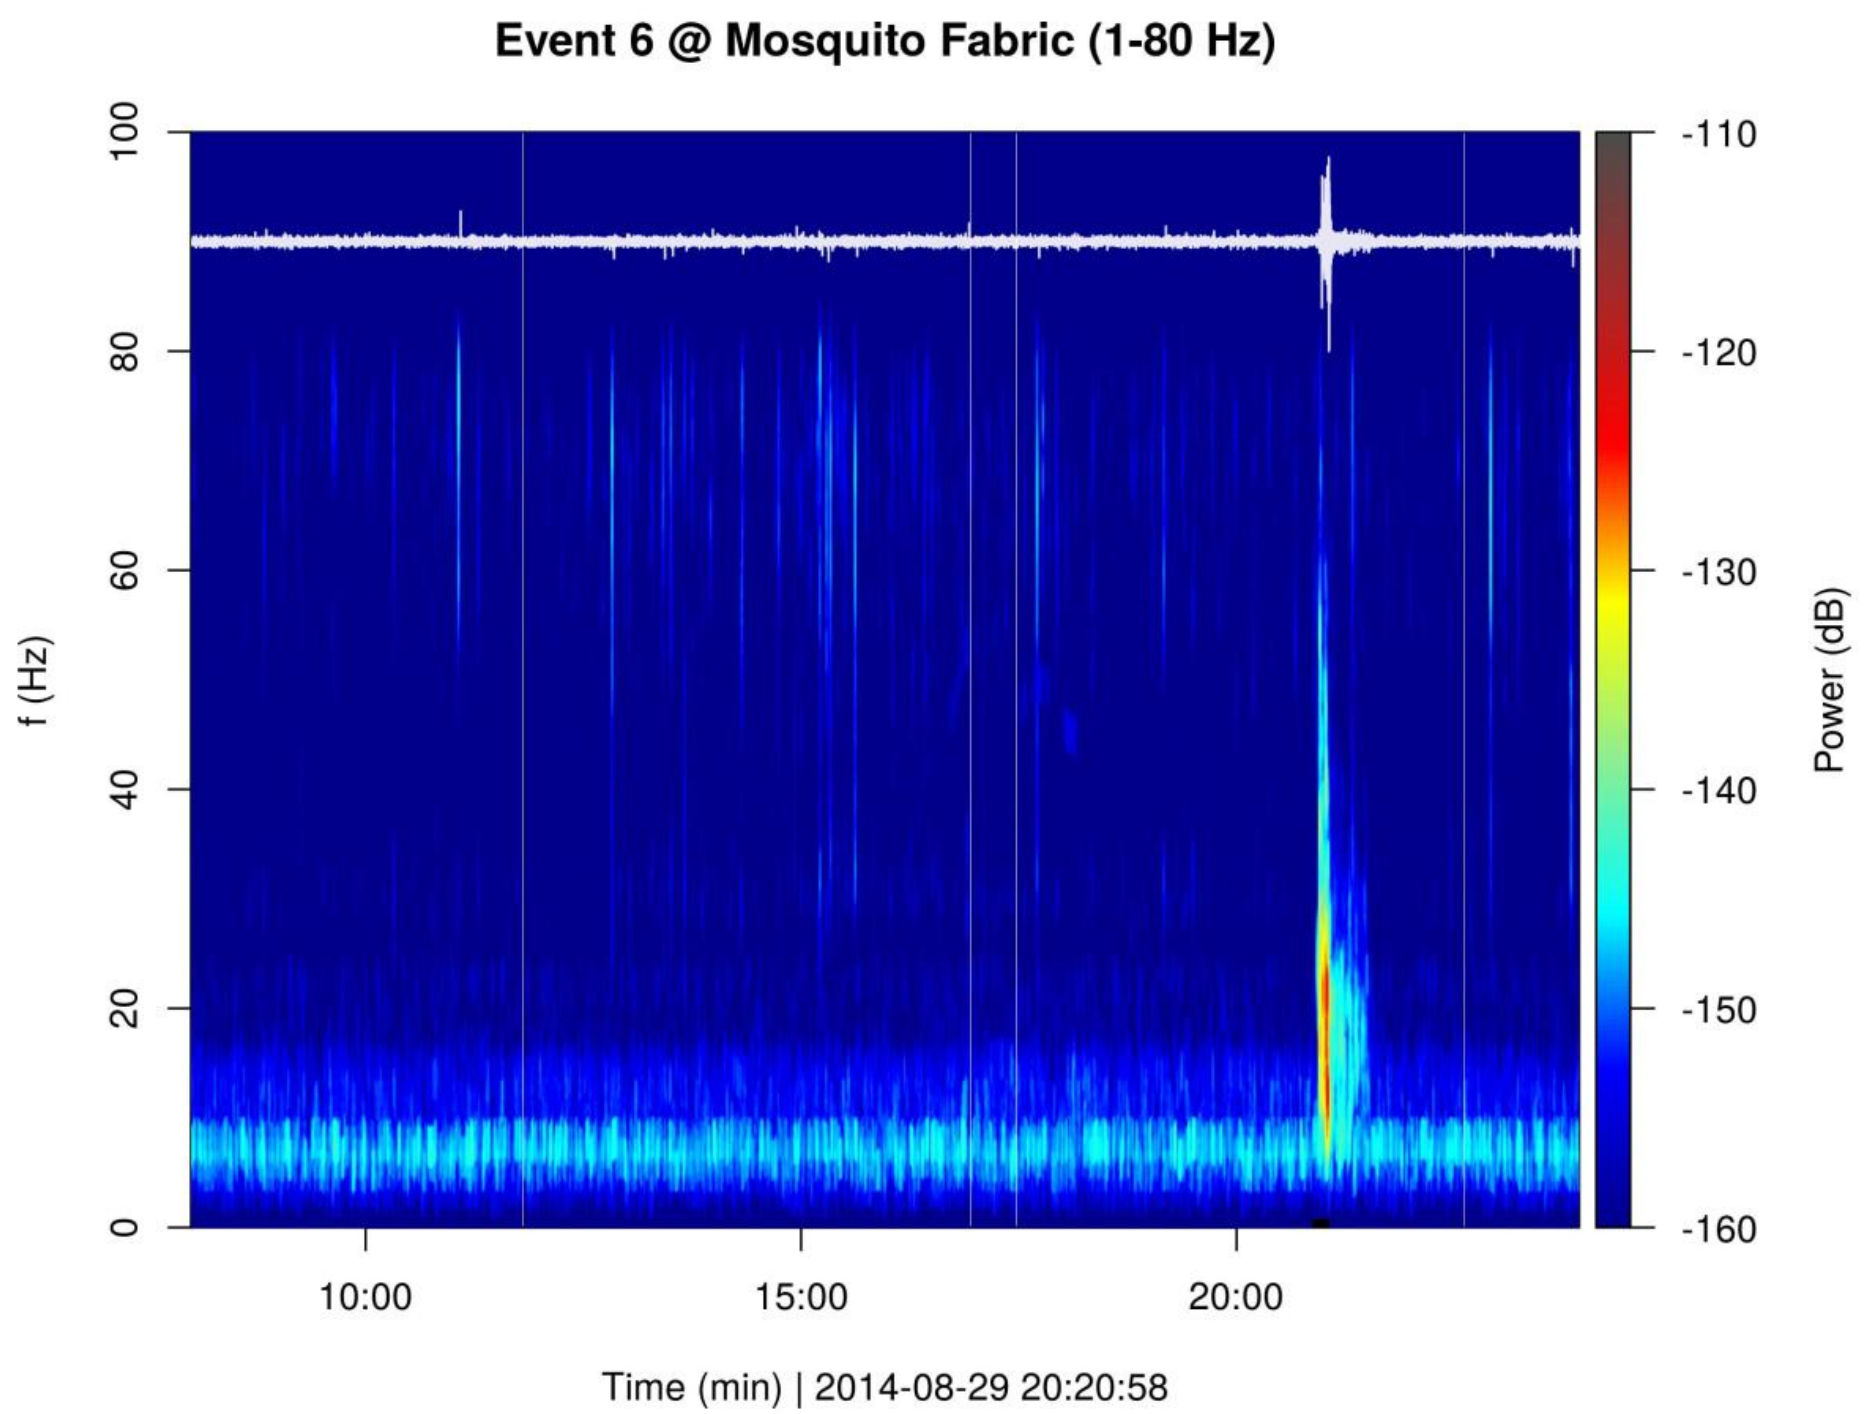

Figure 7:



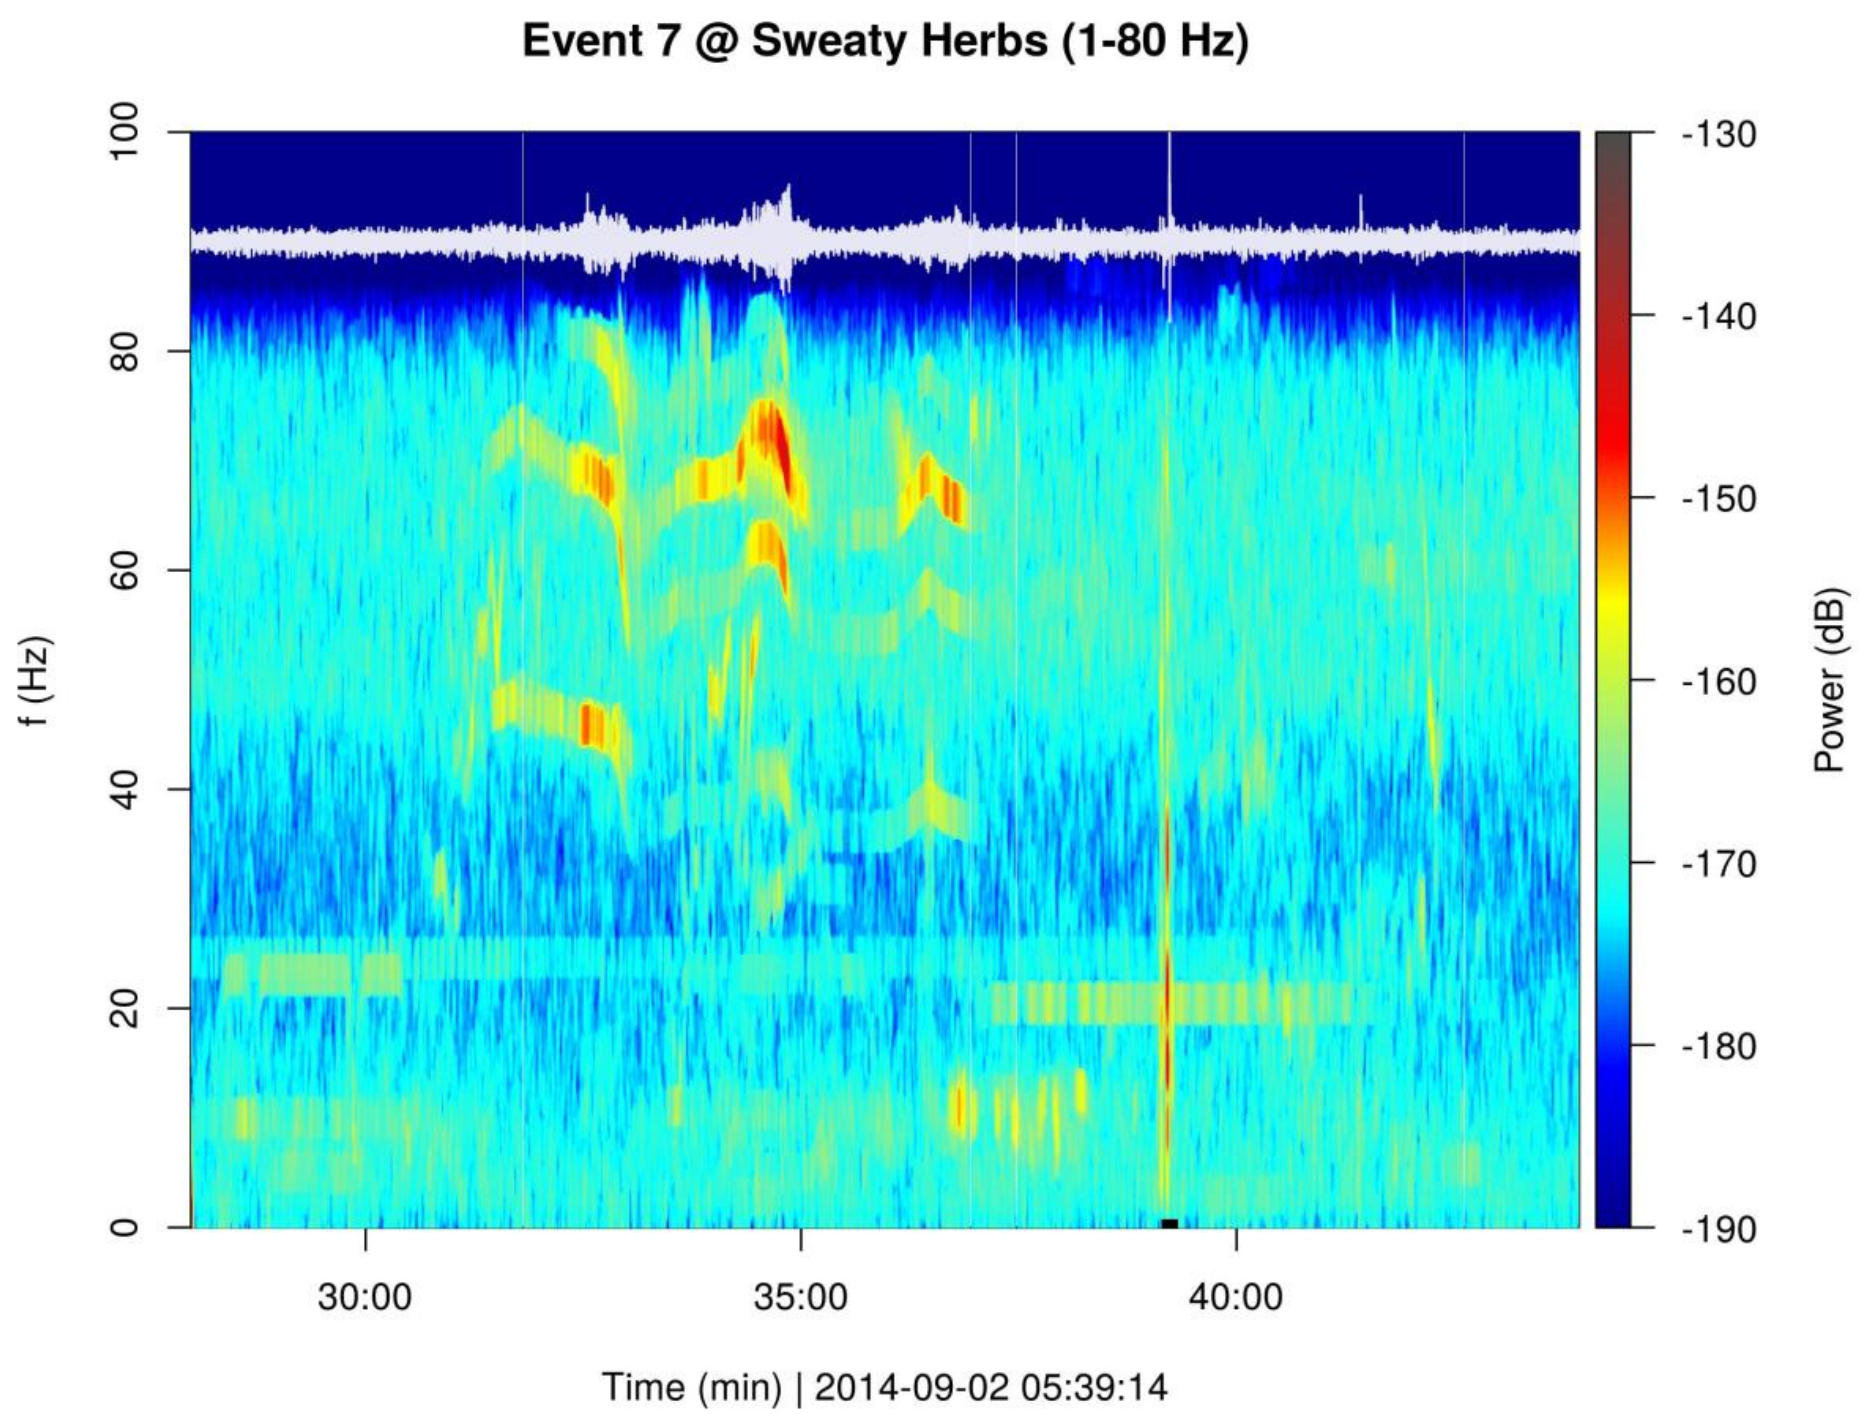

Figure 8:

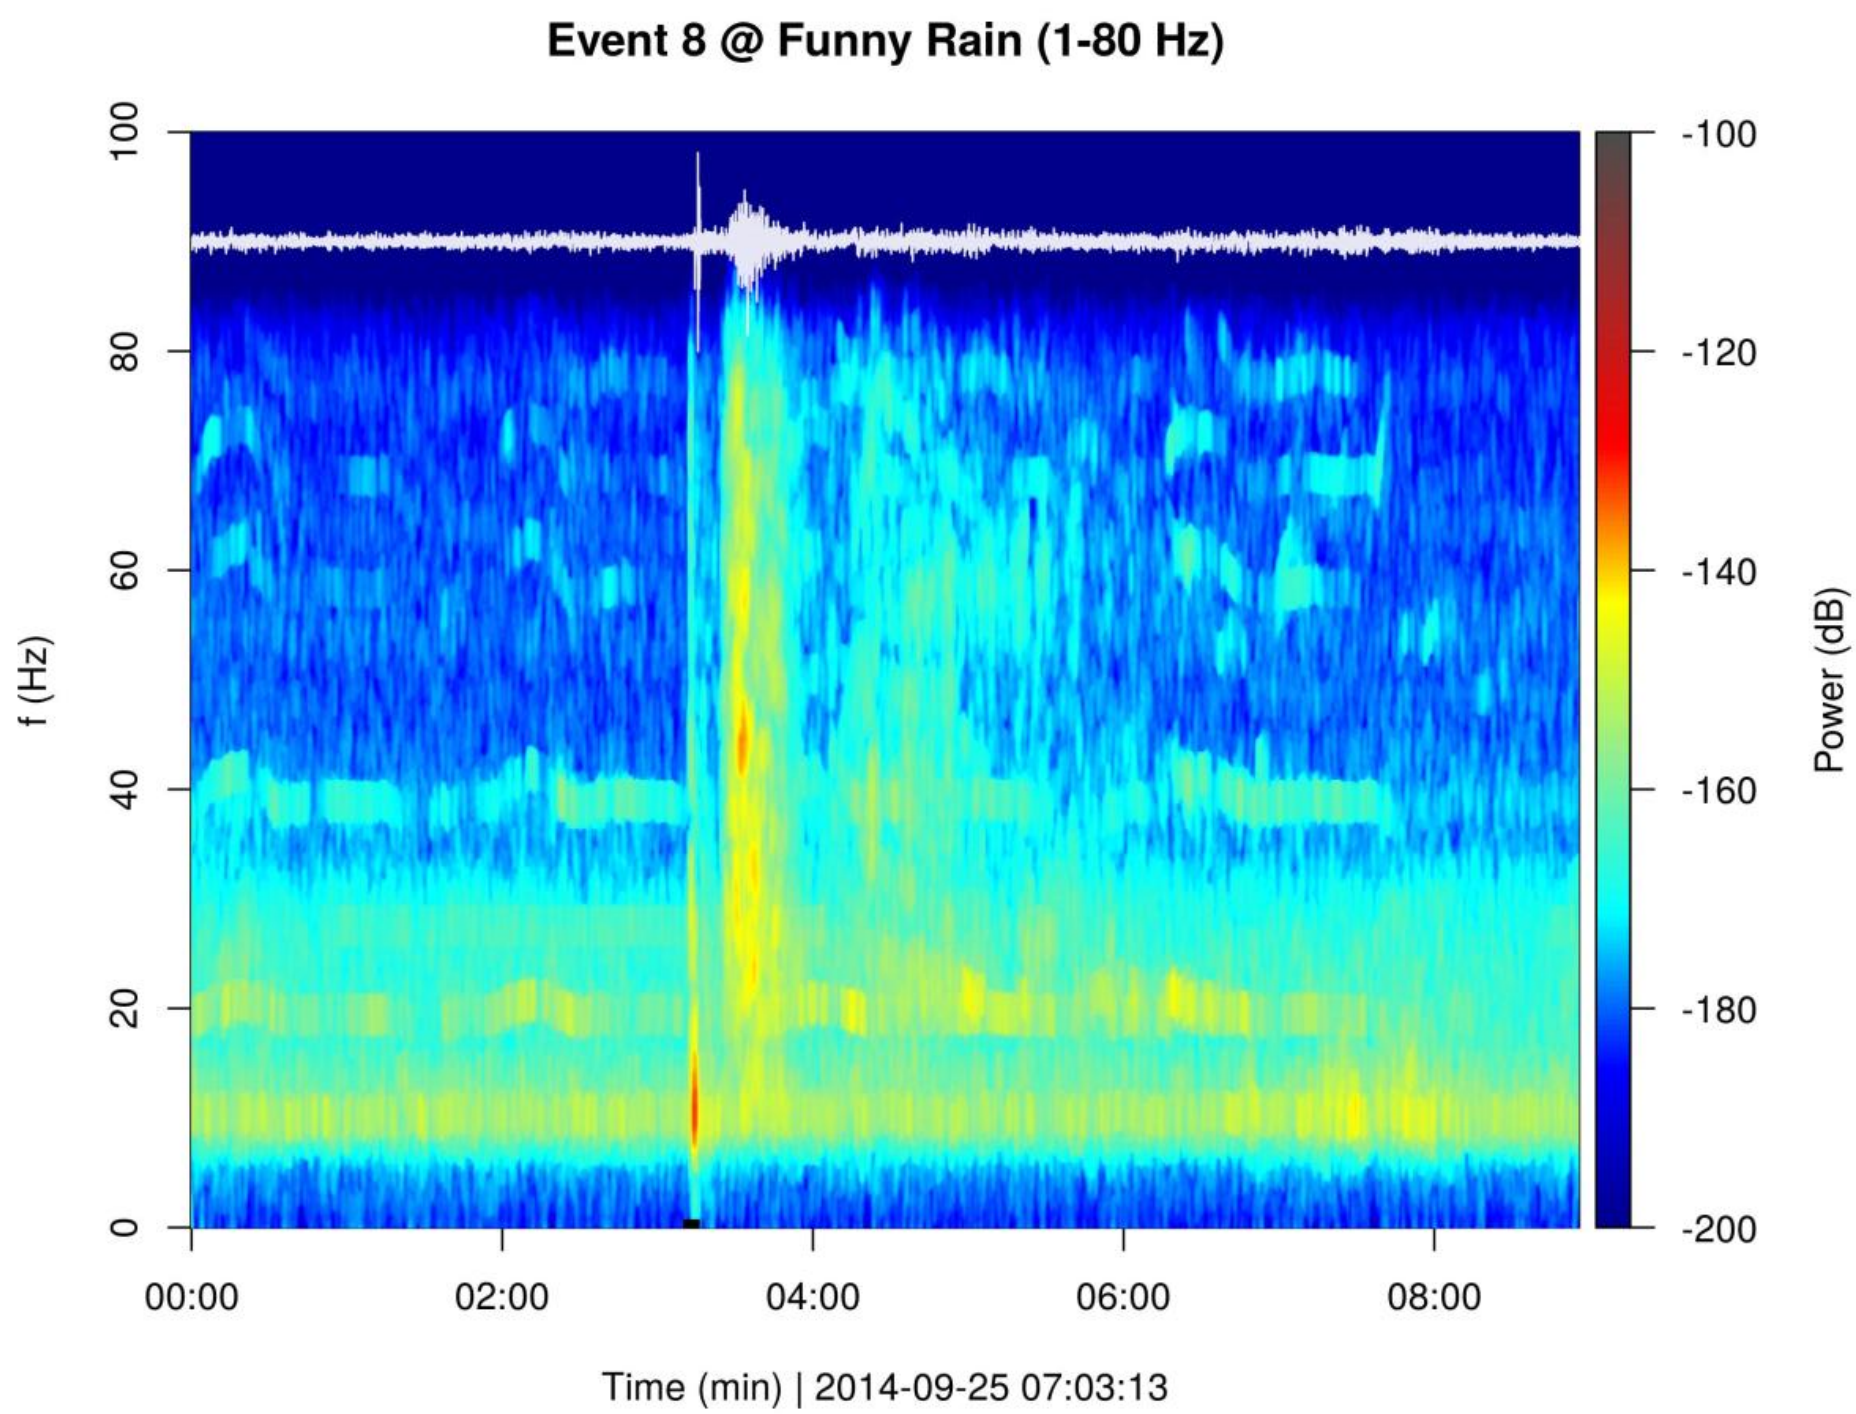

Figure 9:



### Event 9 @ Mosque Fabric (1-80 Hz)

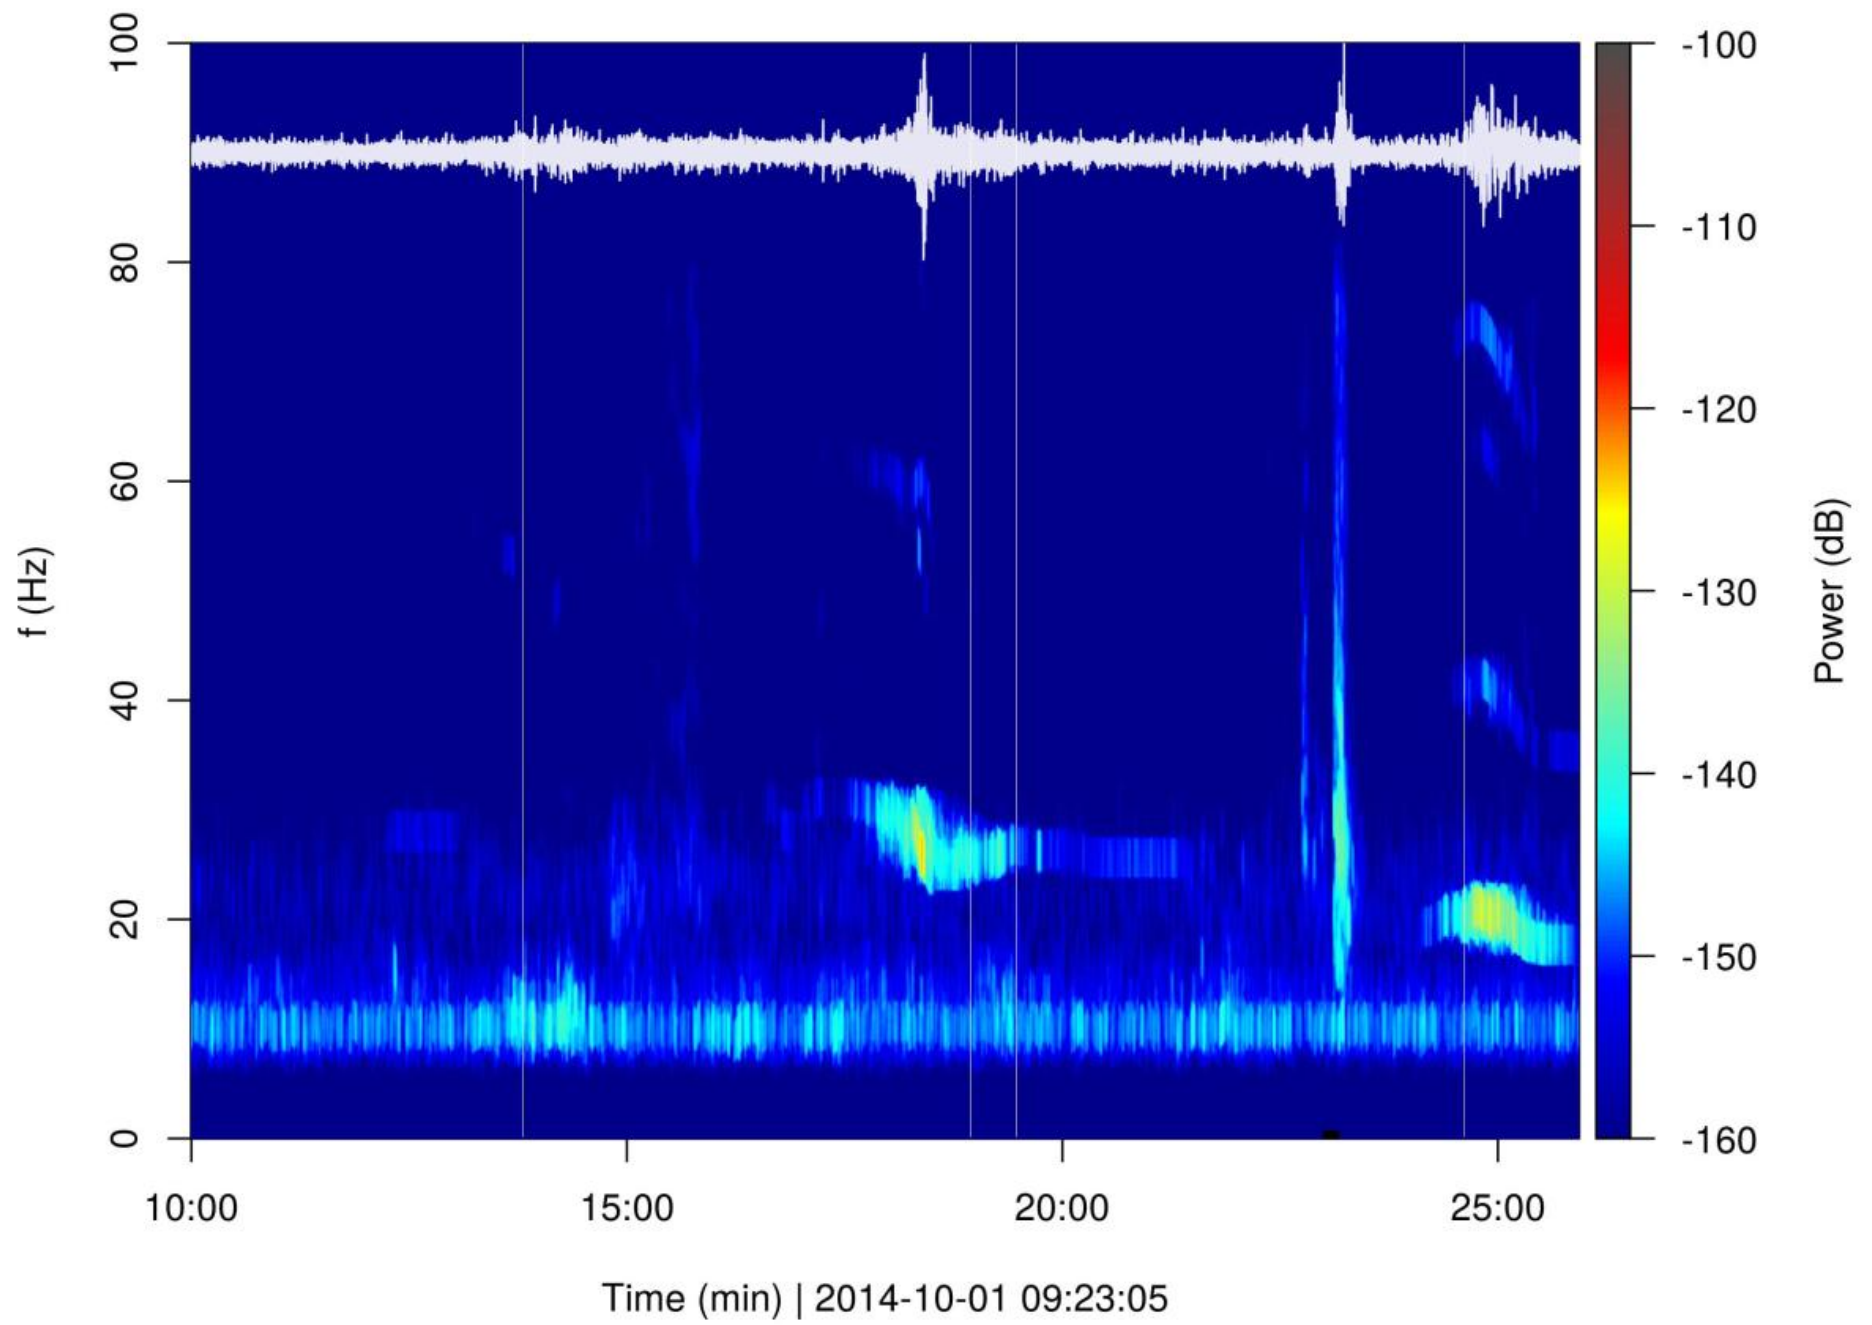

Figure 10:

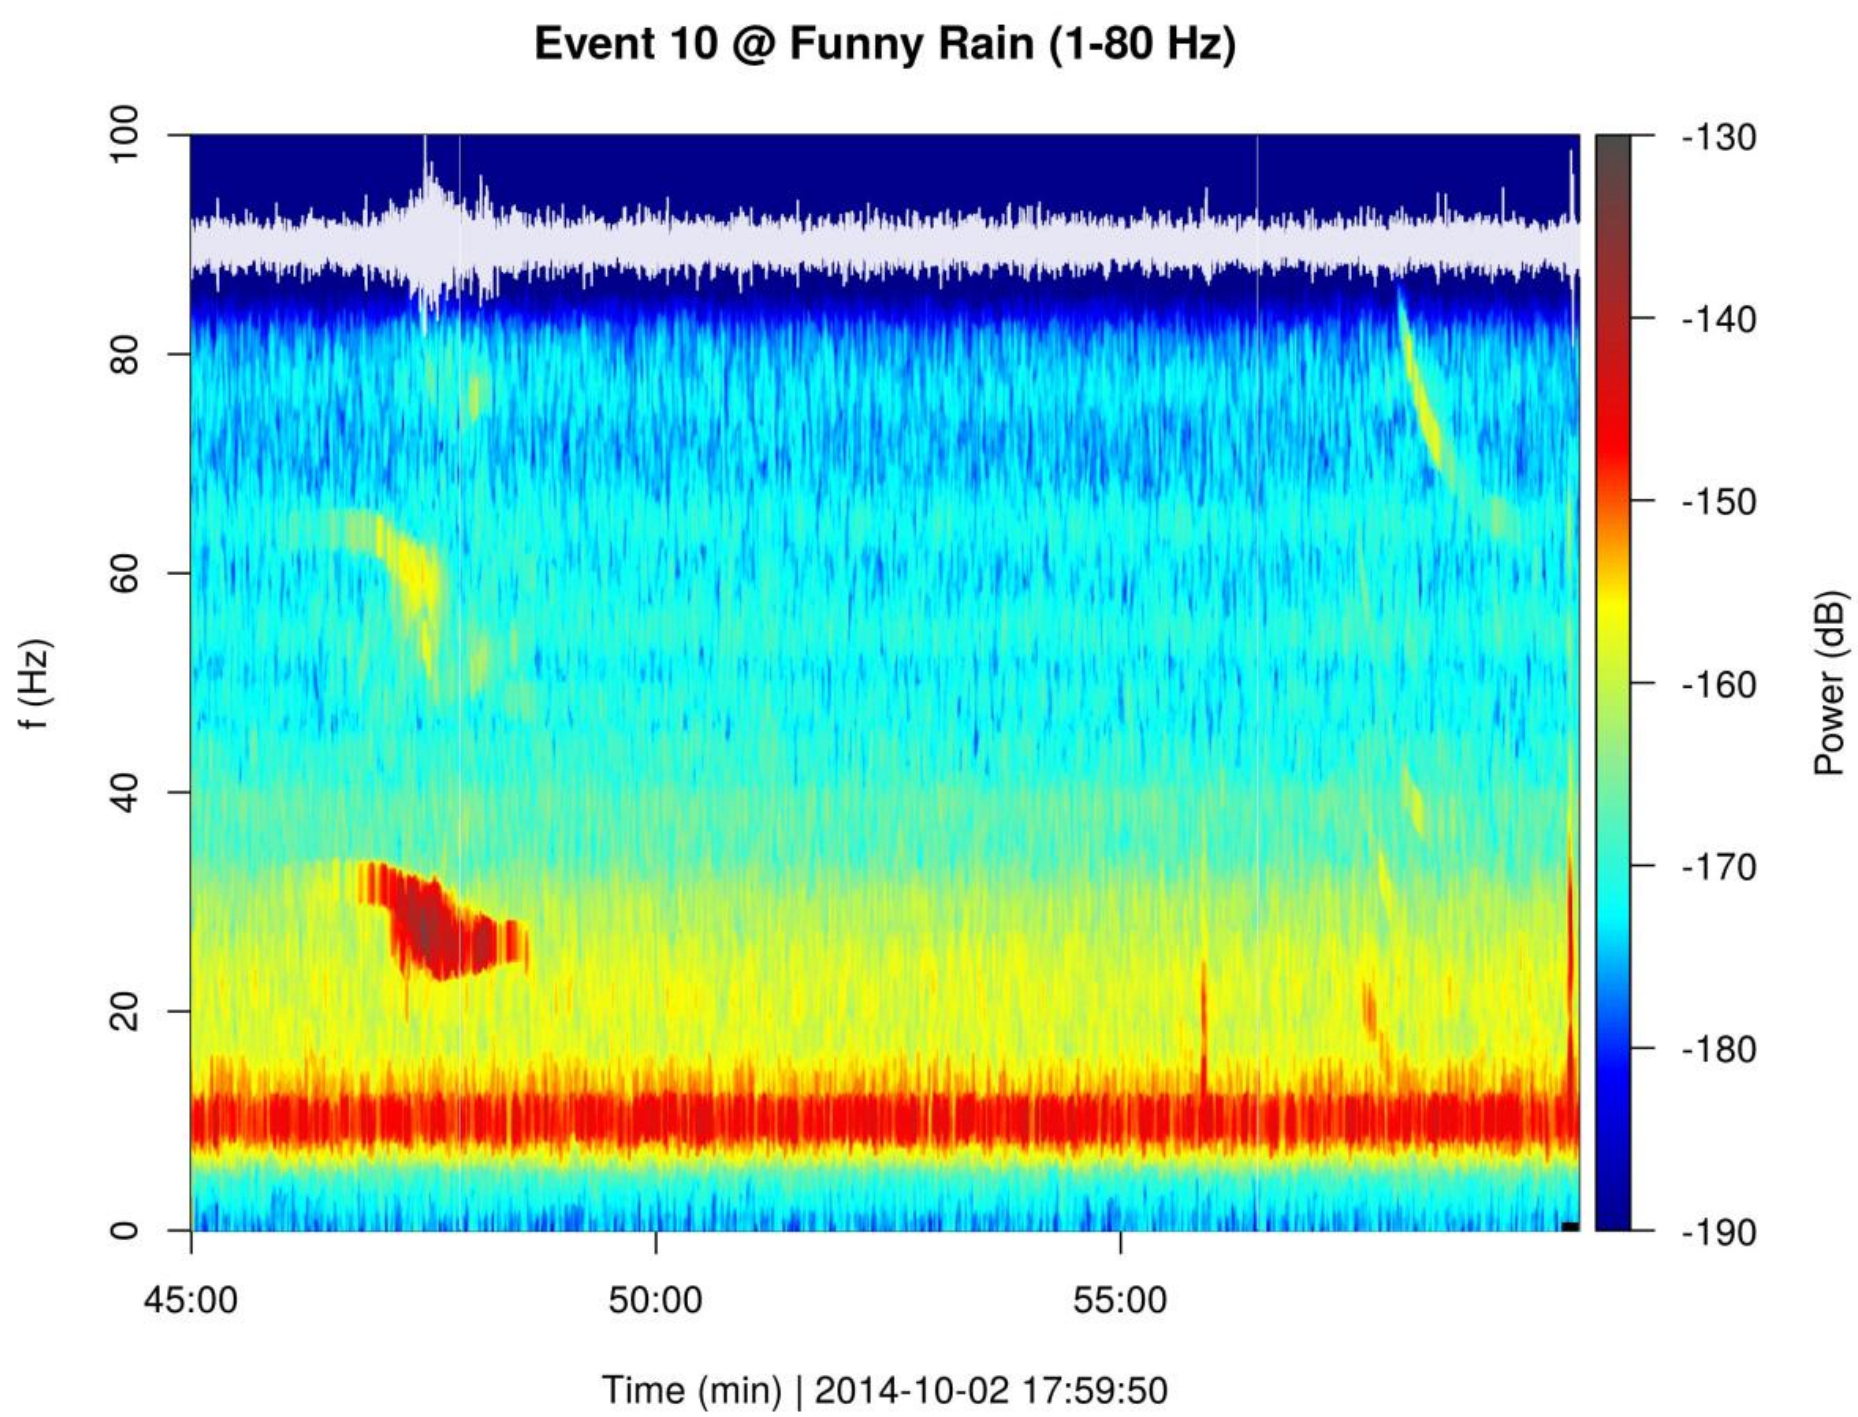

Figure 11:



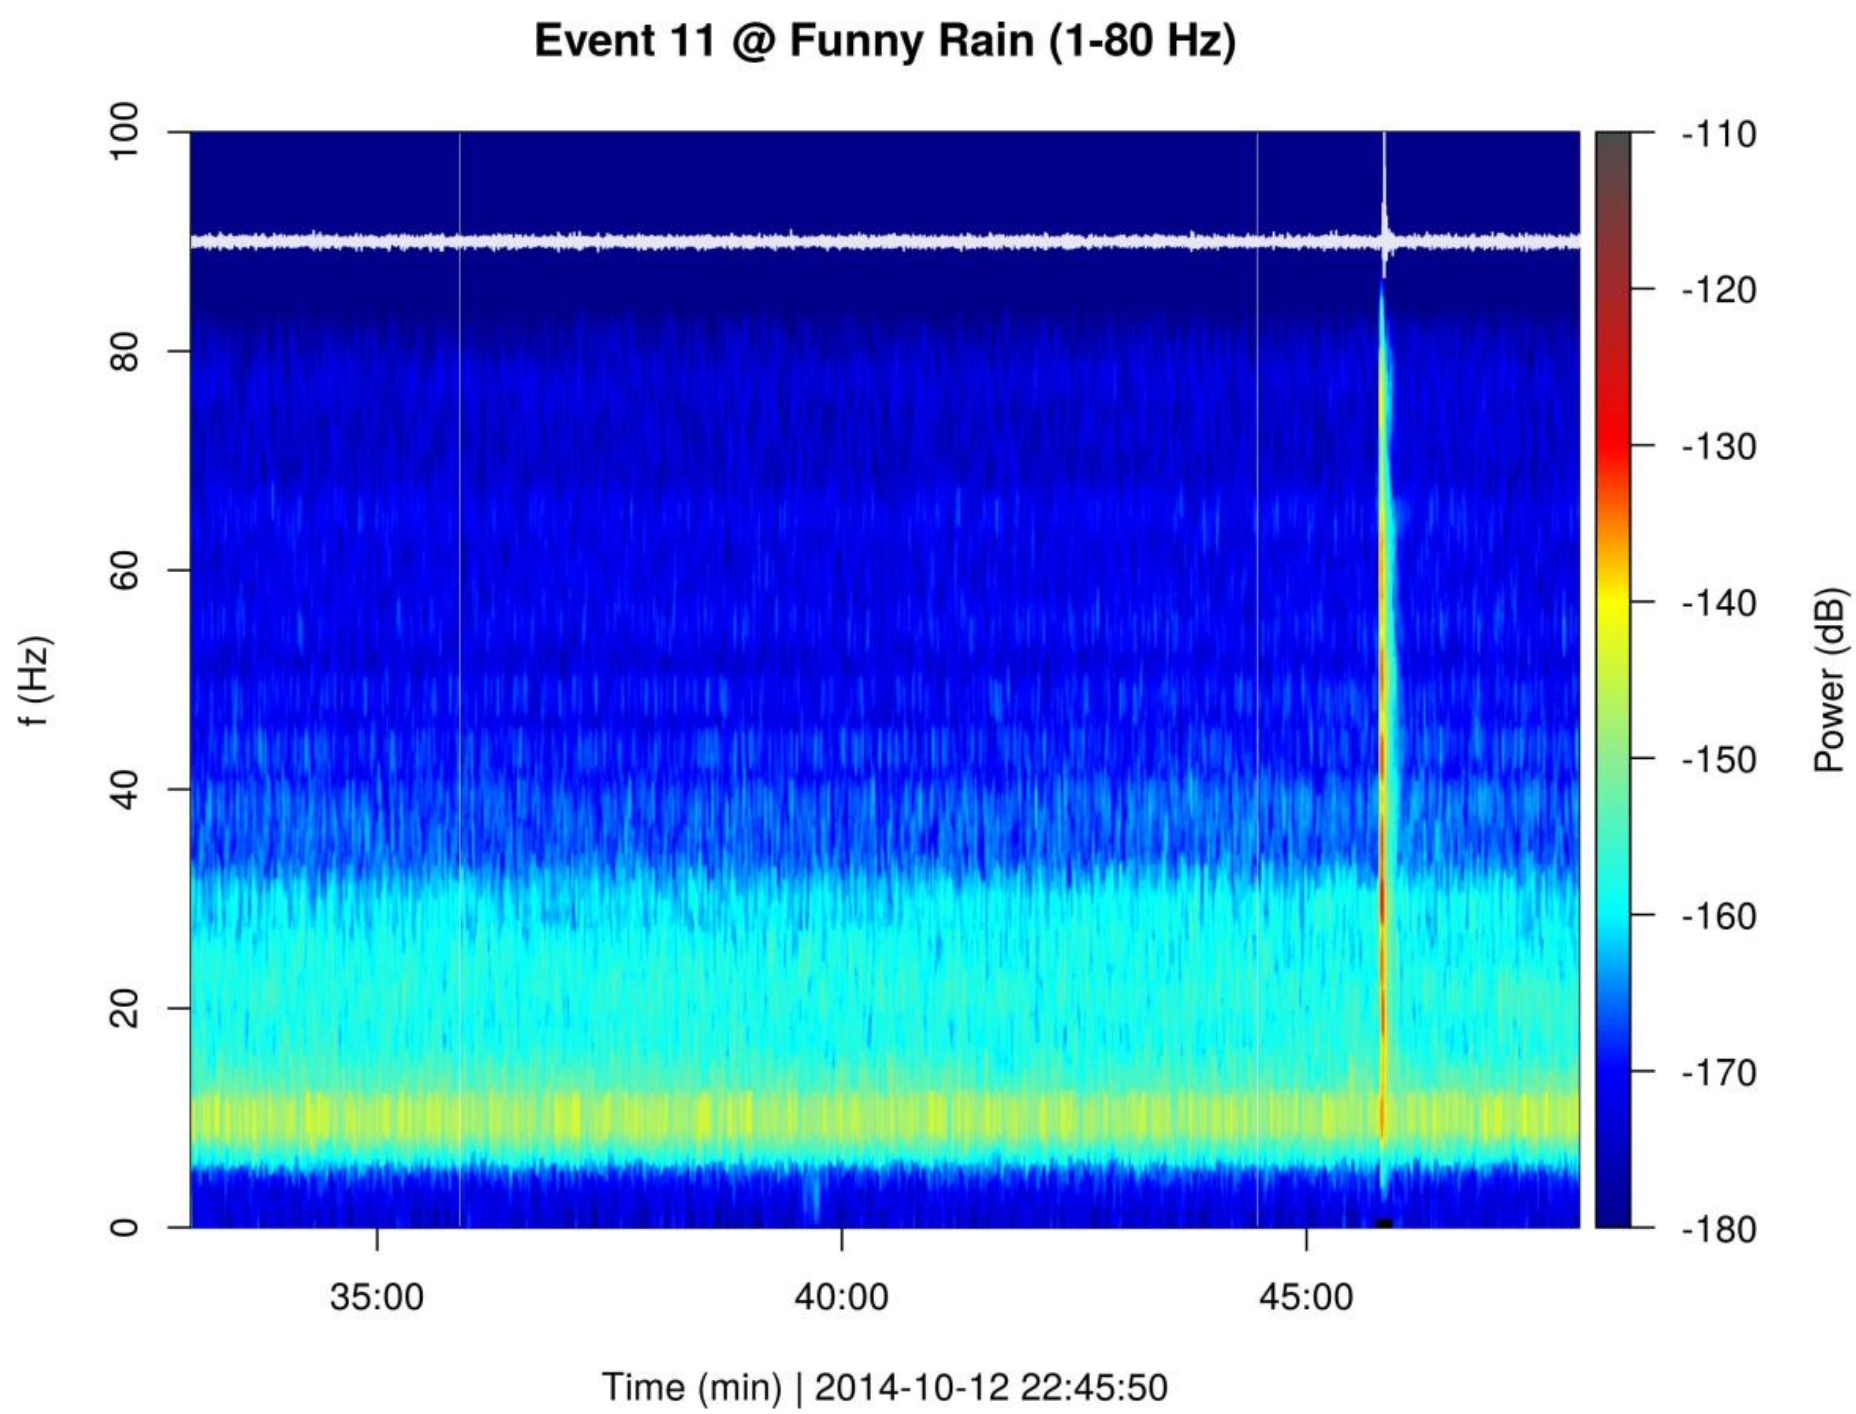

Figure 12:

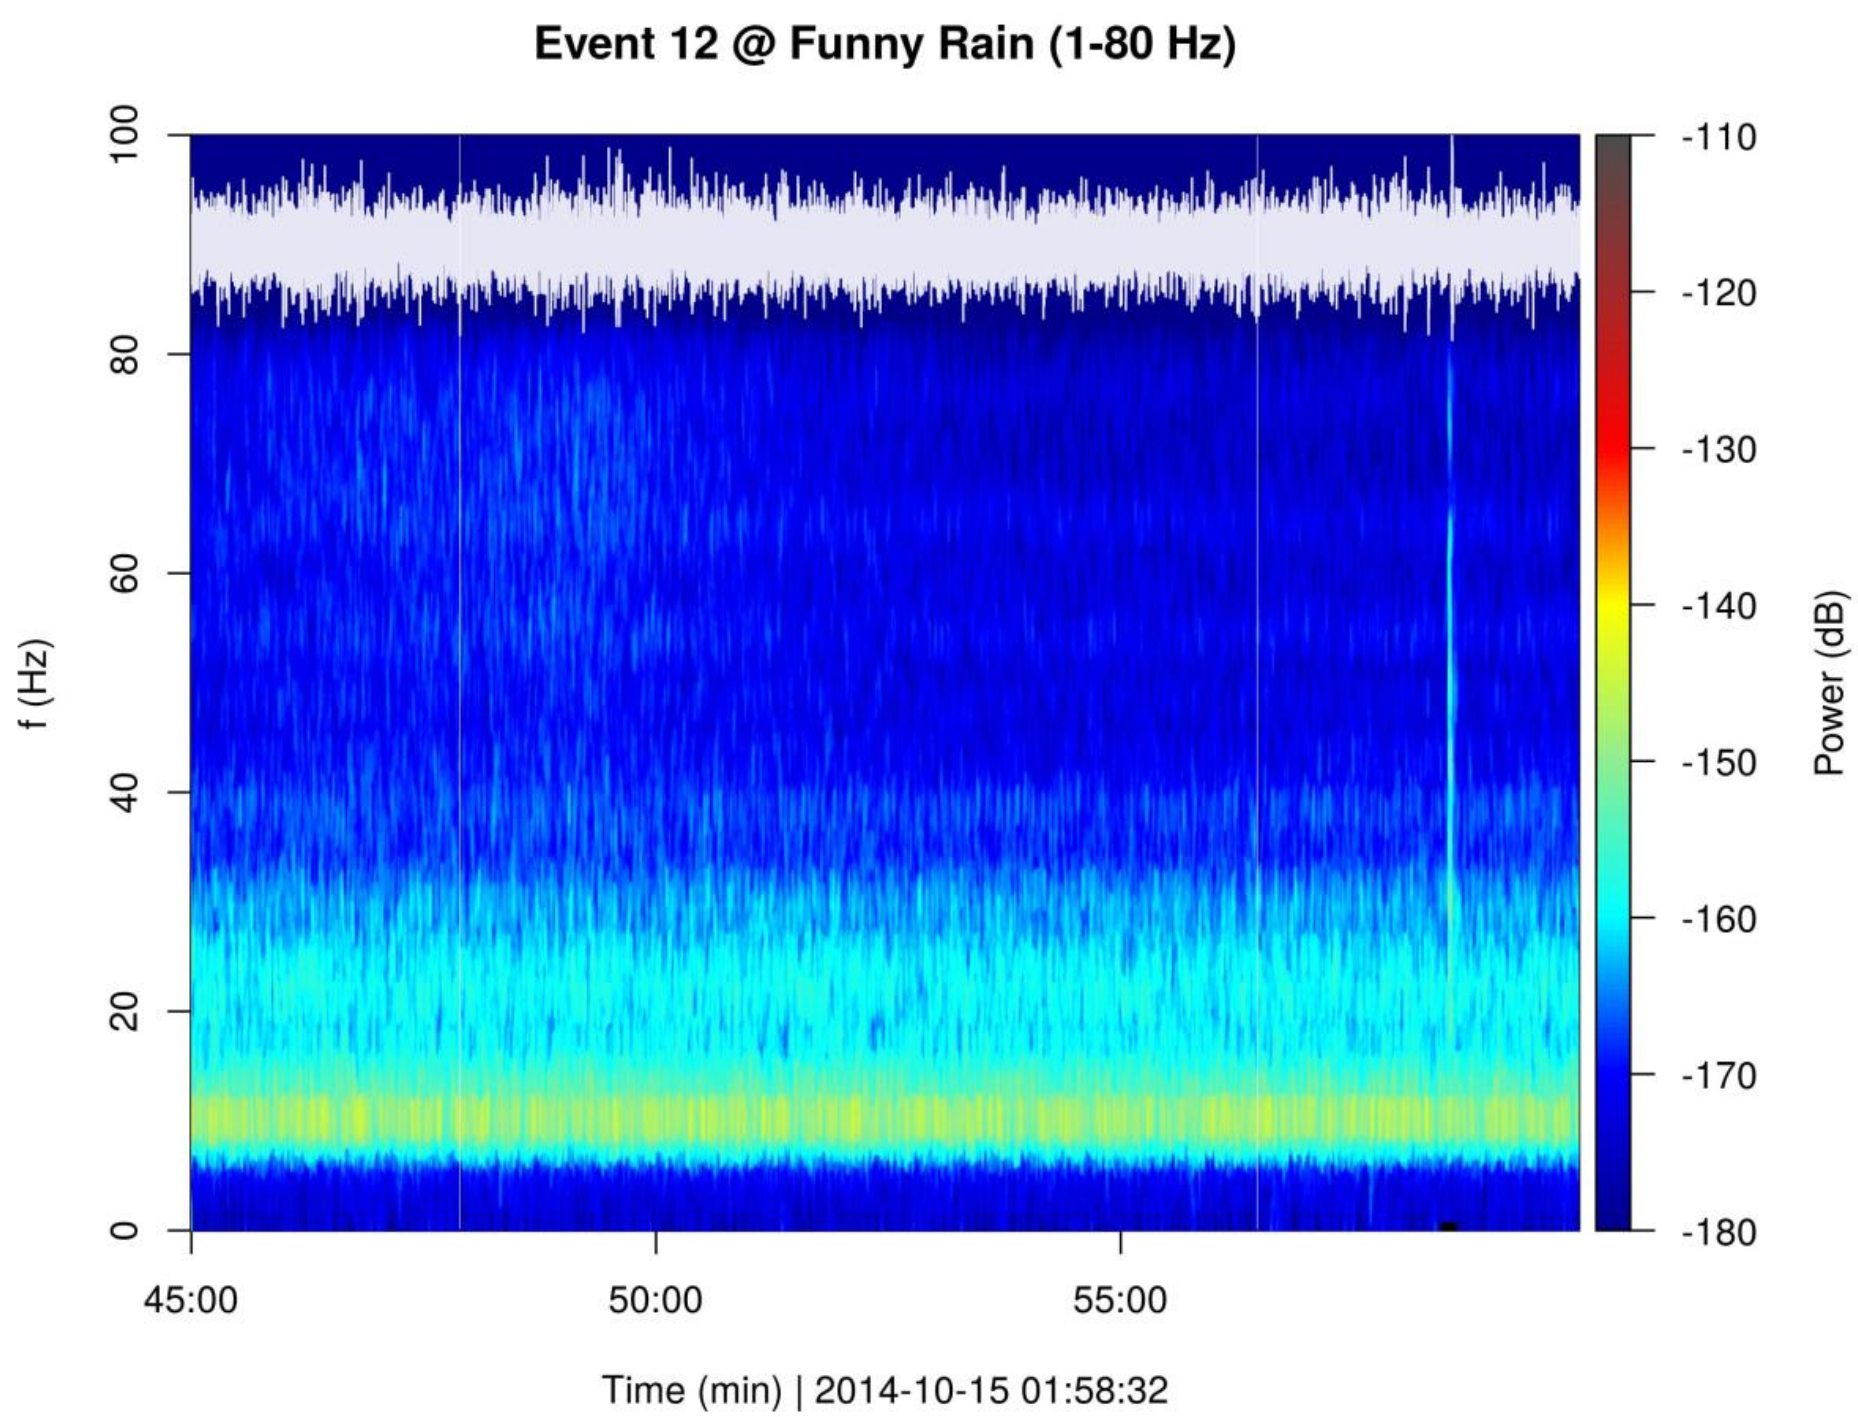

Figure 13:



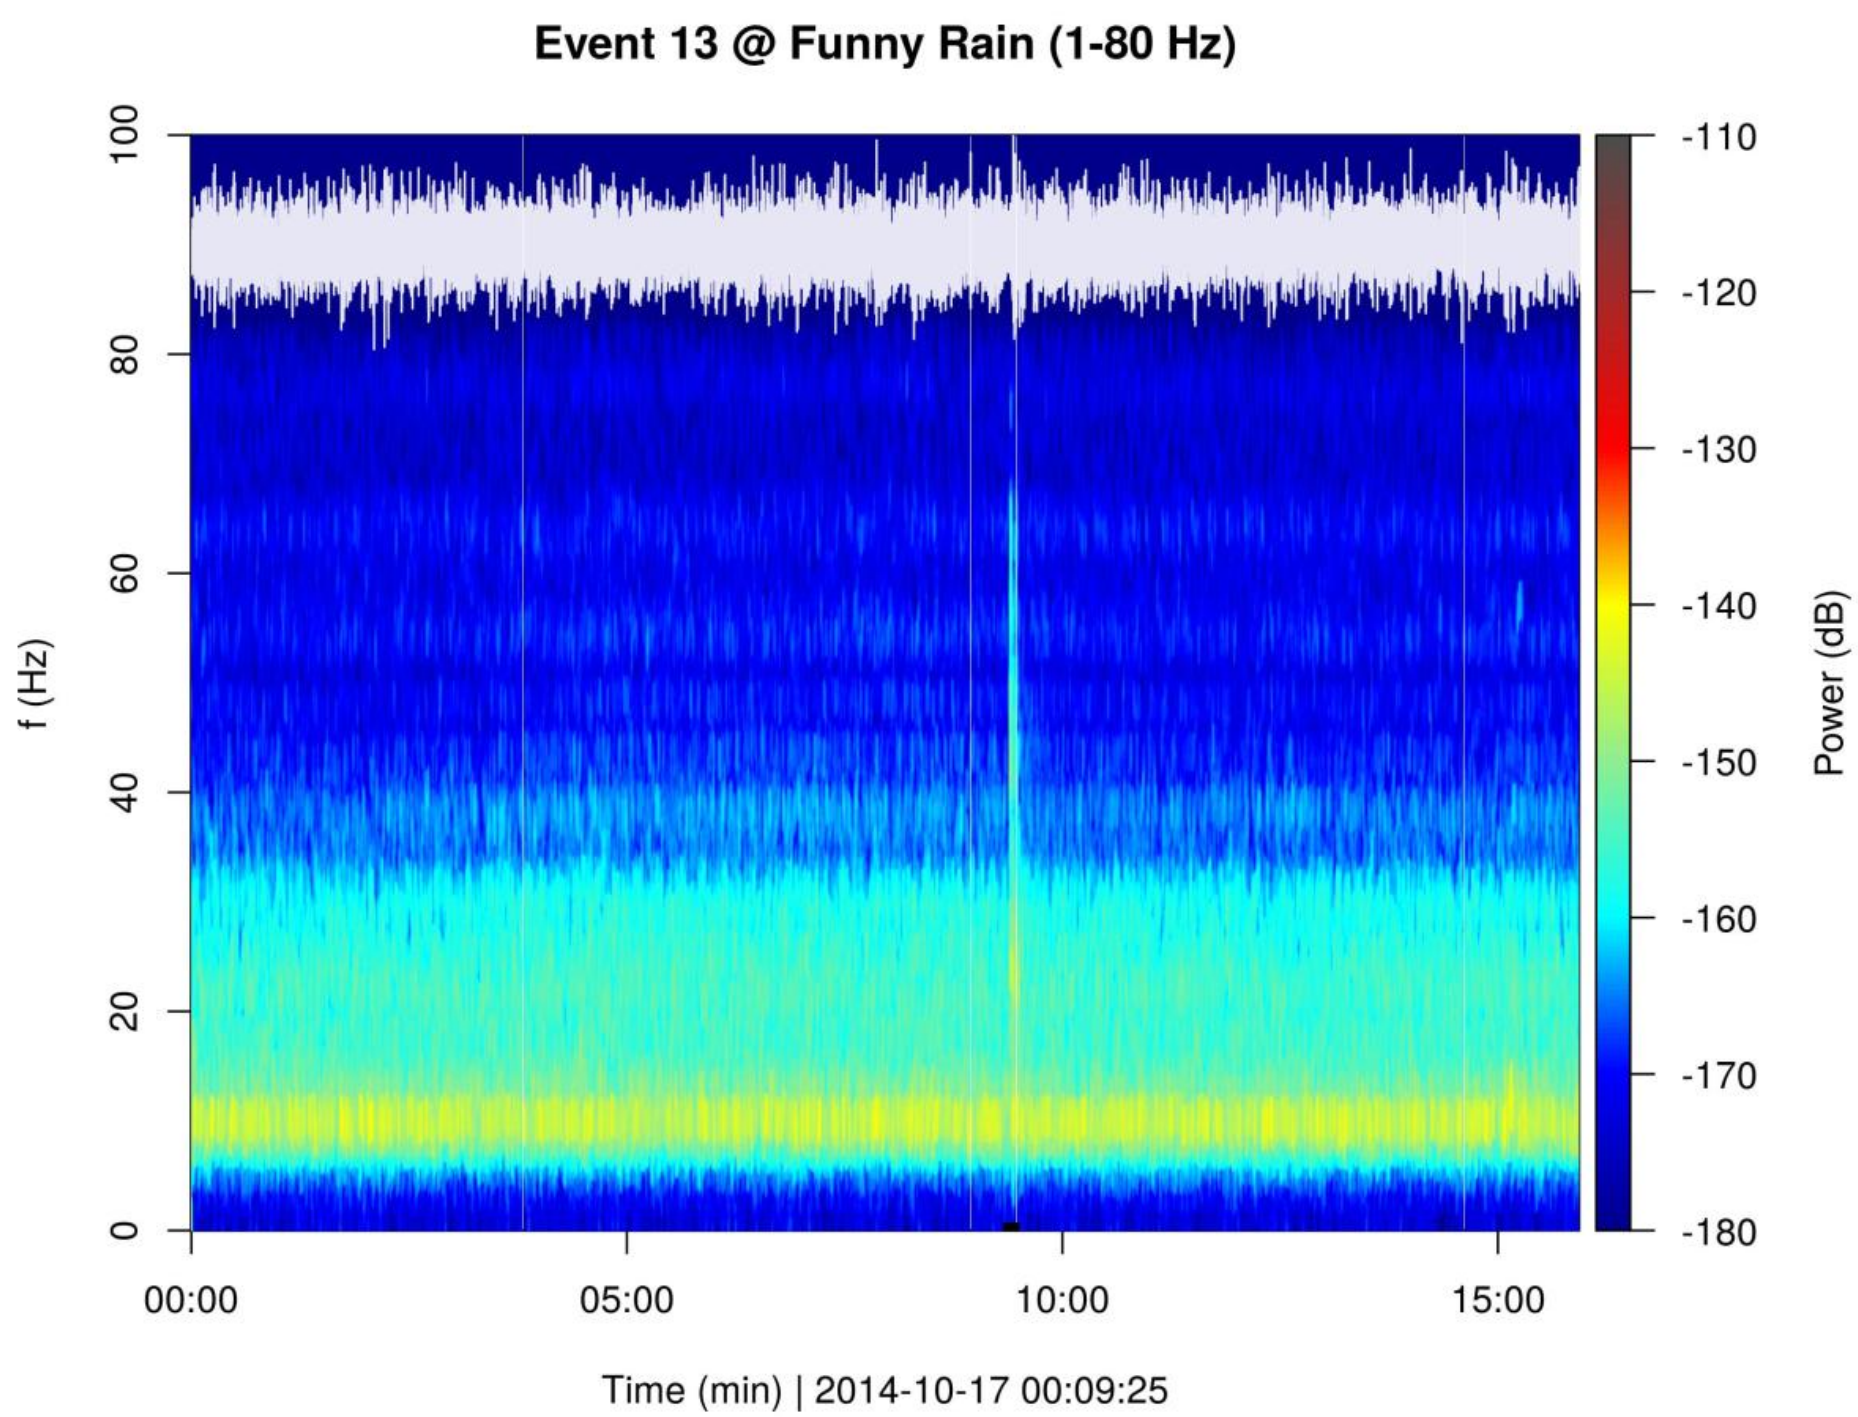

Figure 14:

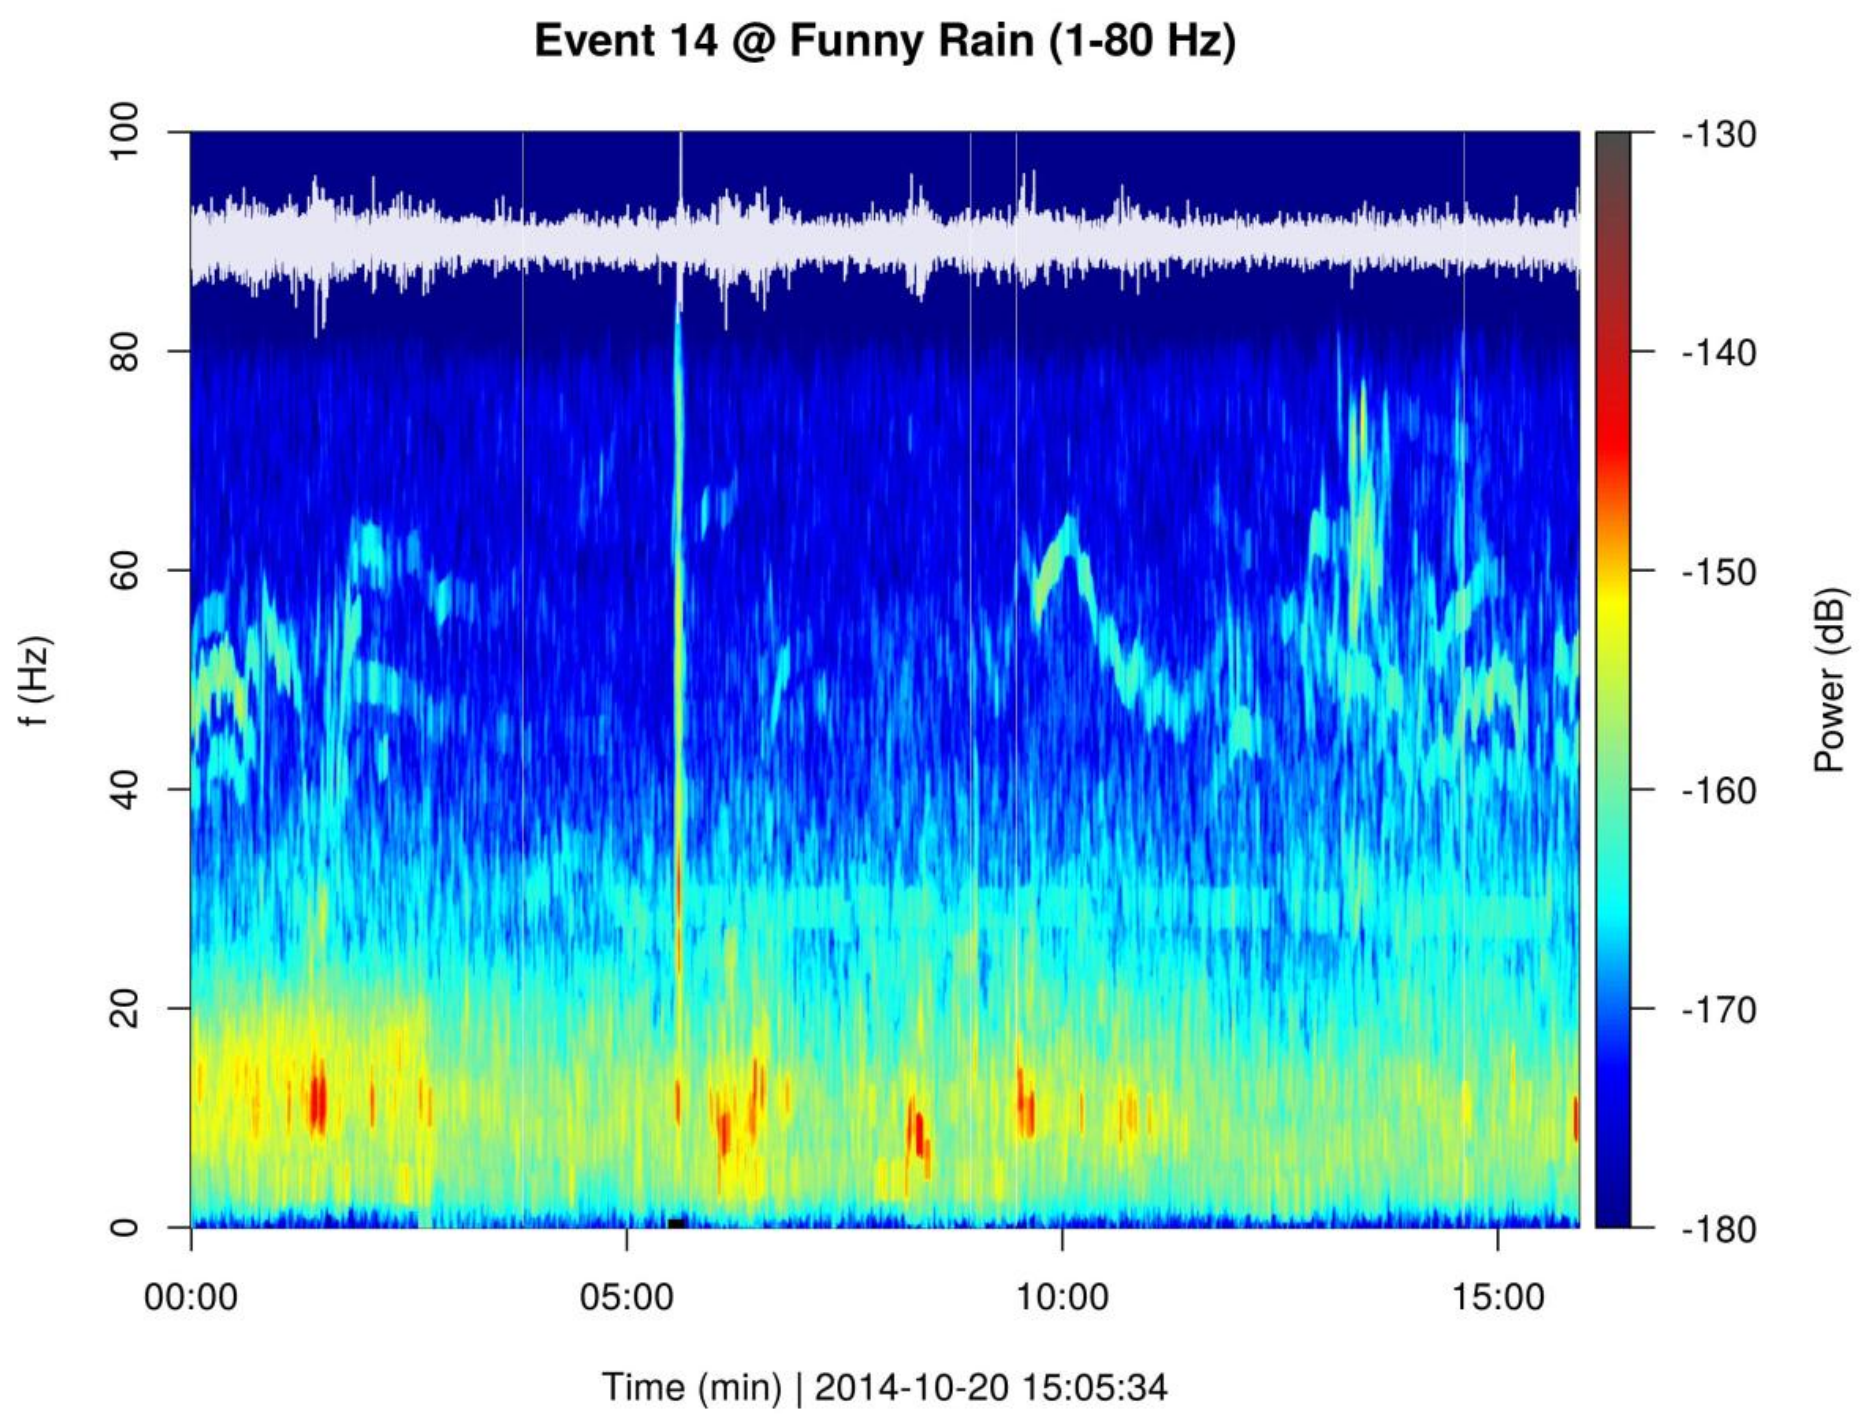

Figure 15:



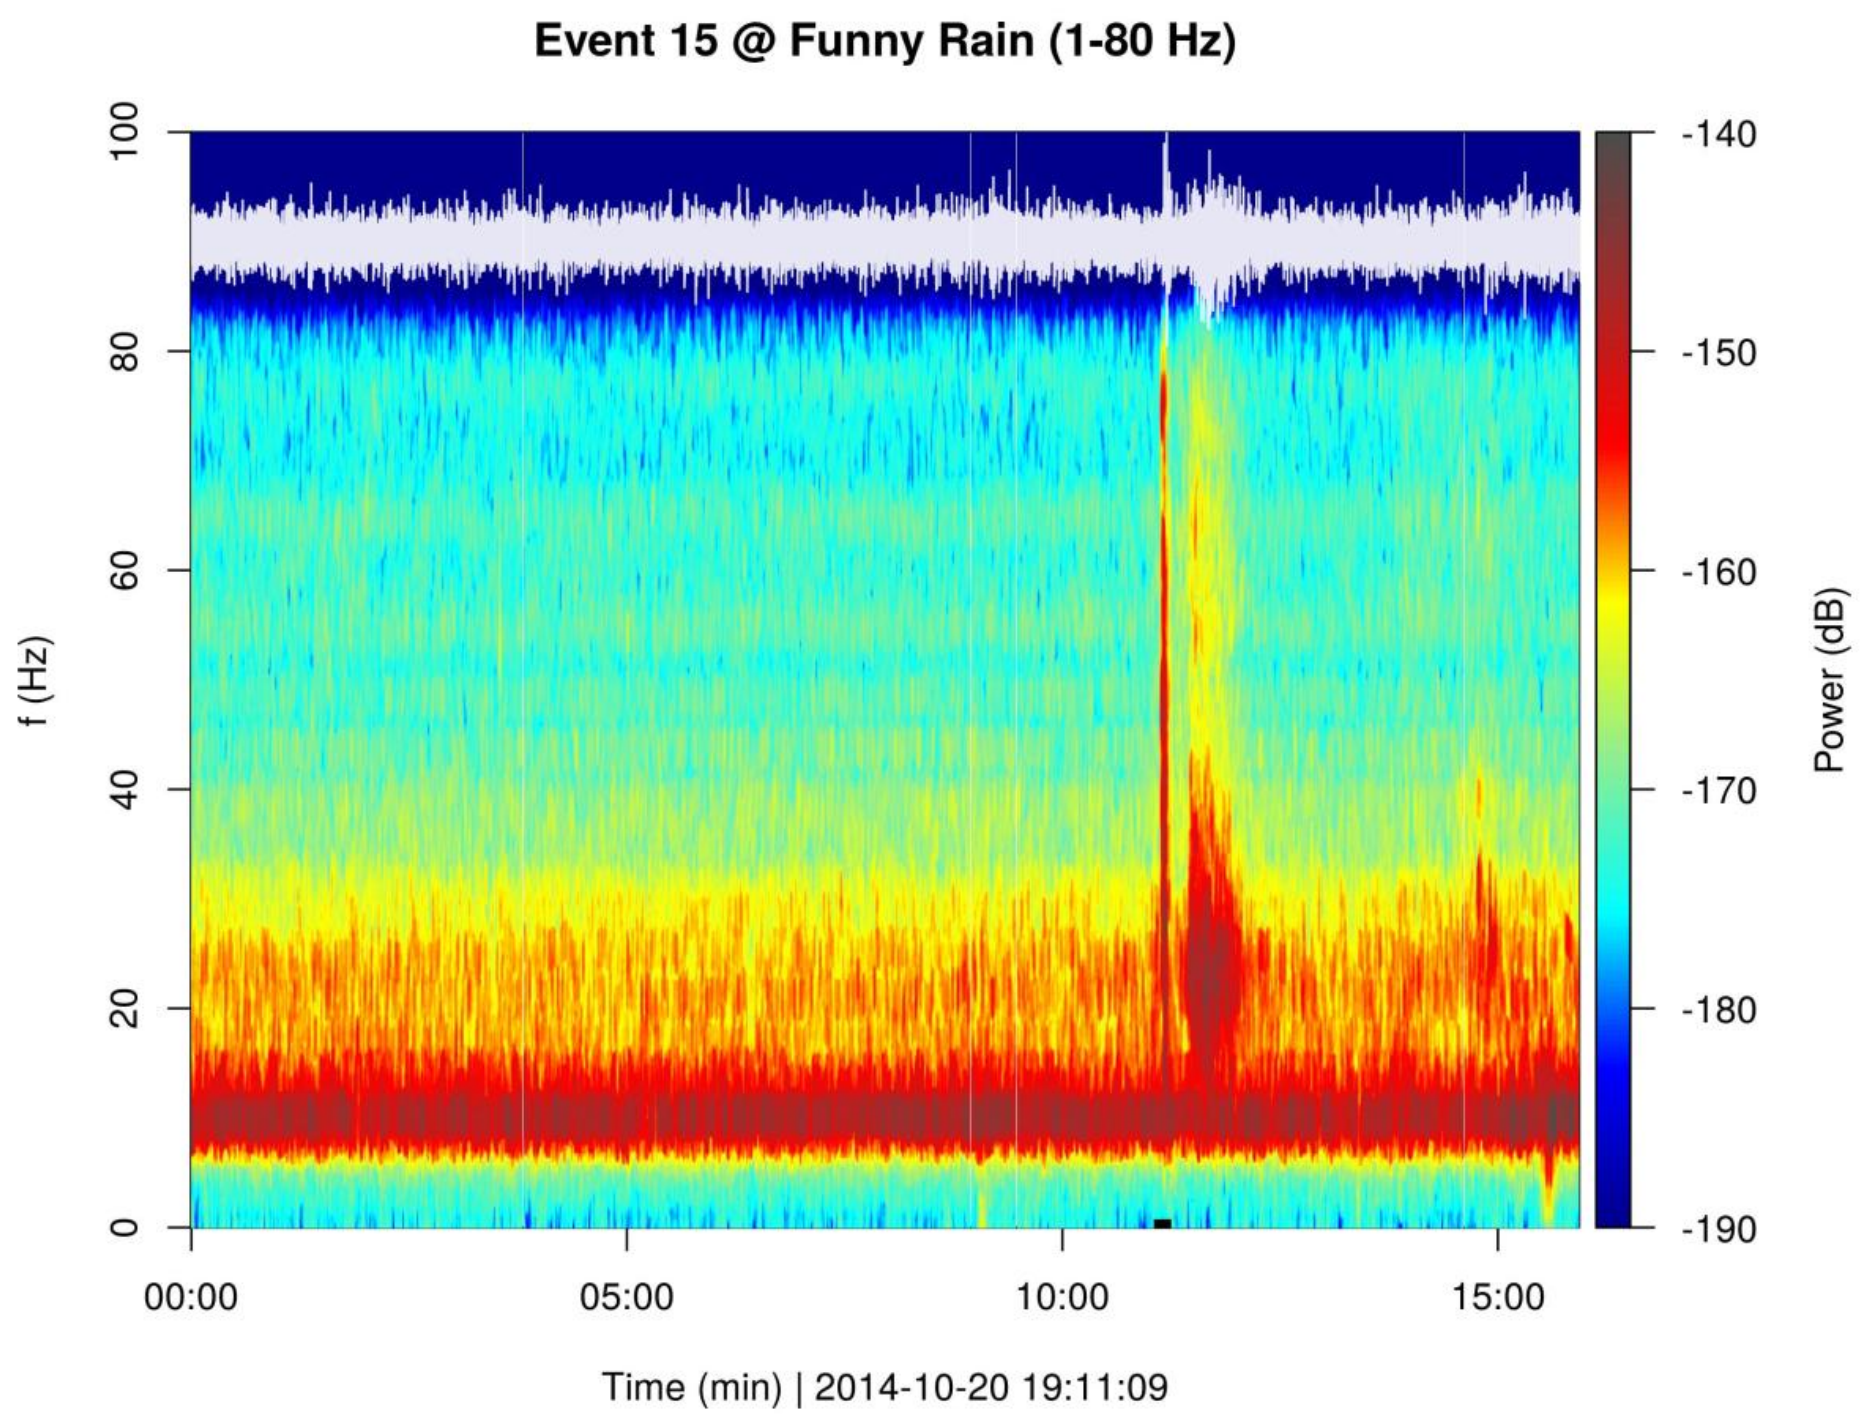

Figure 16:

Event 16 @ Funny Rain (1-80 Hz)

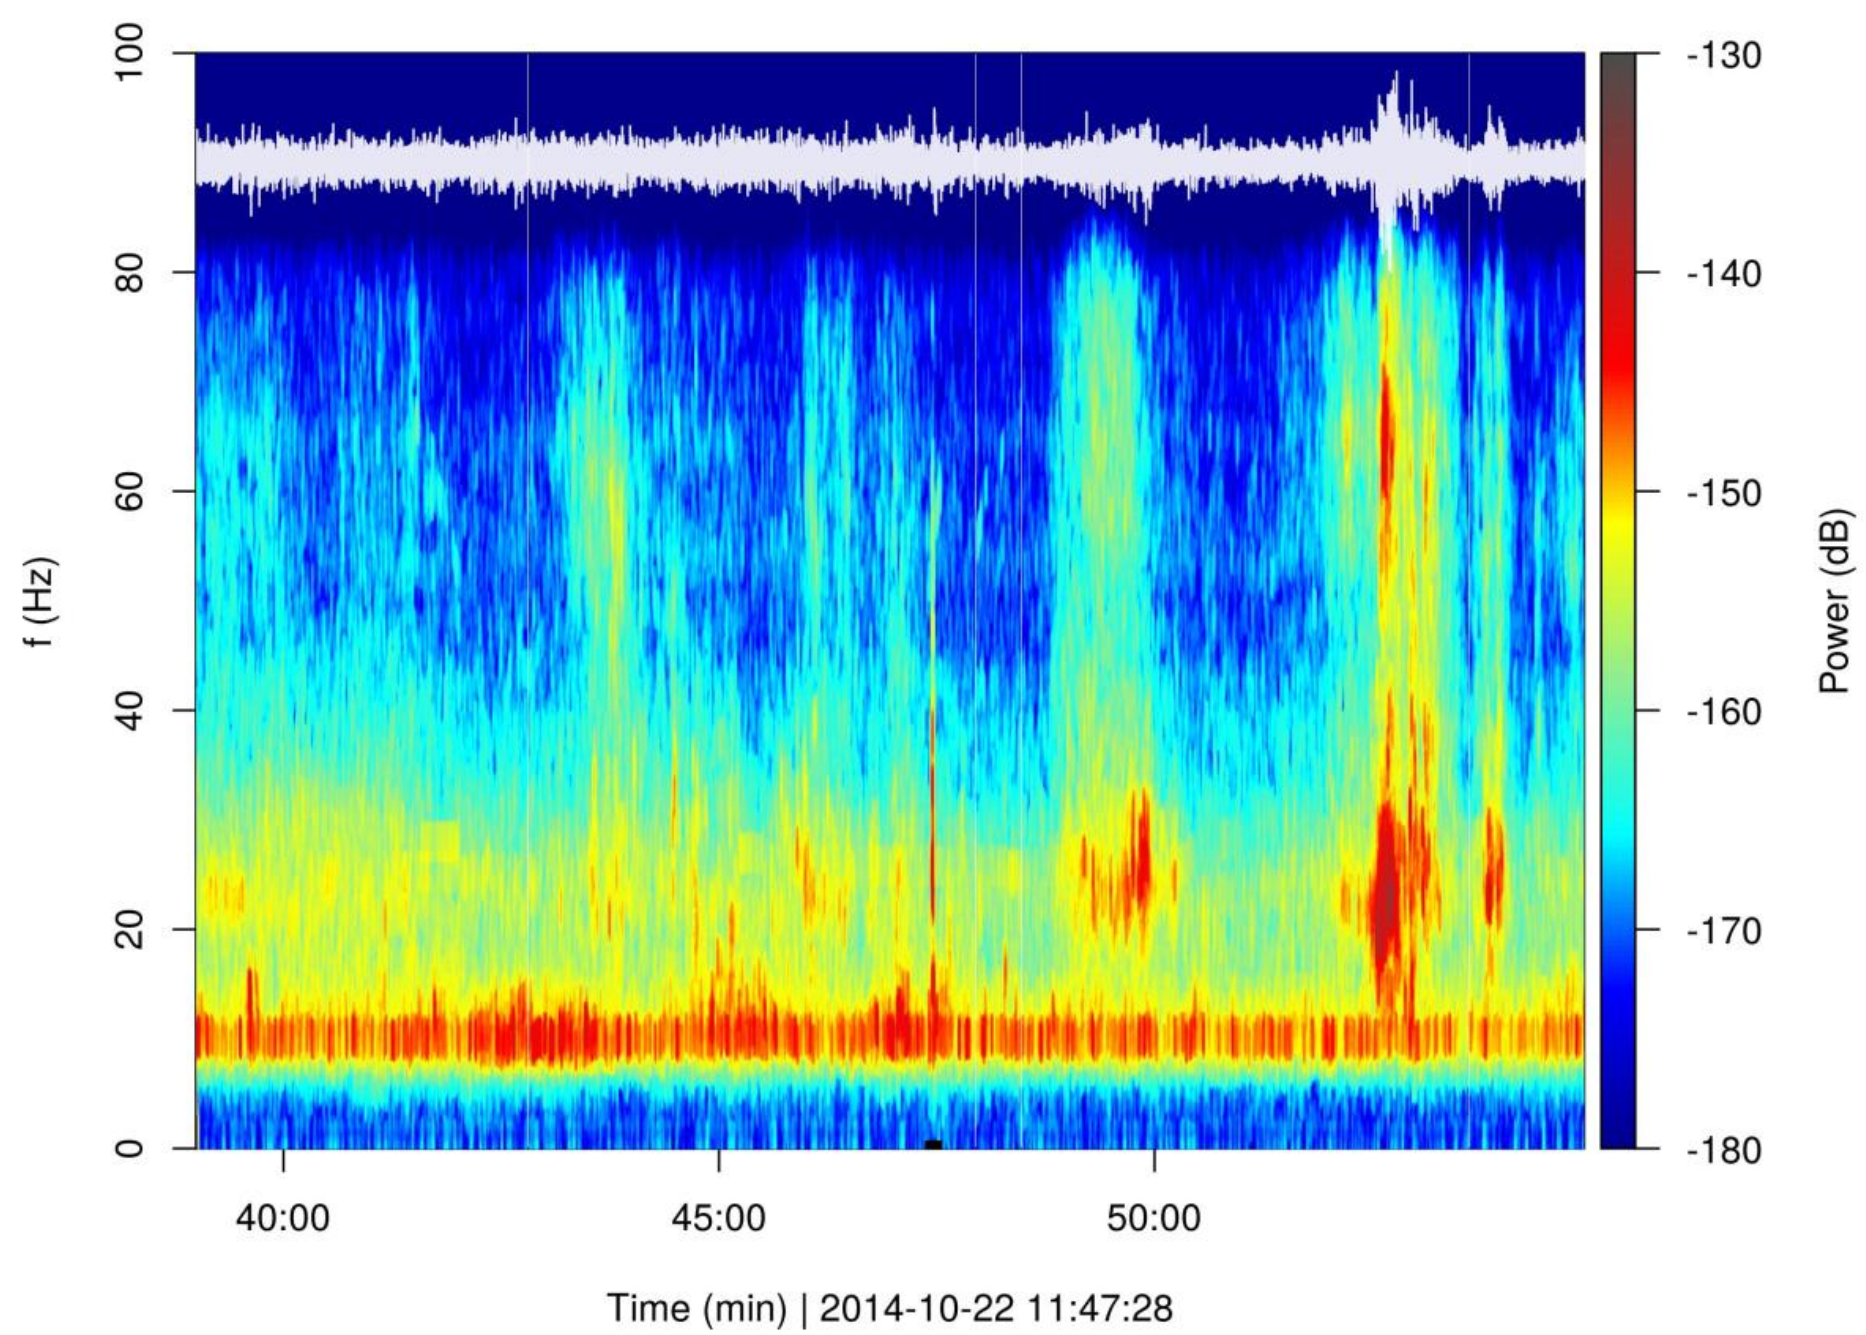

Figure 17:



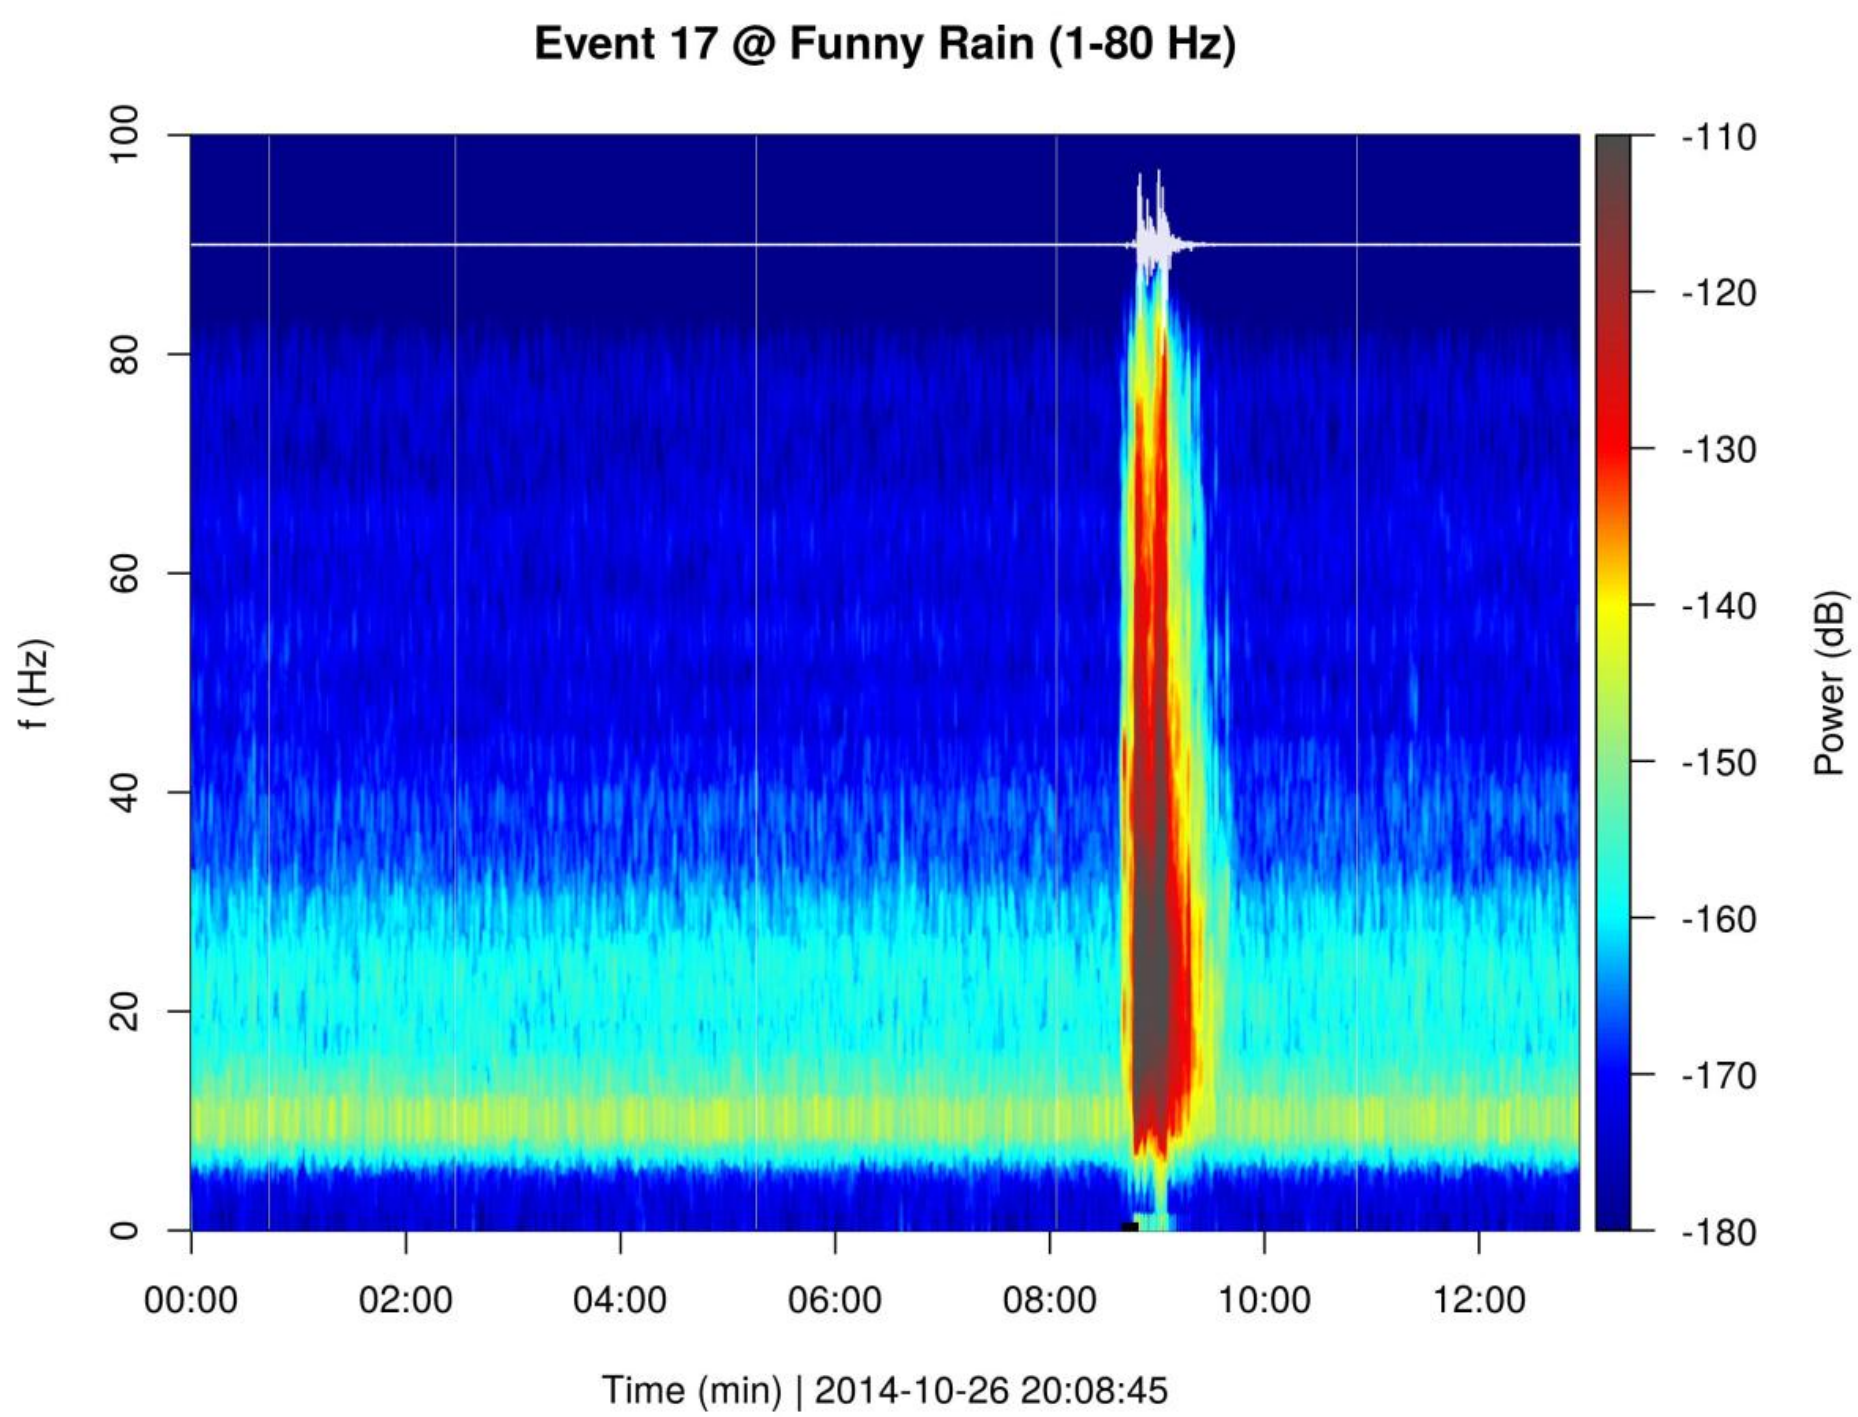

Figure 18:

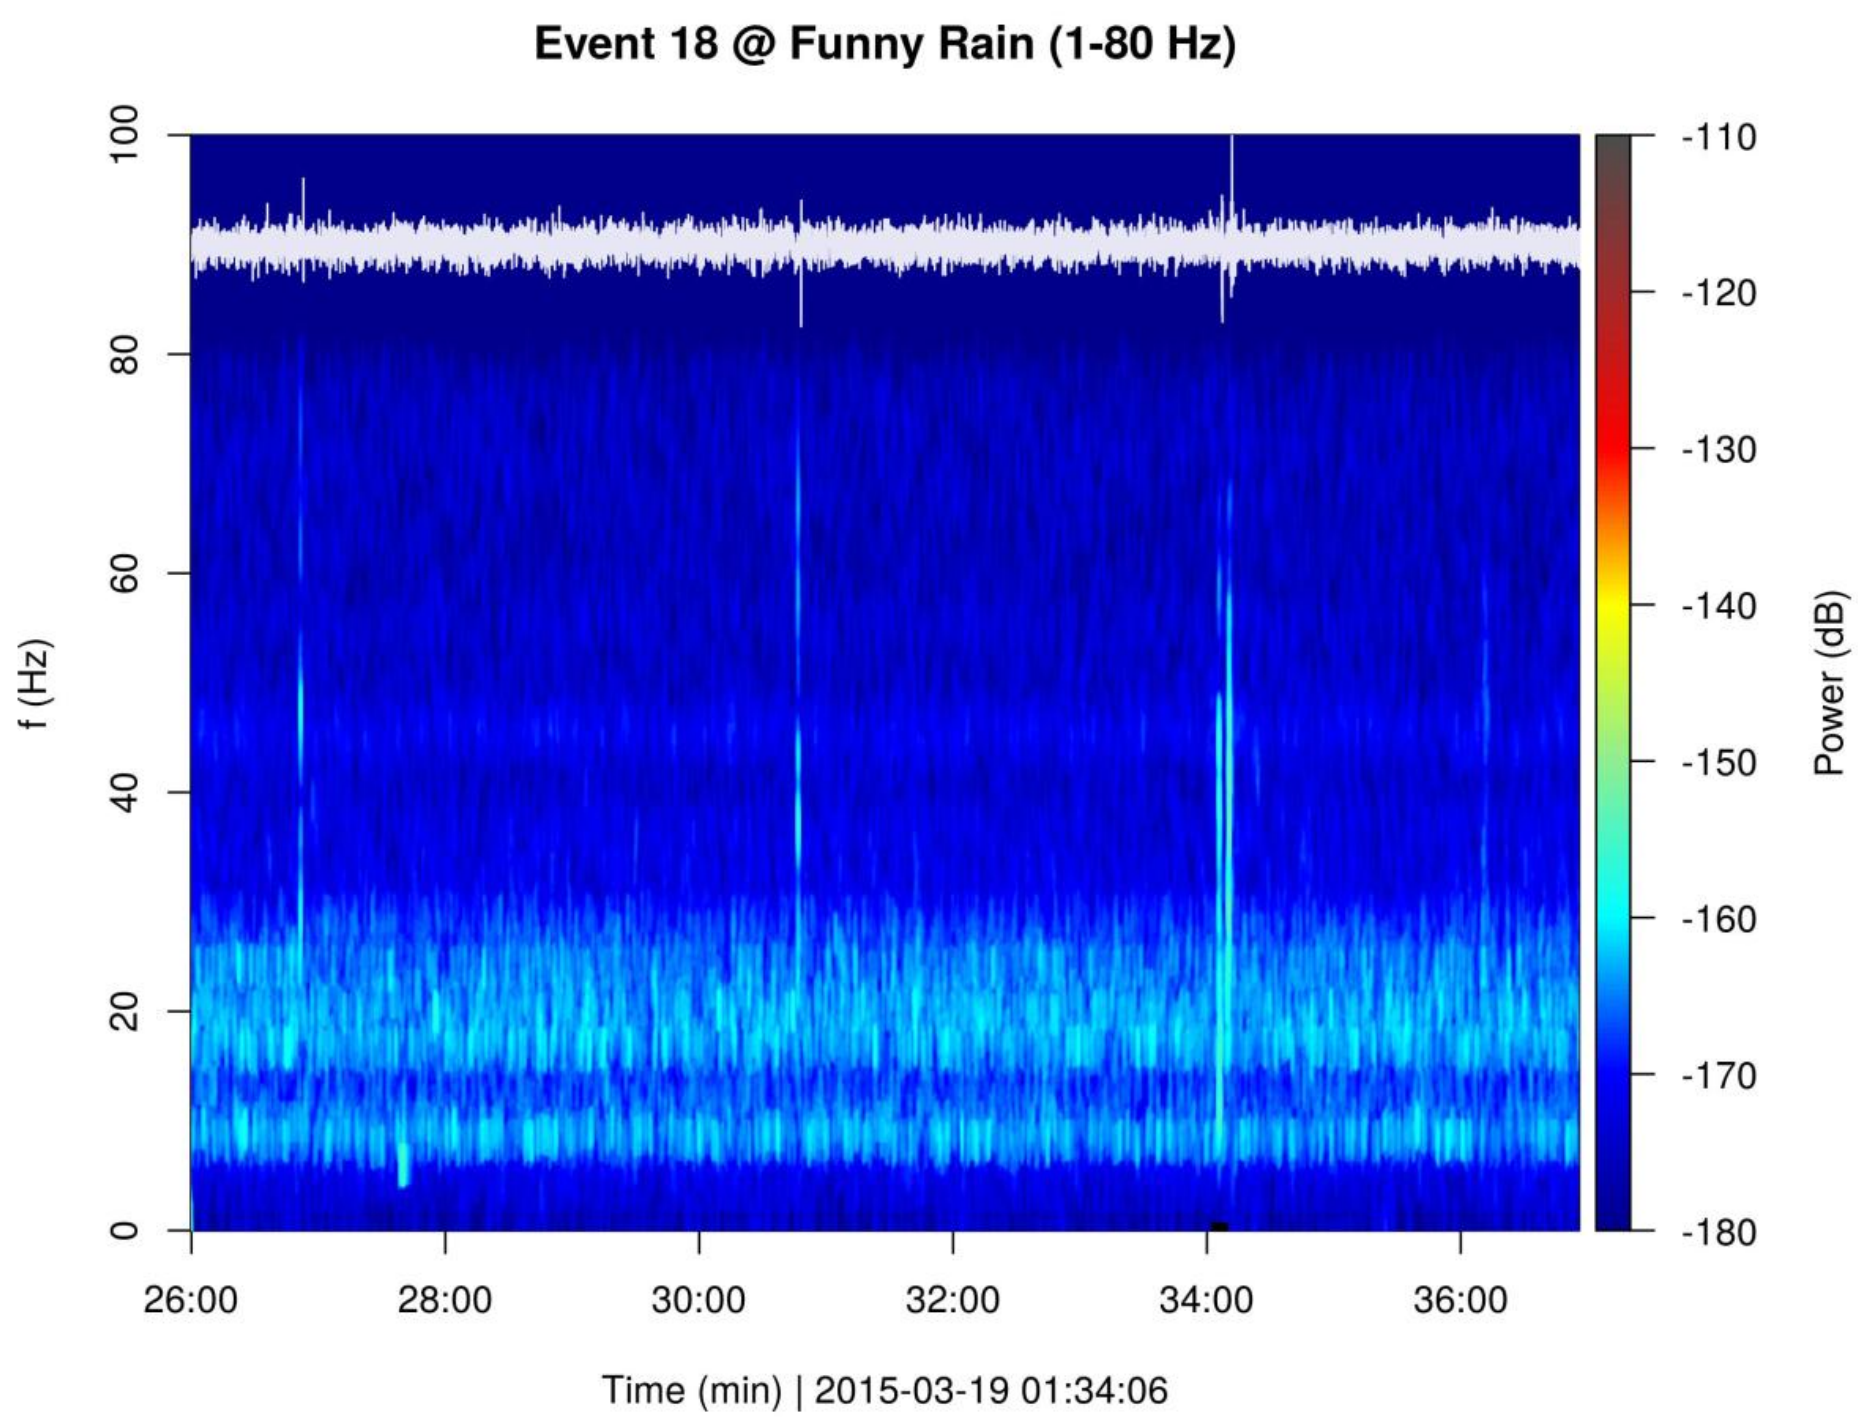

Figure 19:



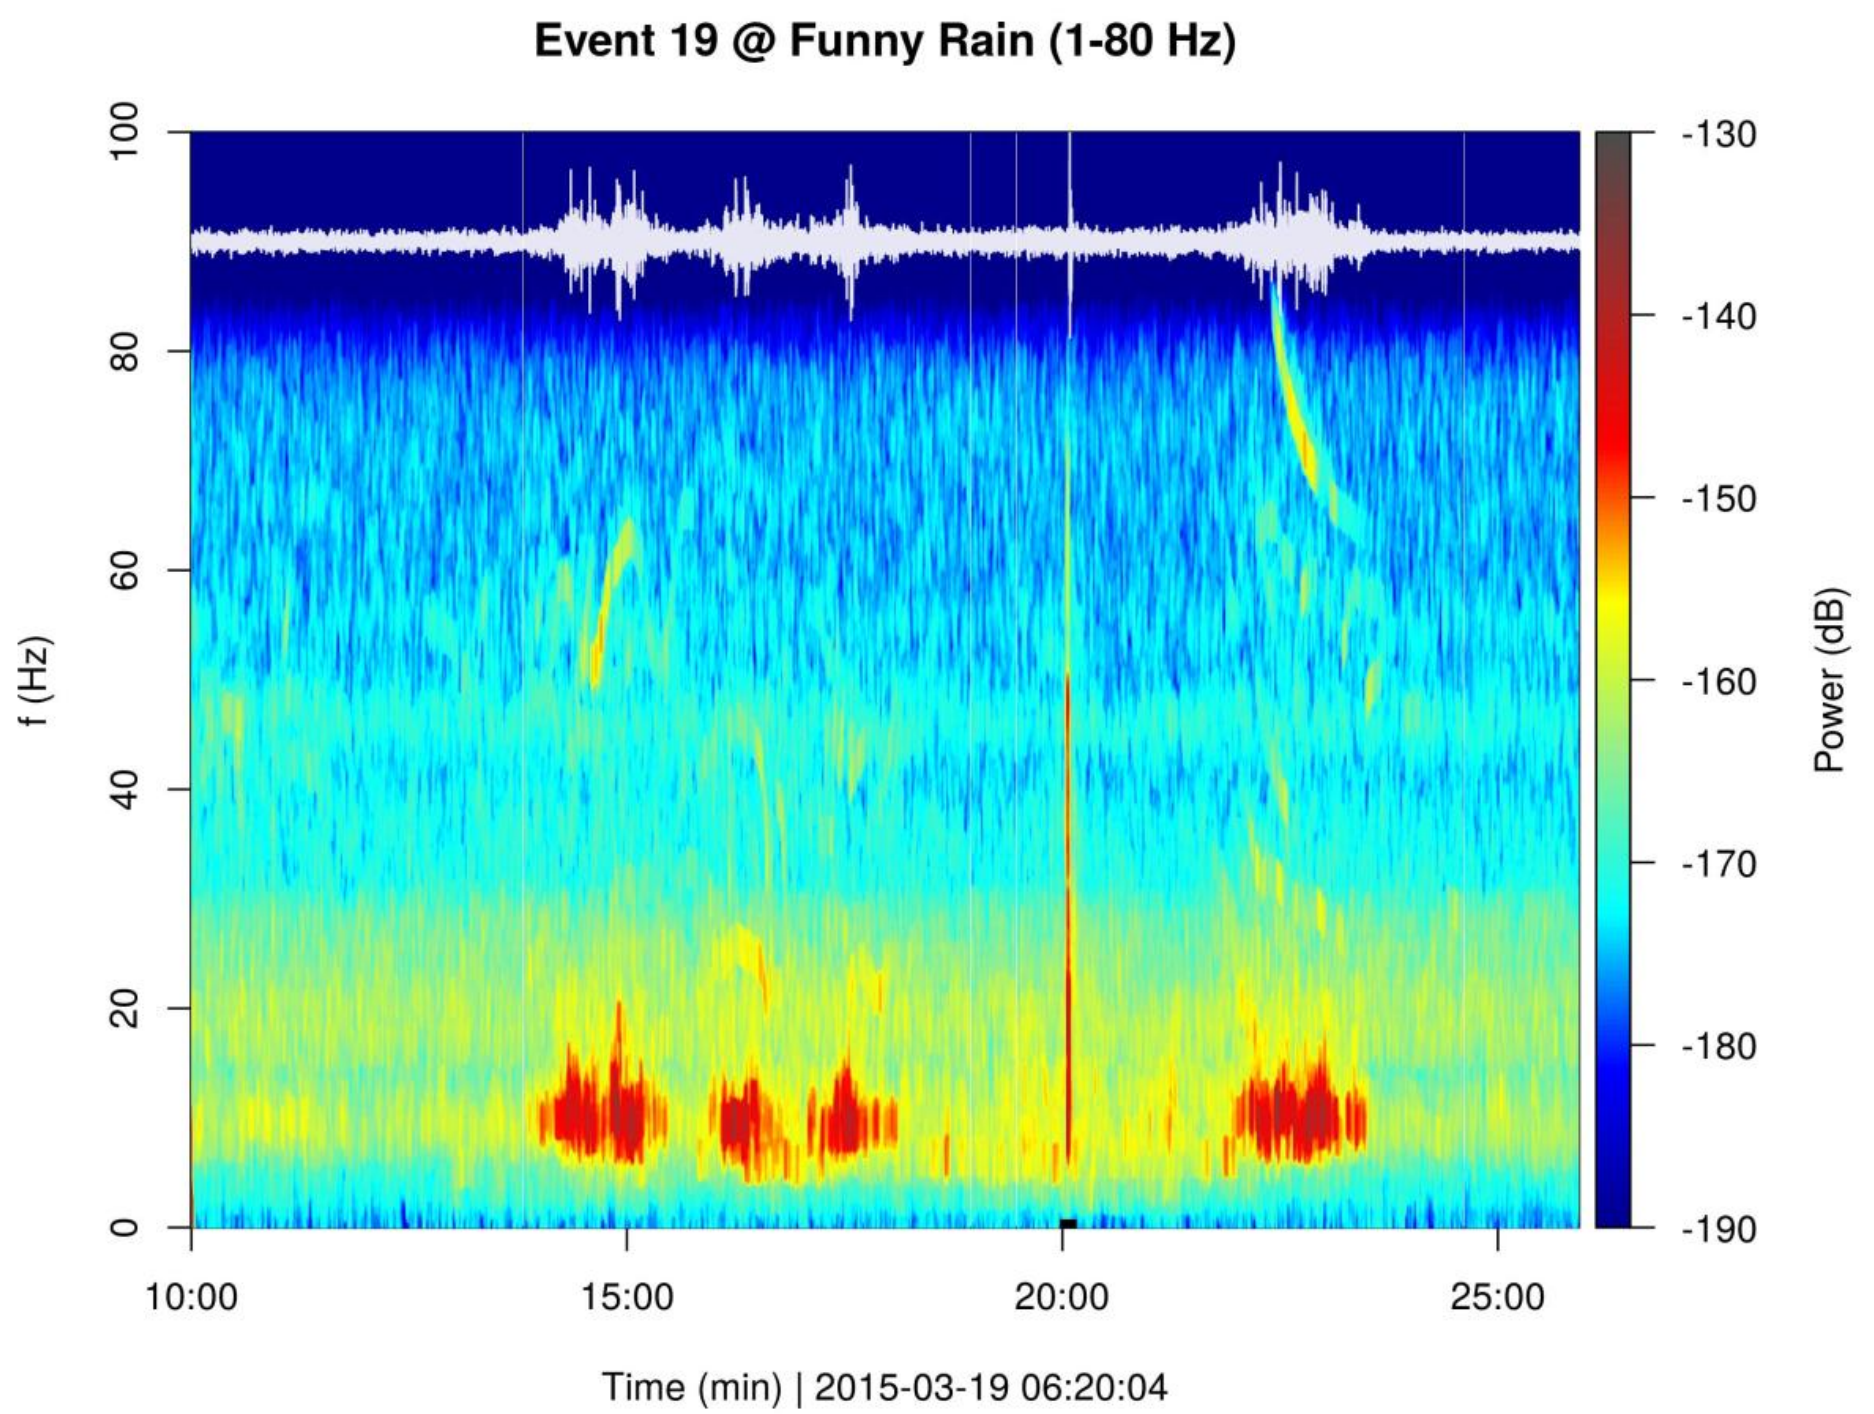

Figure 20:

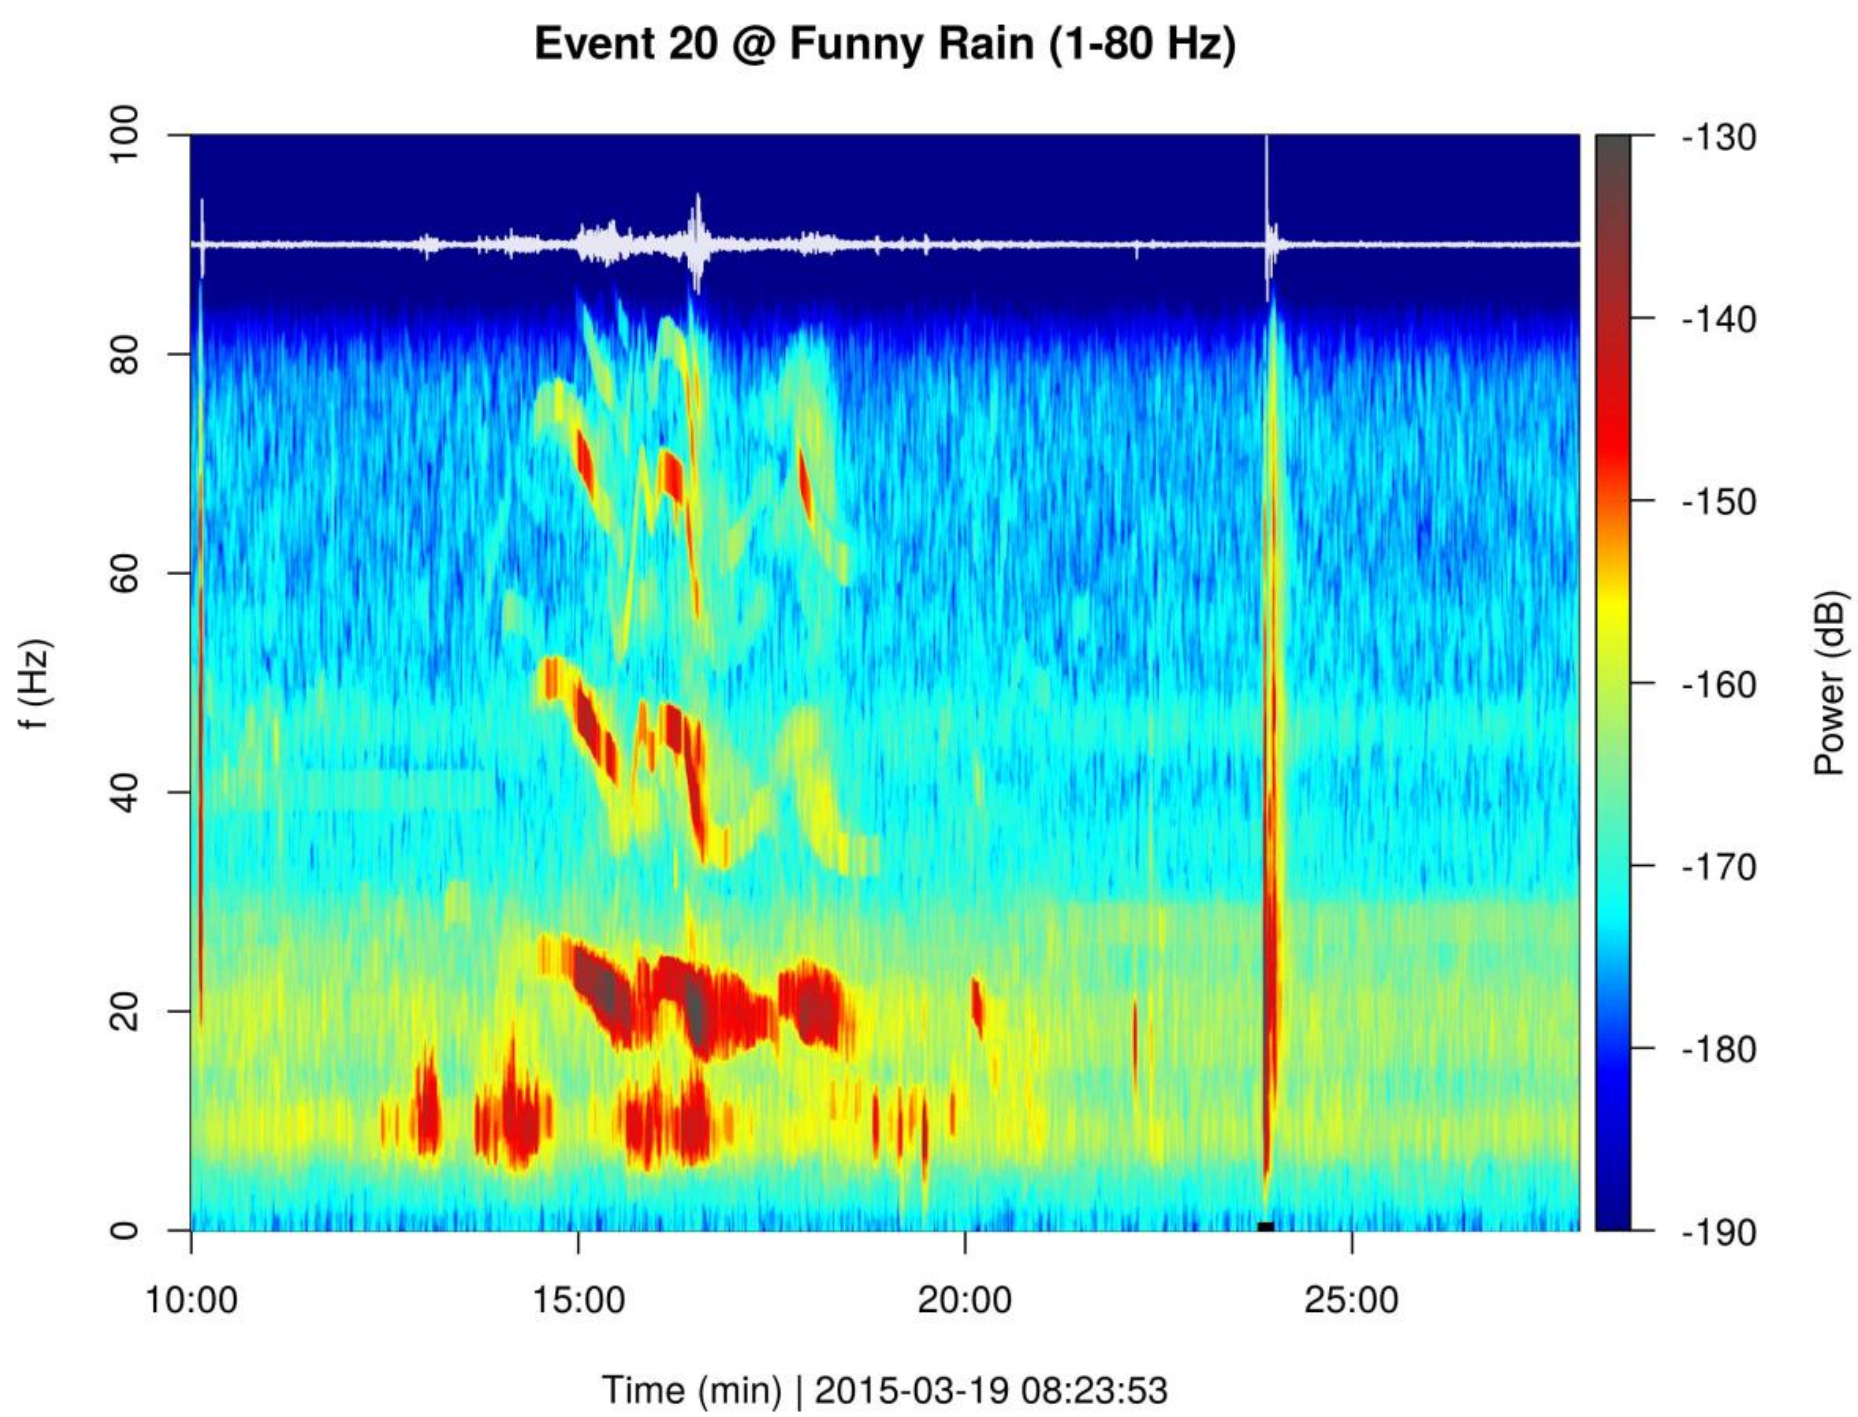

Figure 21:



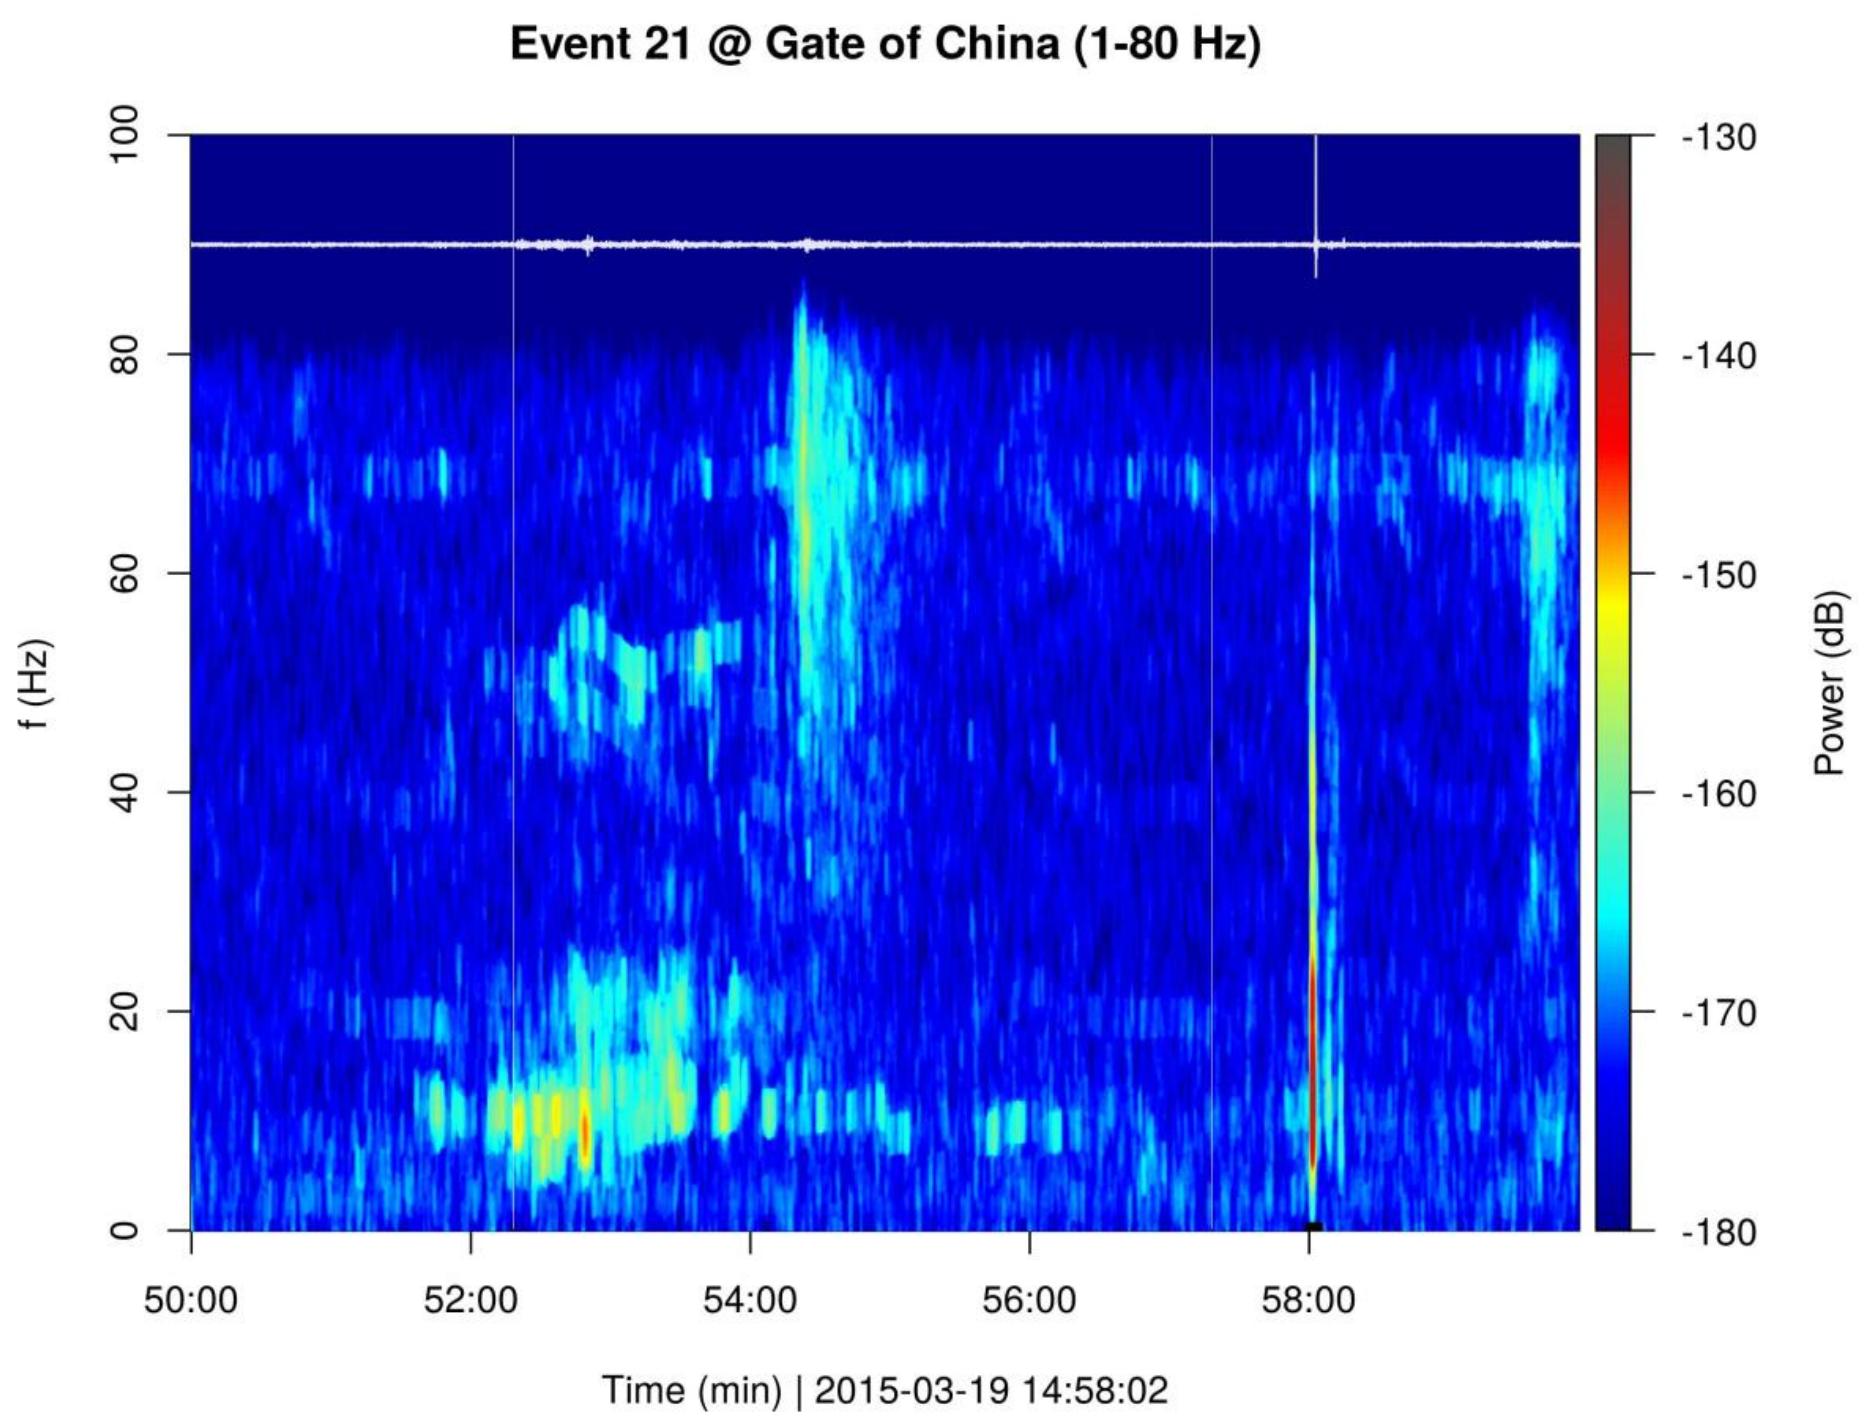

Figure 22:

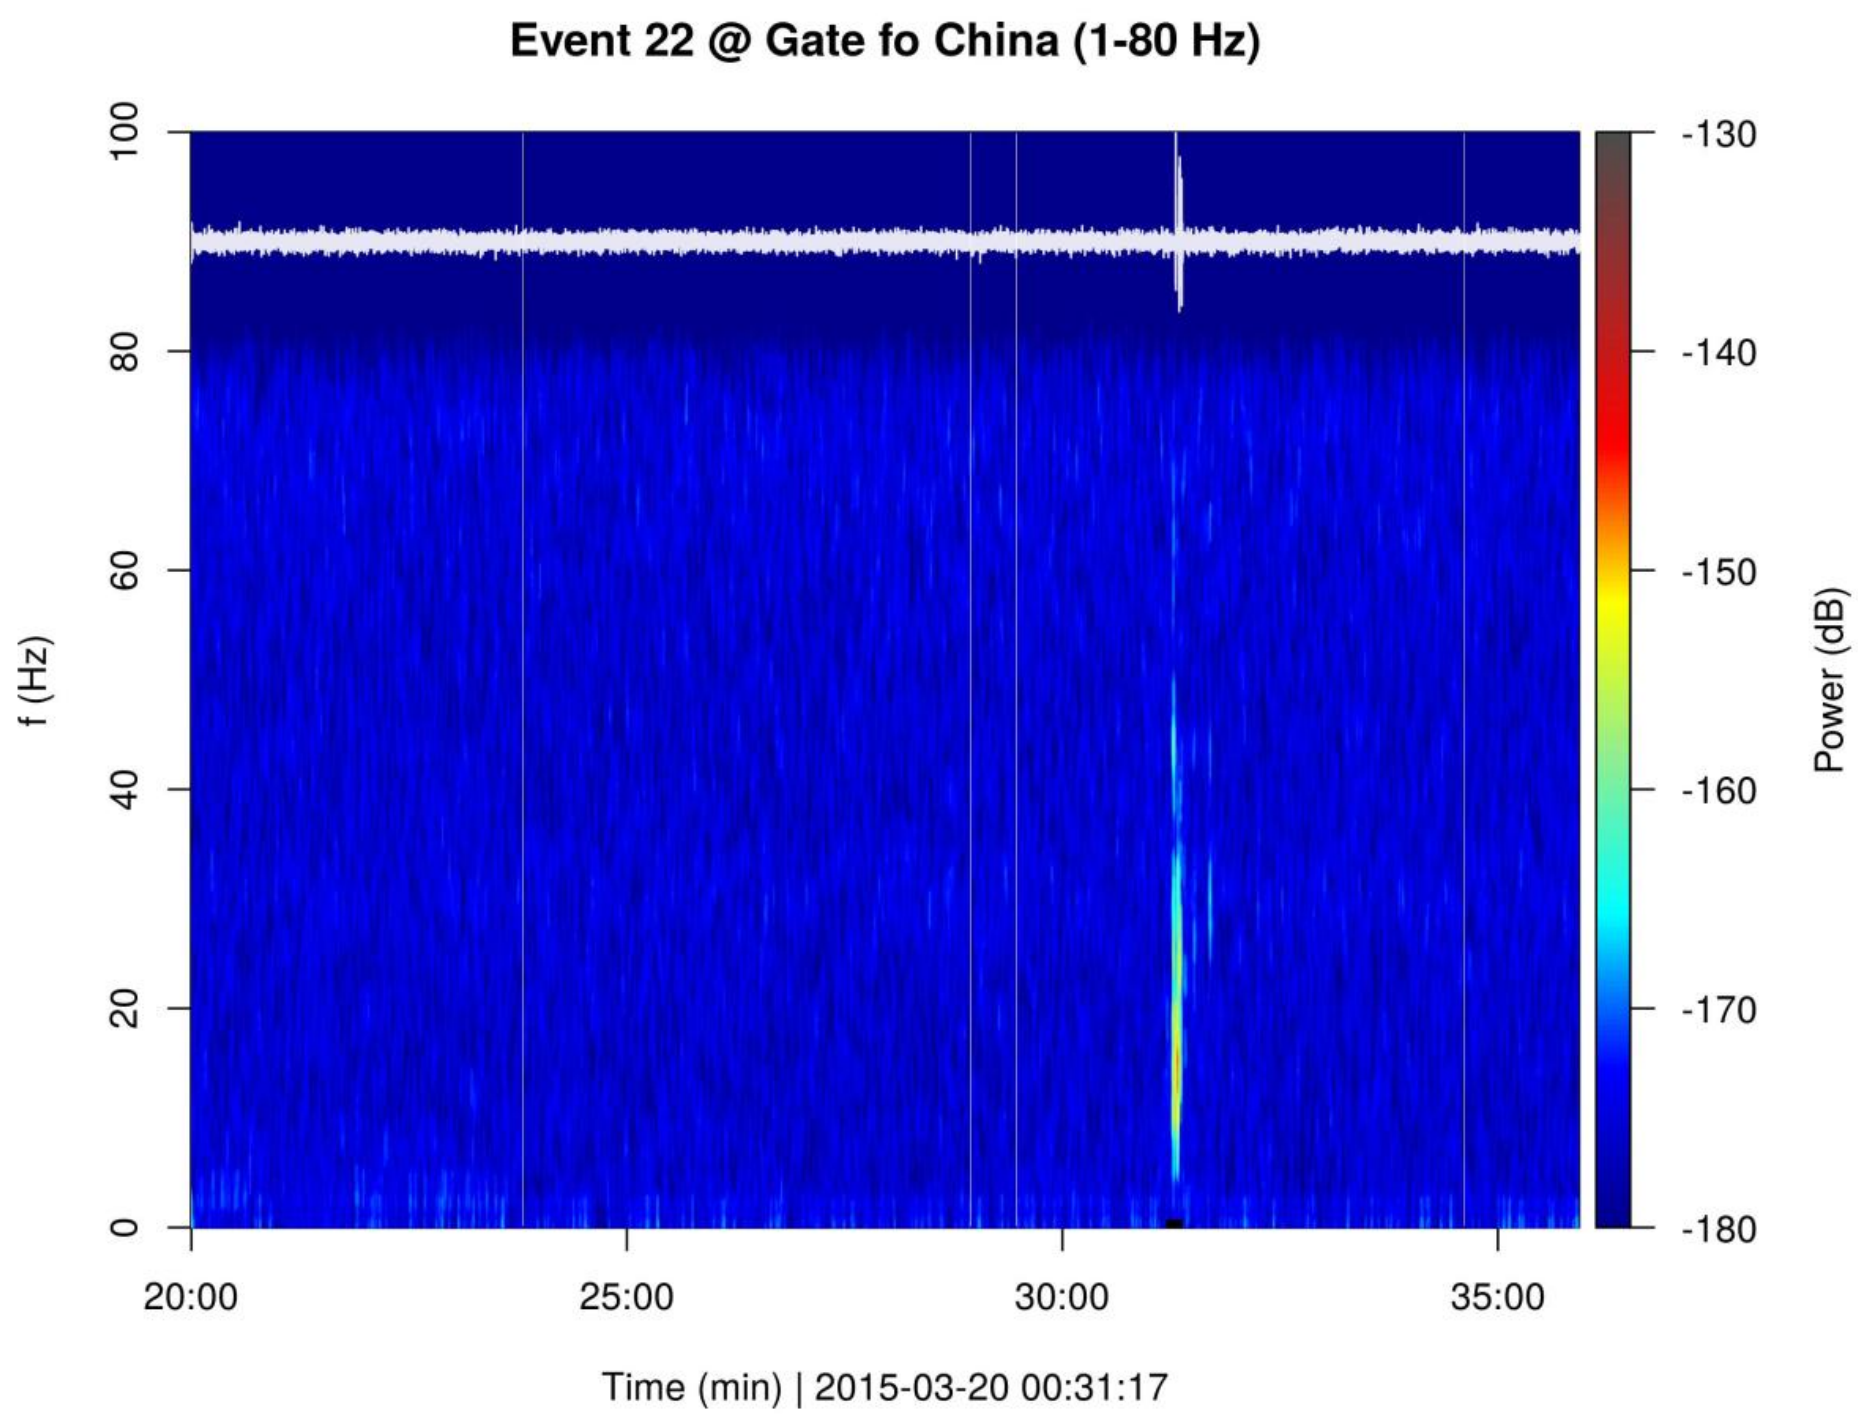

Figure 23:



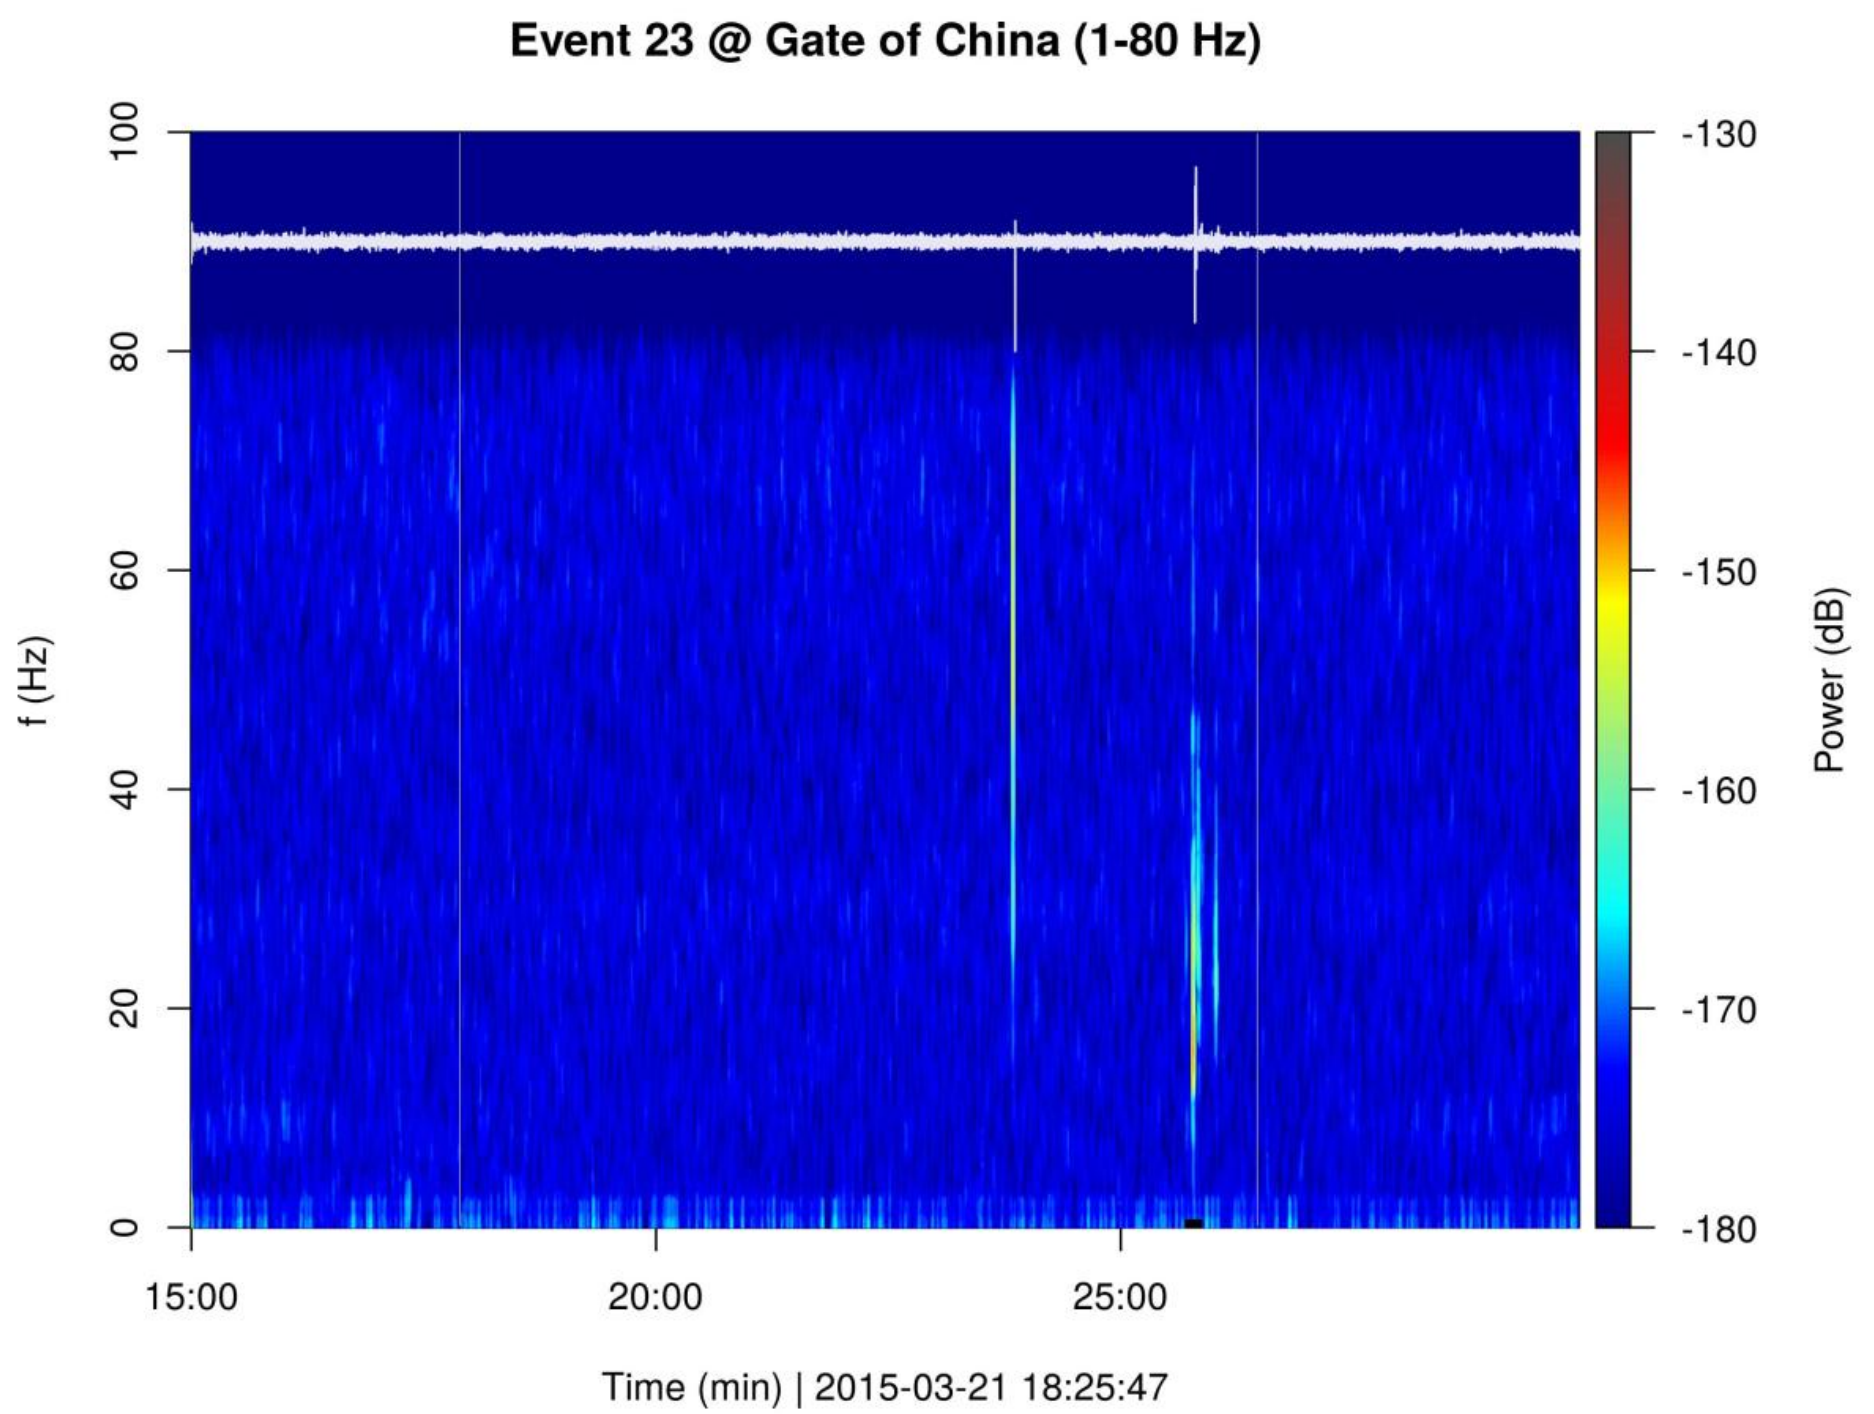

Figure 24:

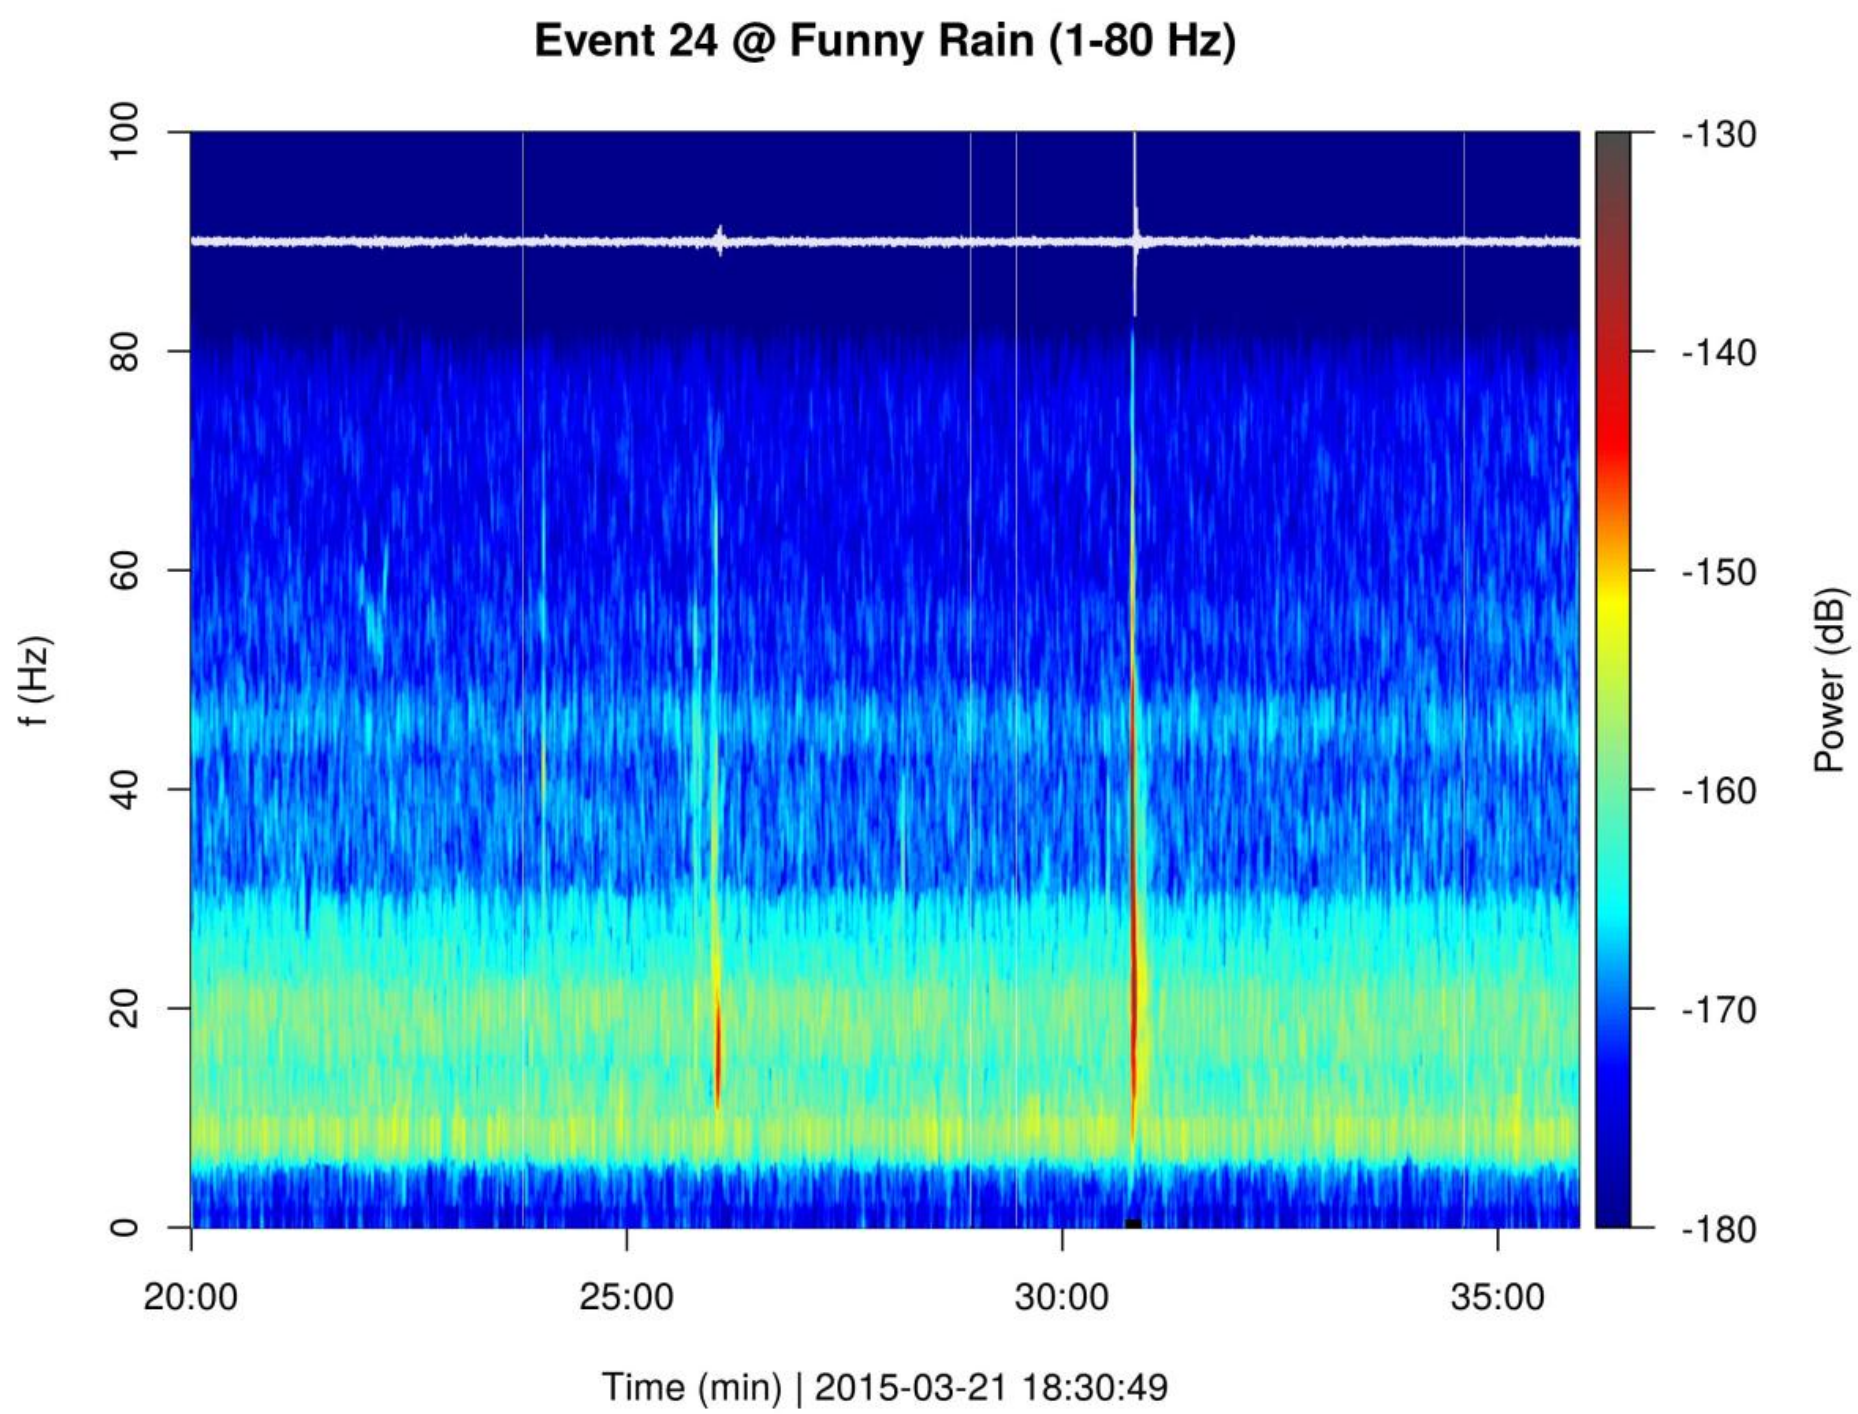

Figure 25:



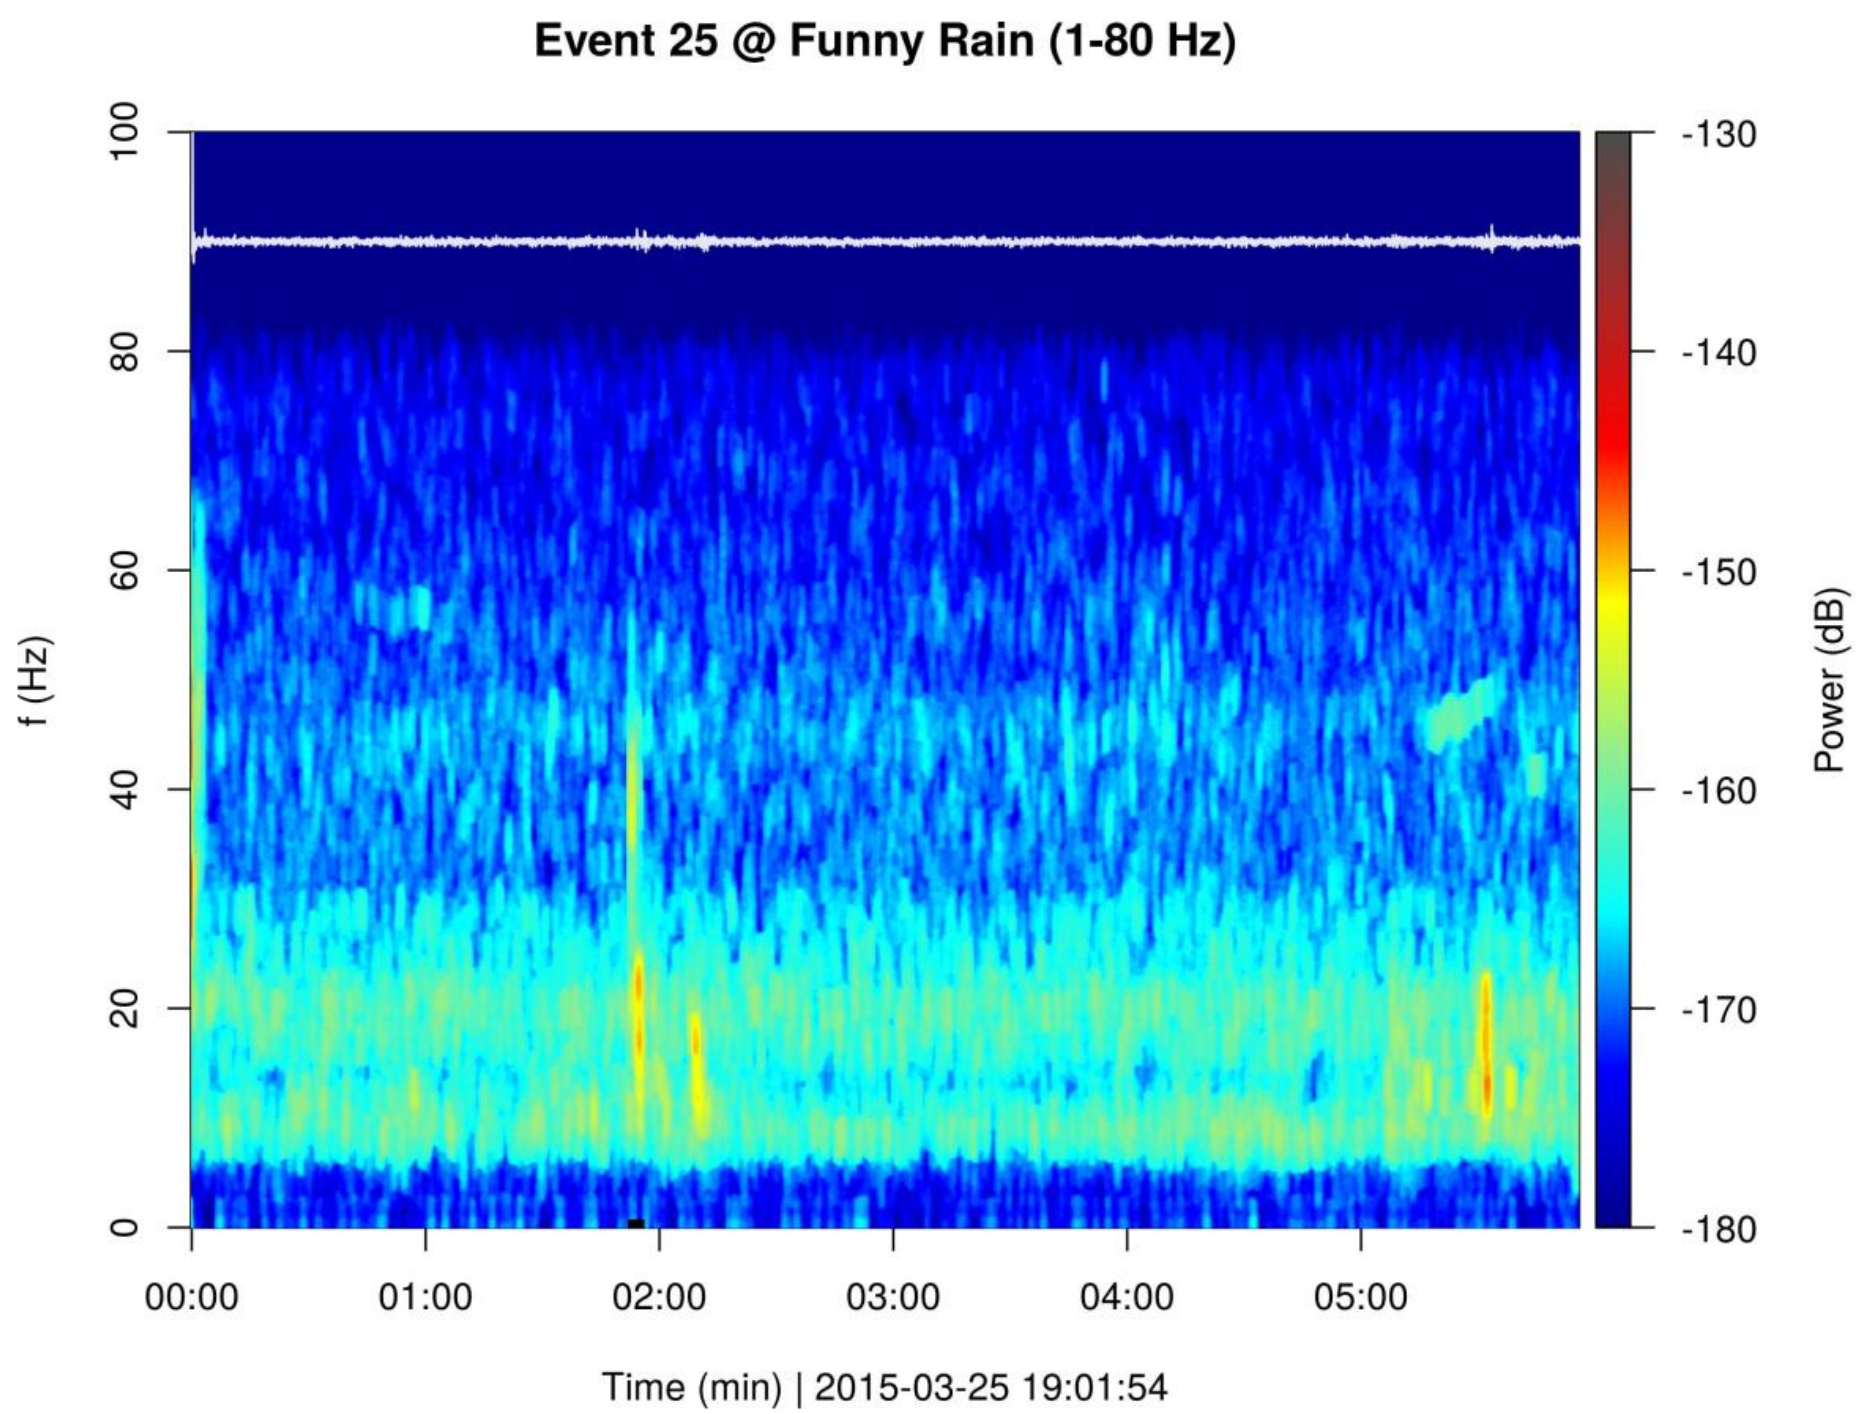

Figure 26:

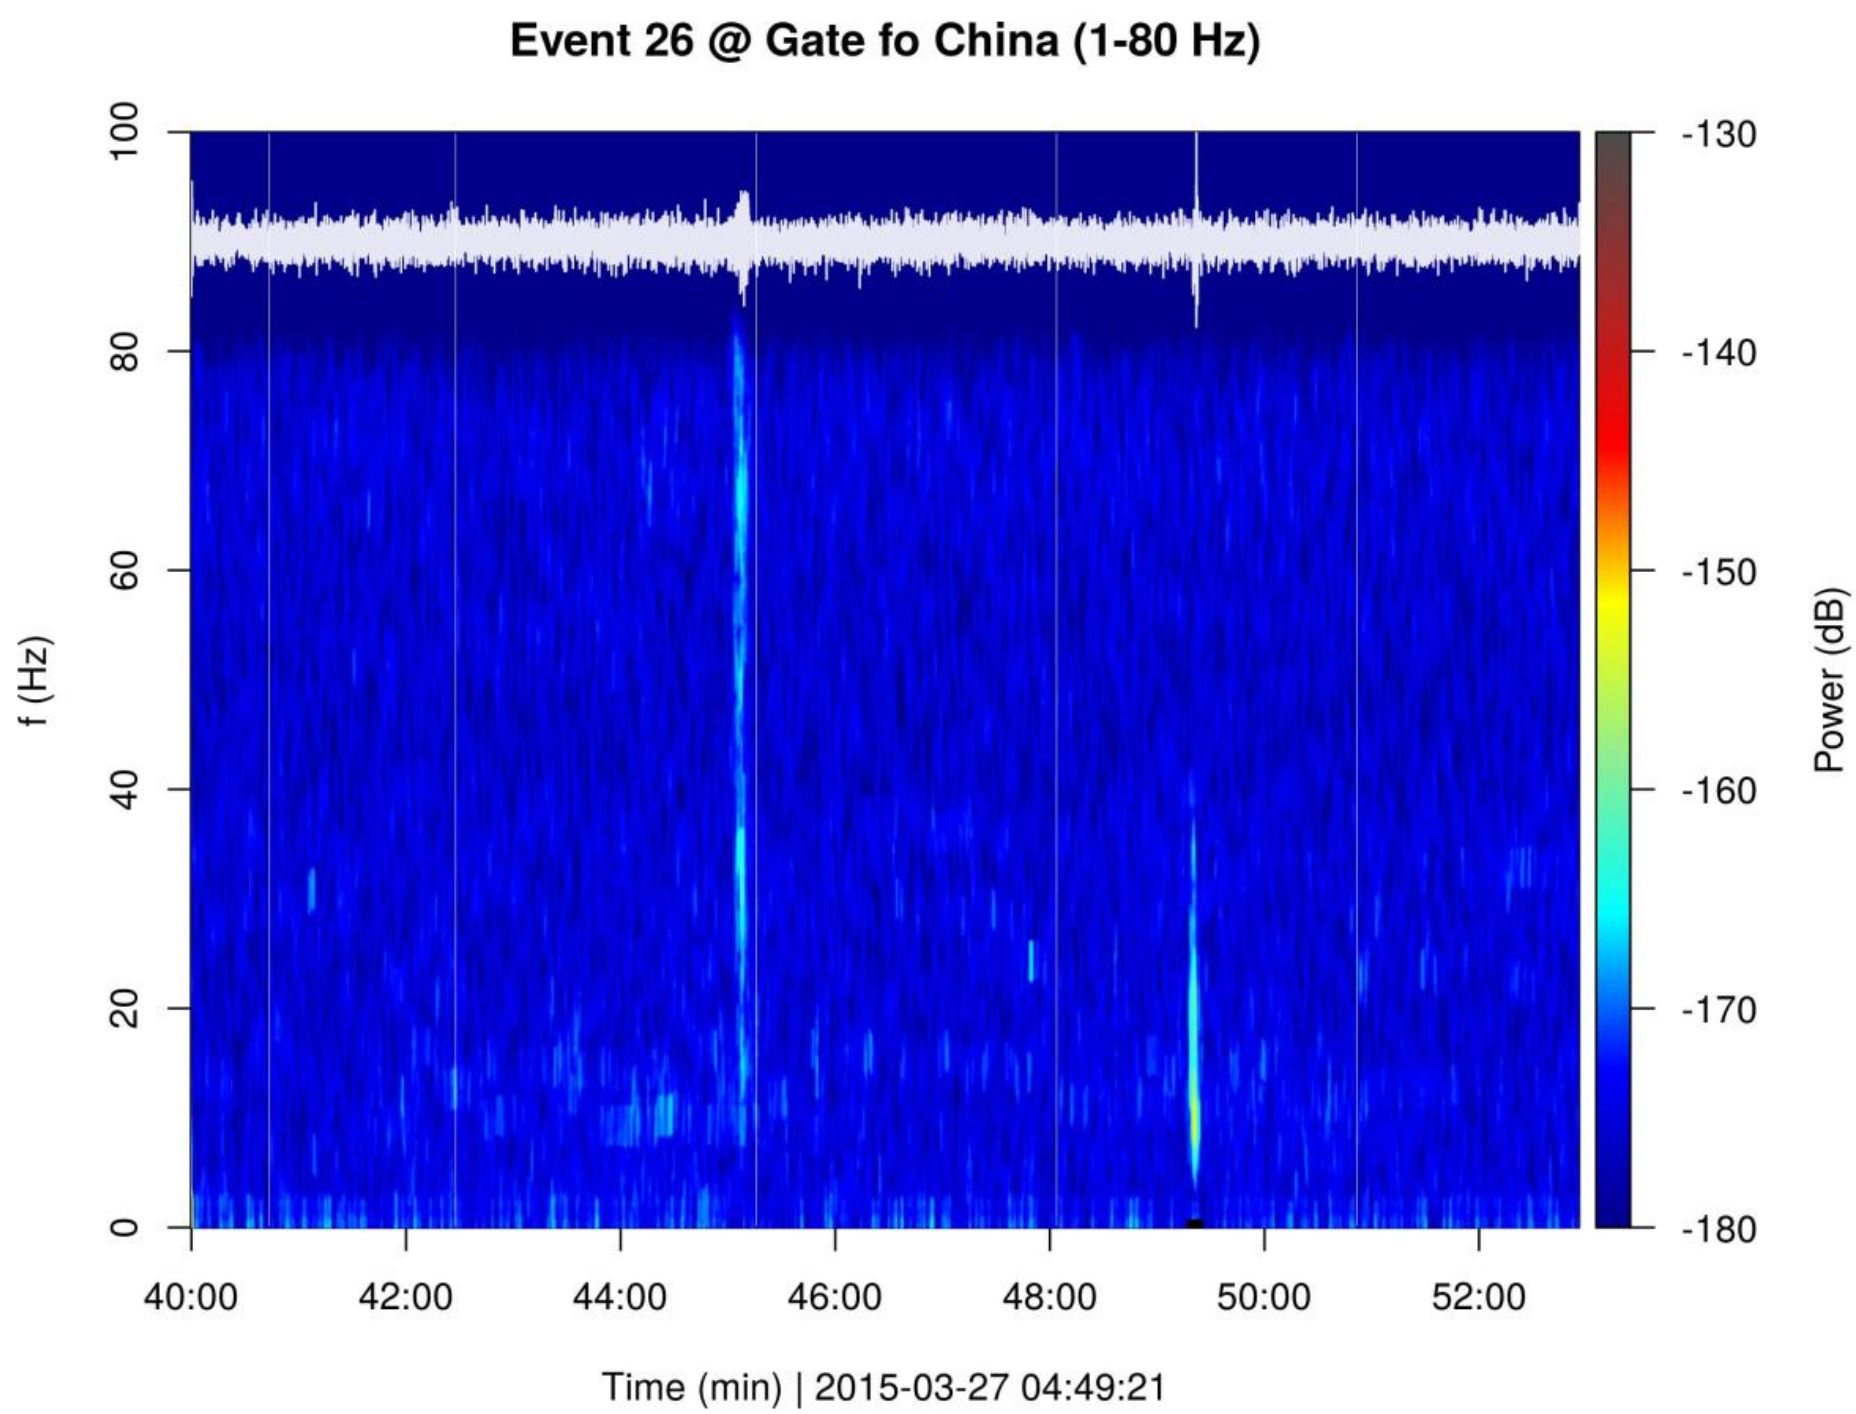

Figure 27:



Event 26 @ Funny Rain (1-80 Hz)

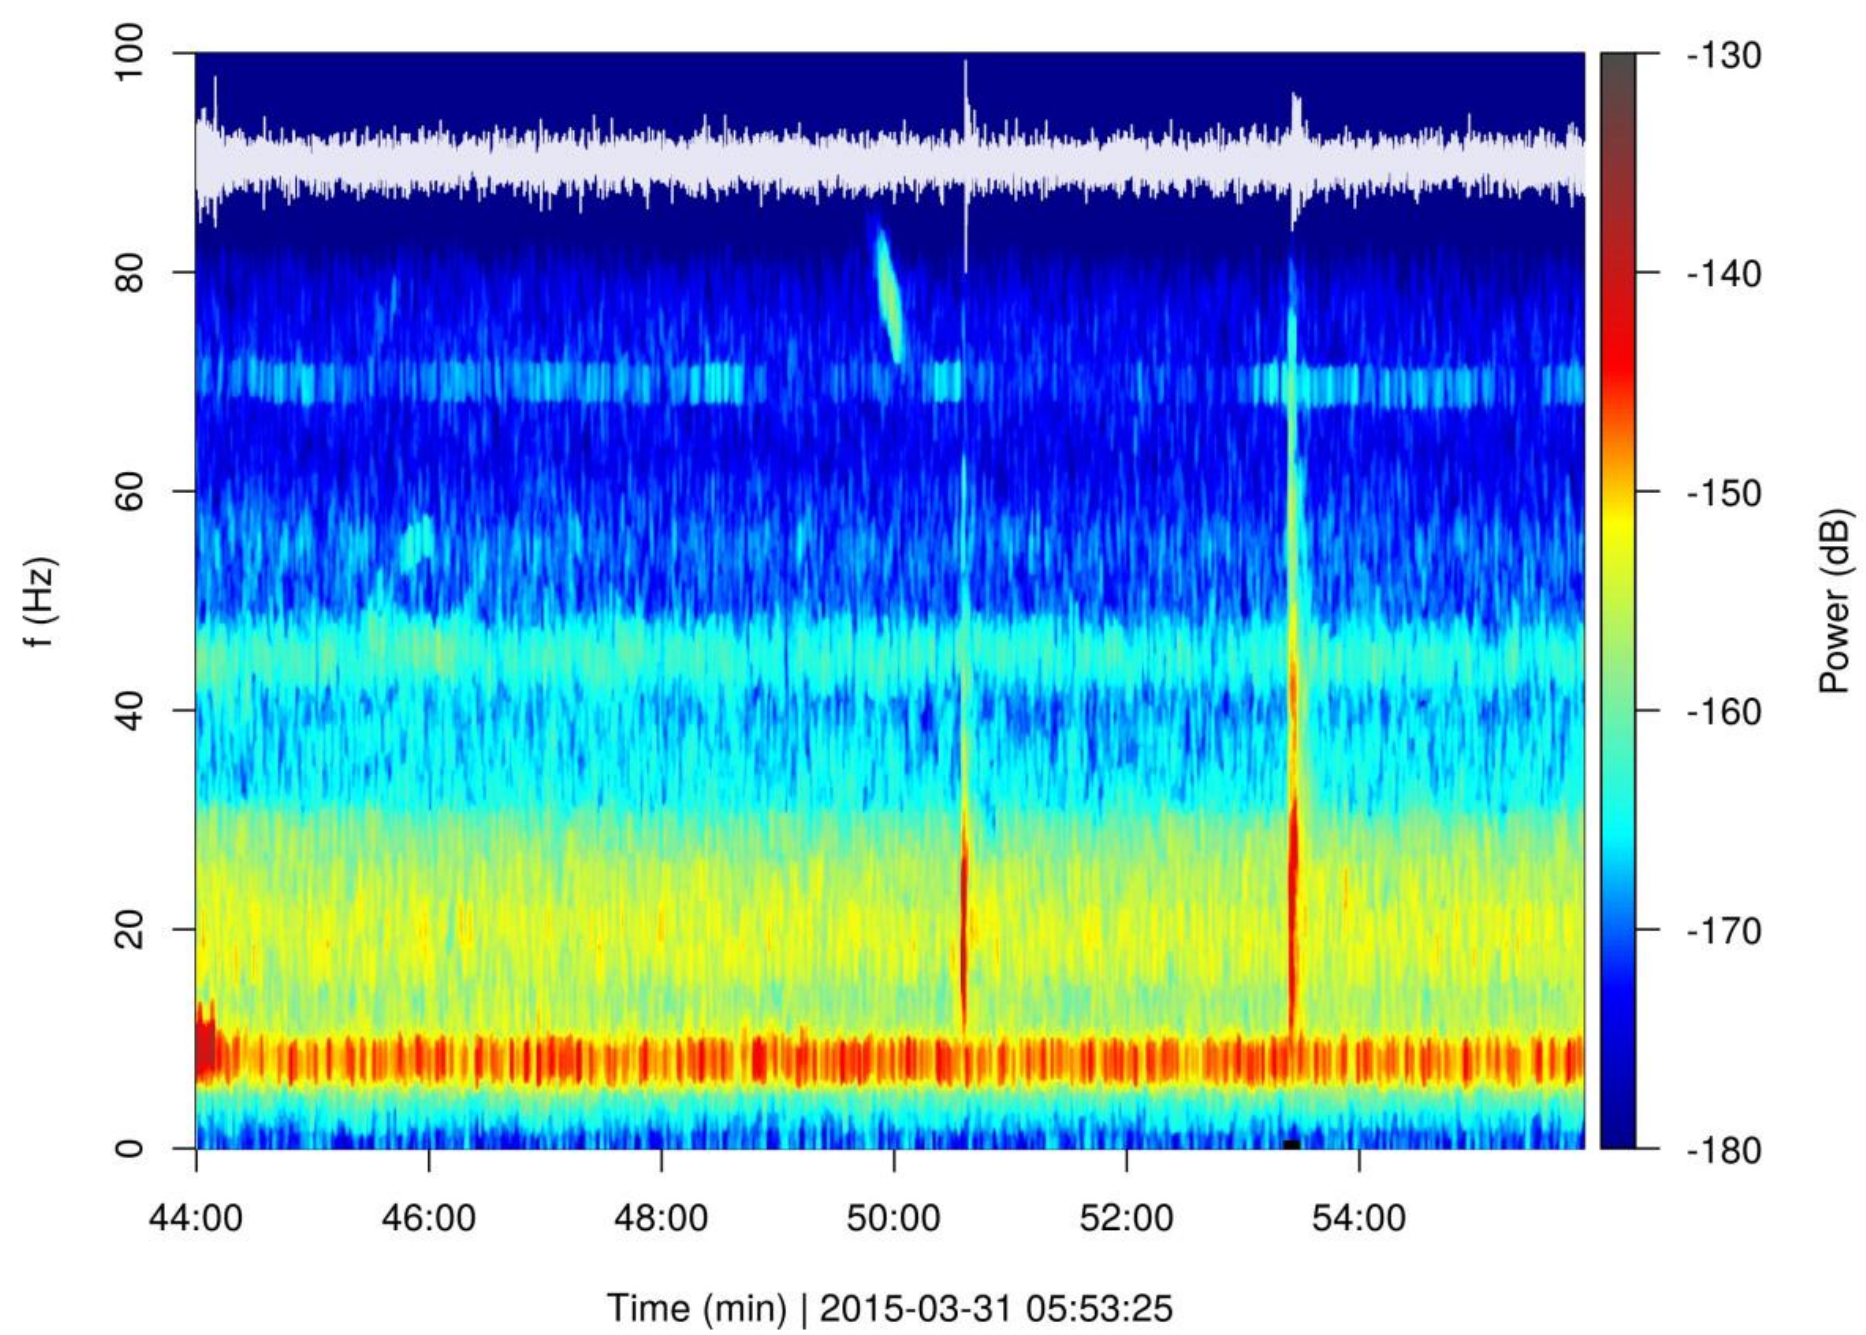

Figure 28:

Event 28 @ Funny Rain (1-80 Hz)

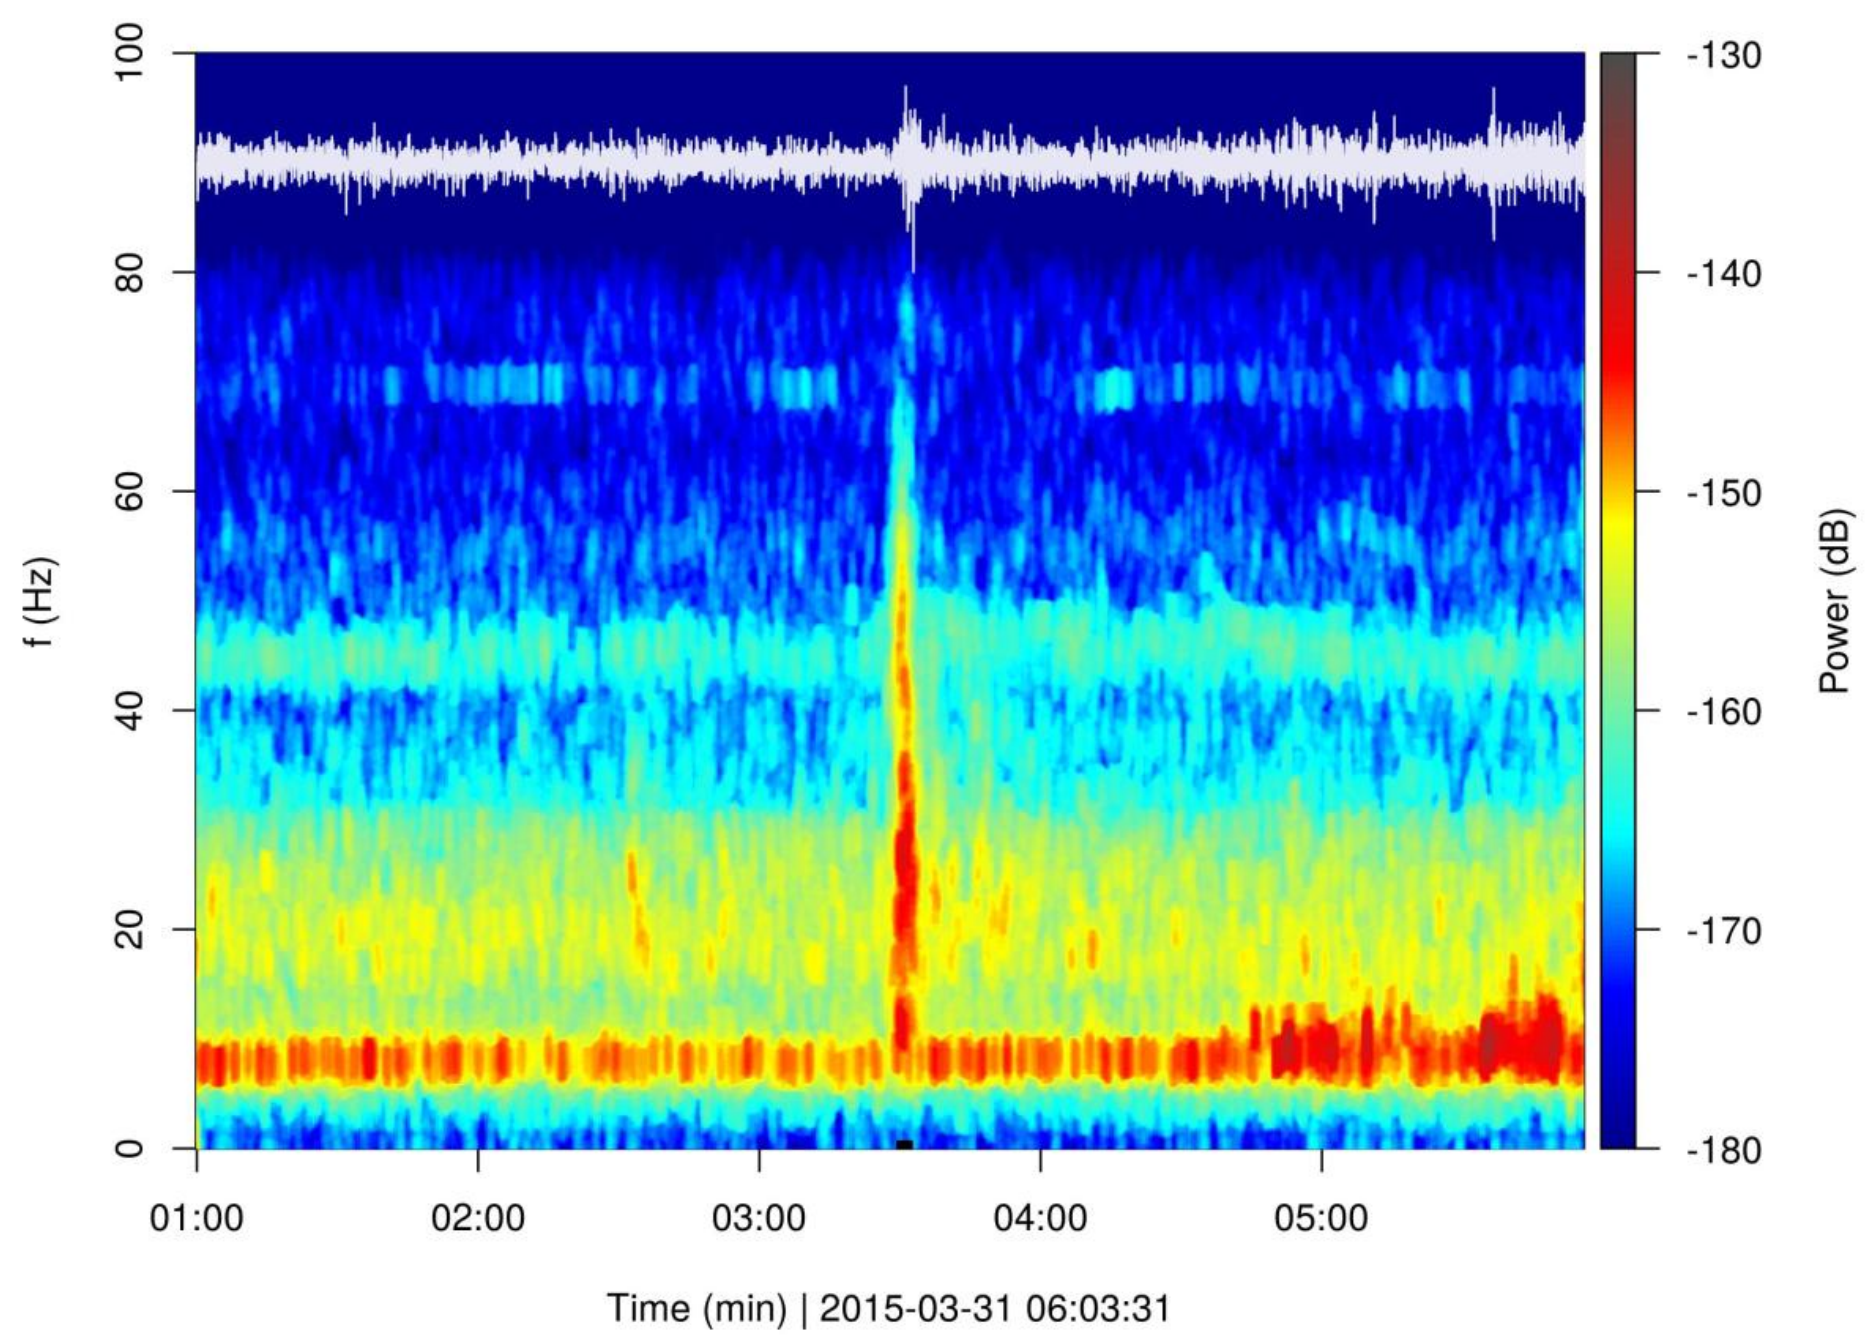

Figure 29:



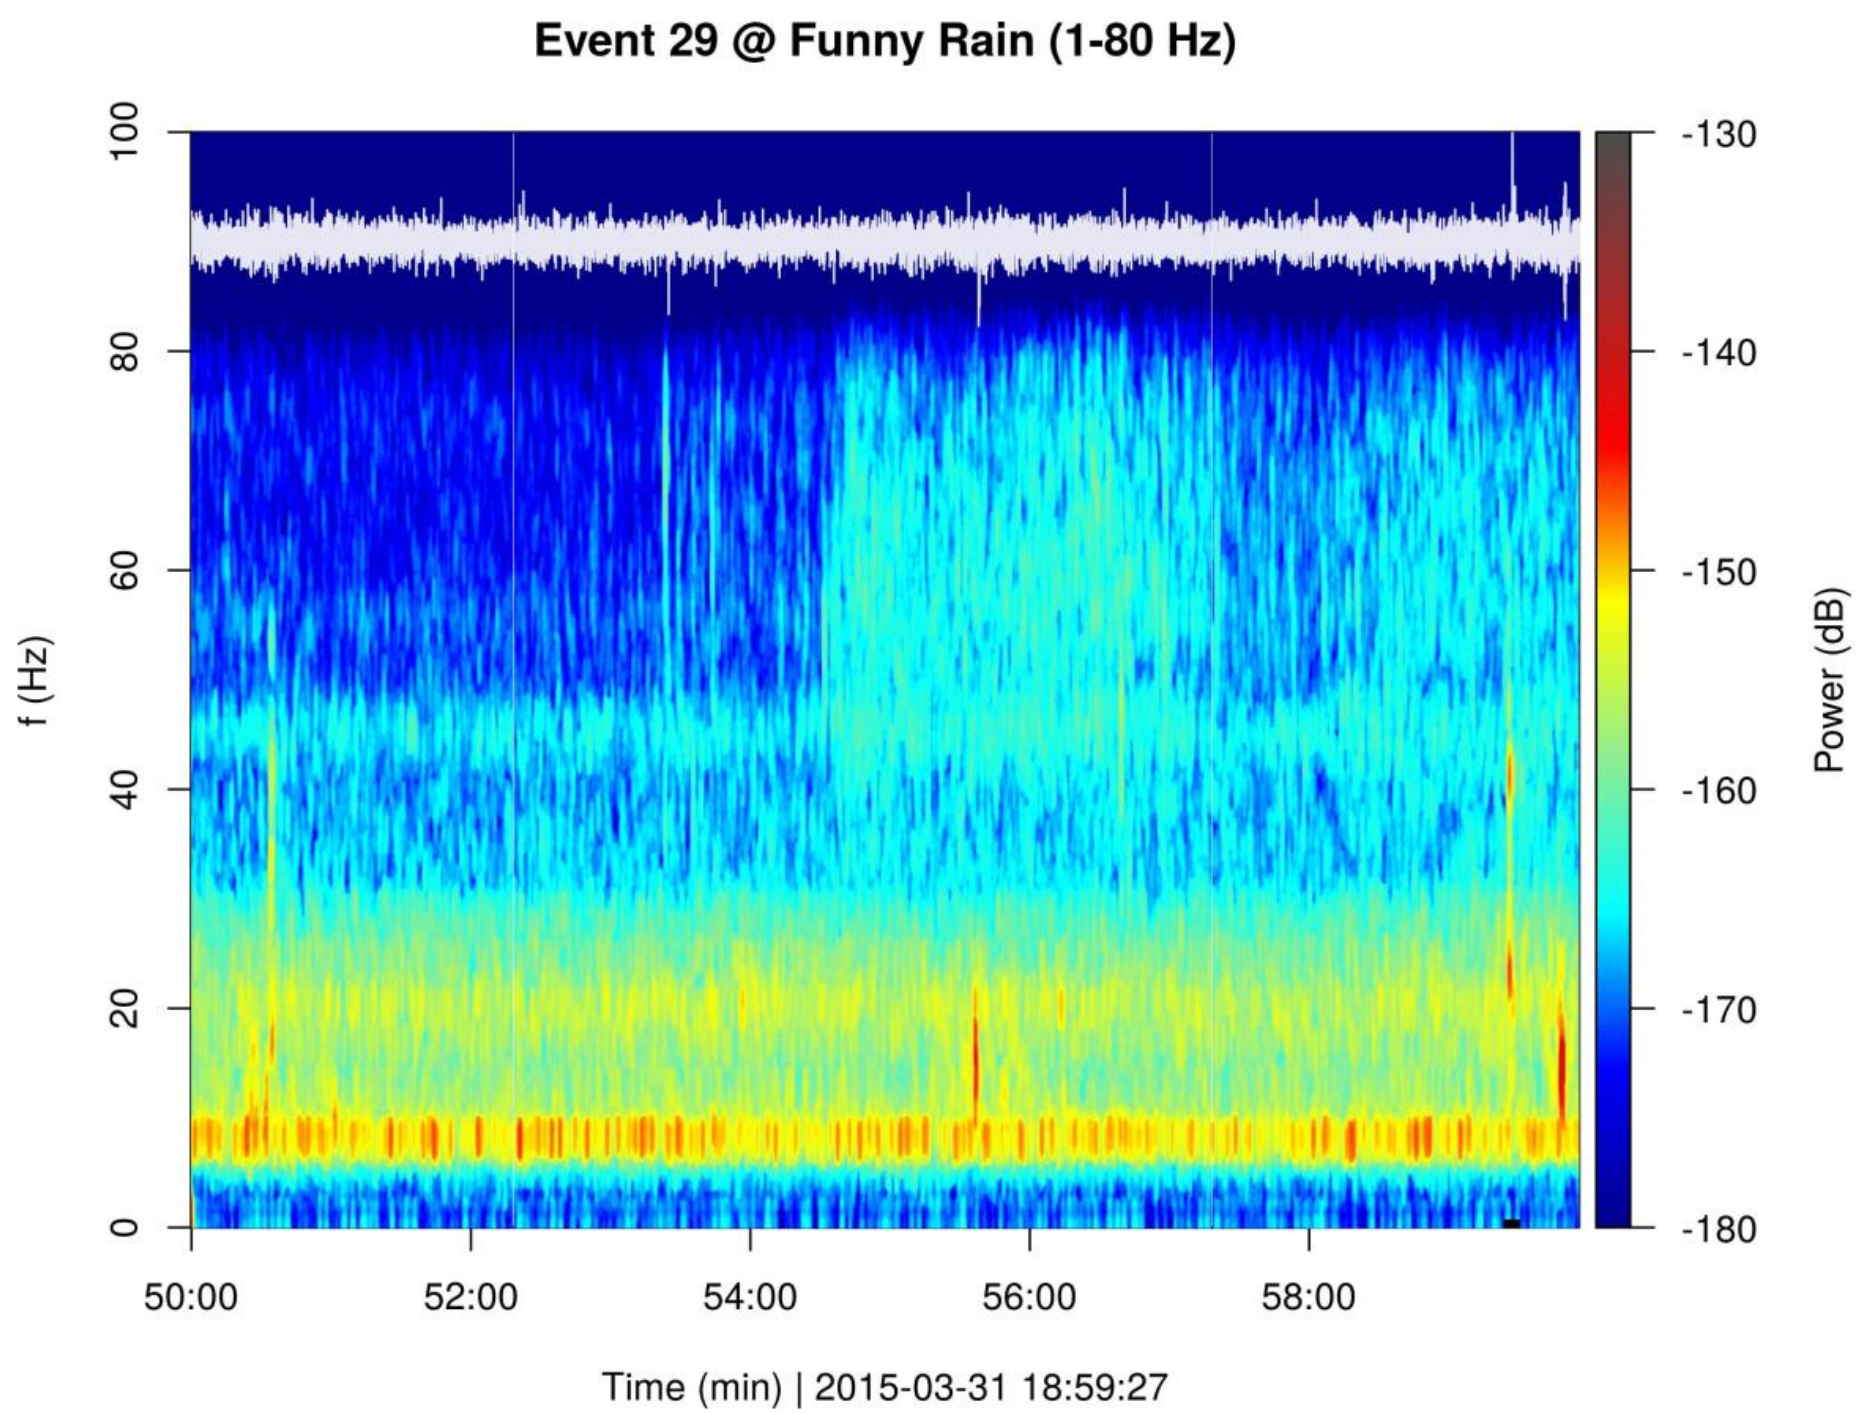

Figure 30:

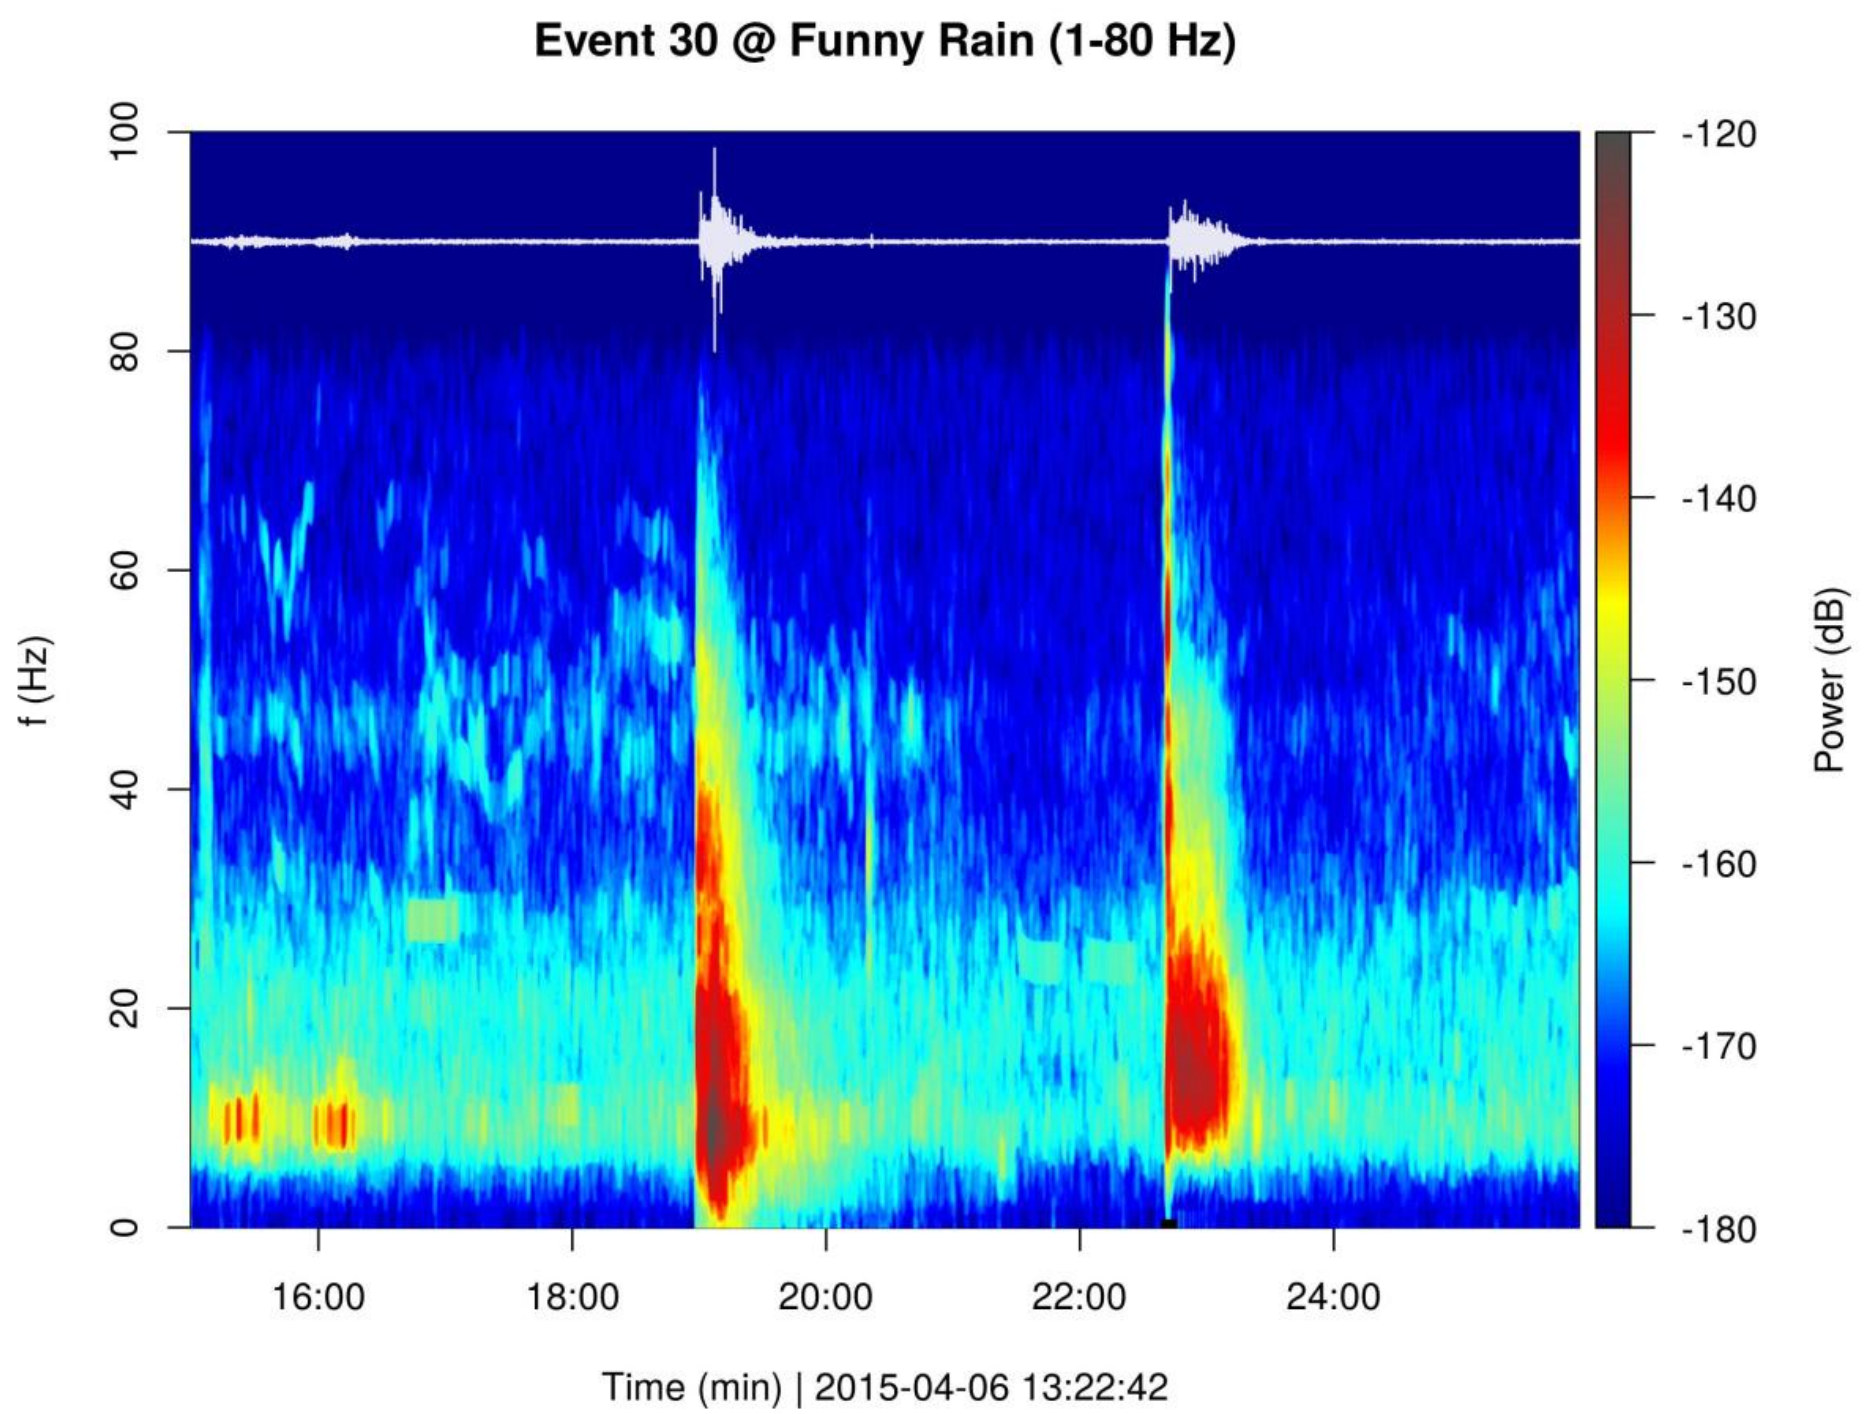

Figure 31:



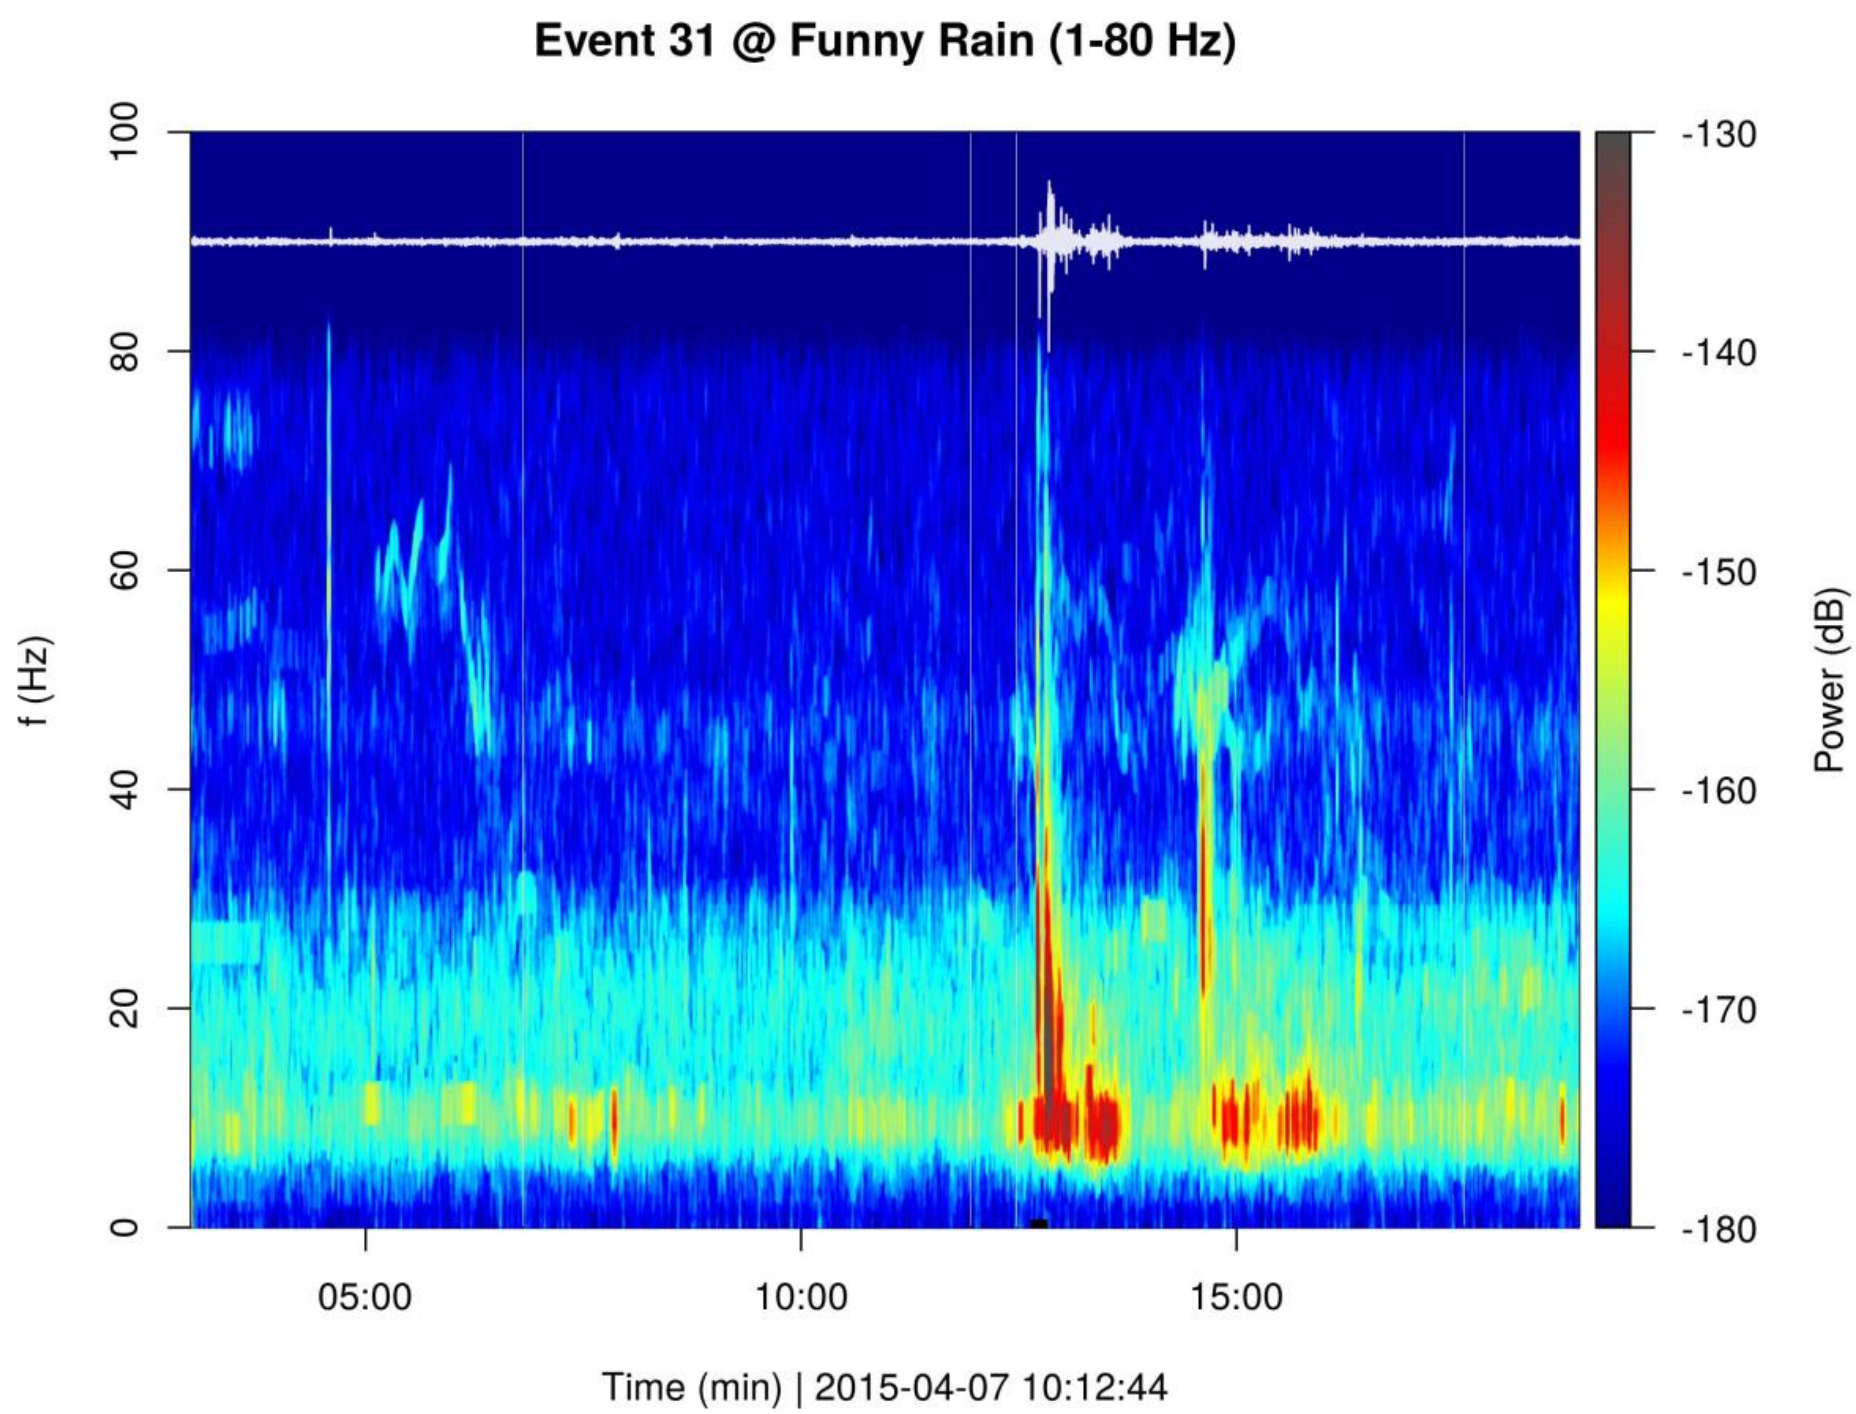

Figure 32:

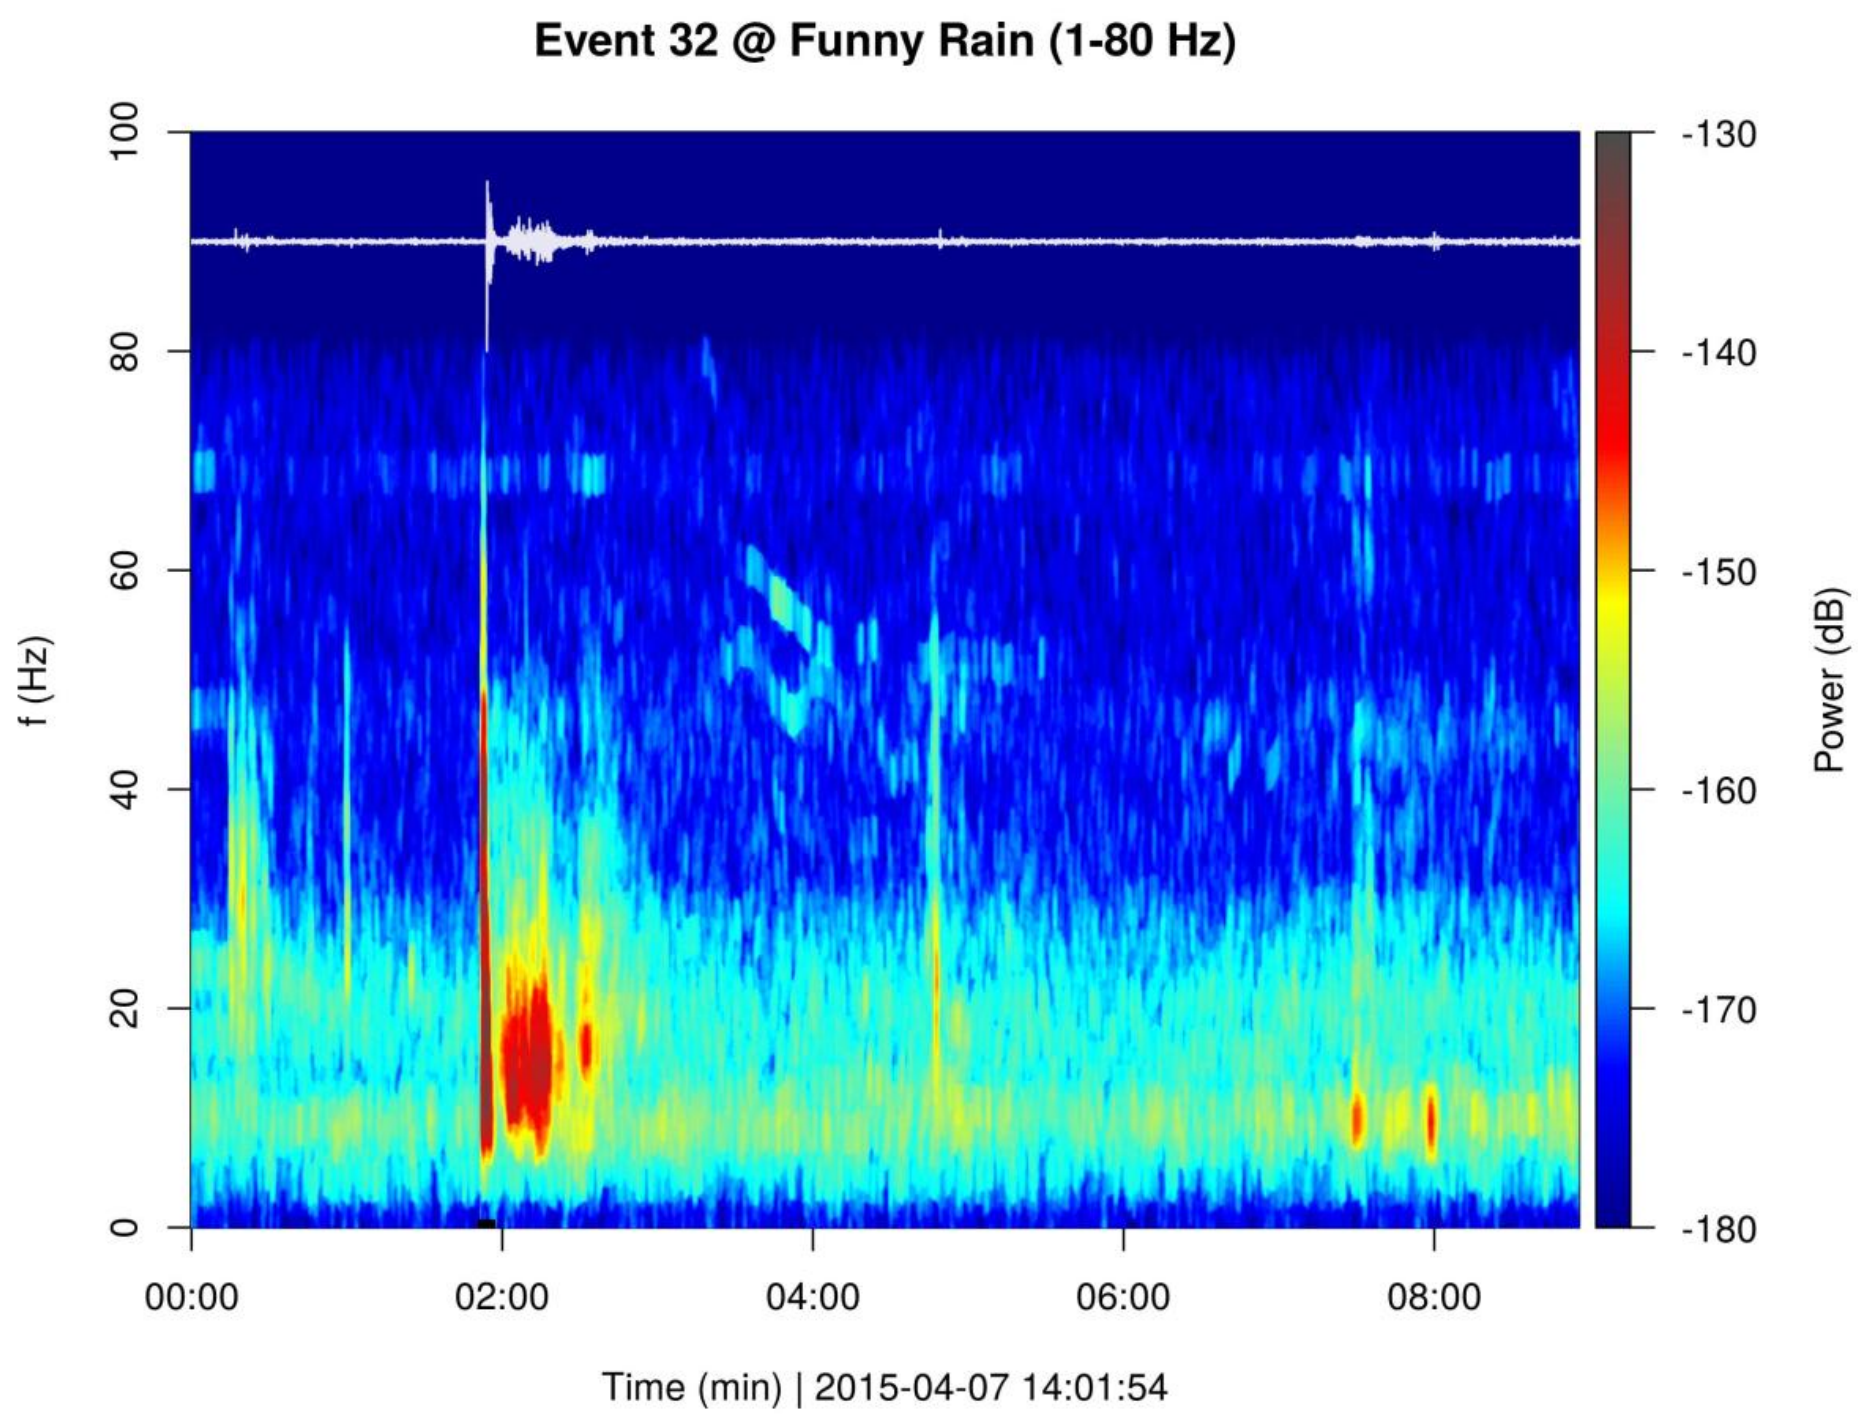

Figure 33:



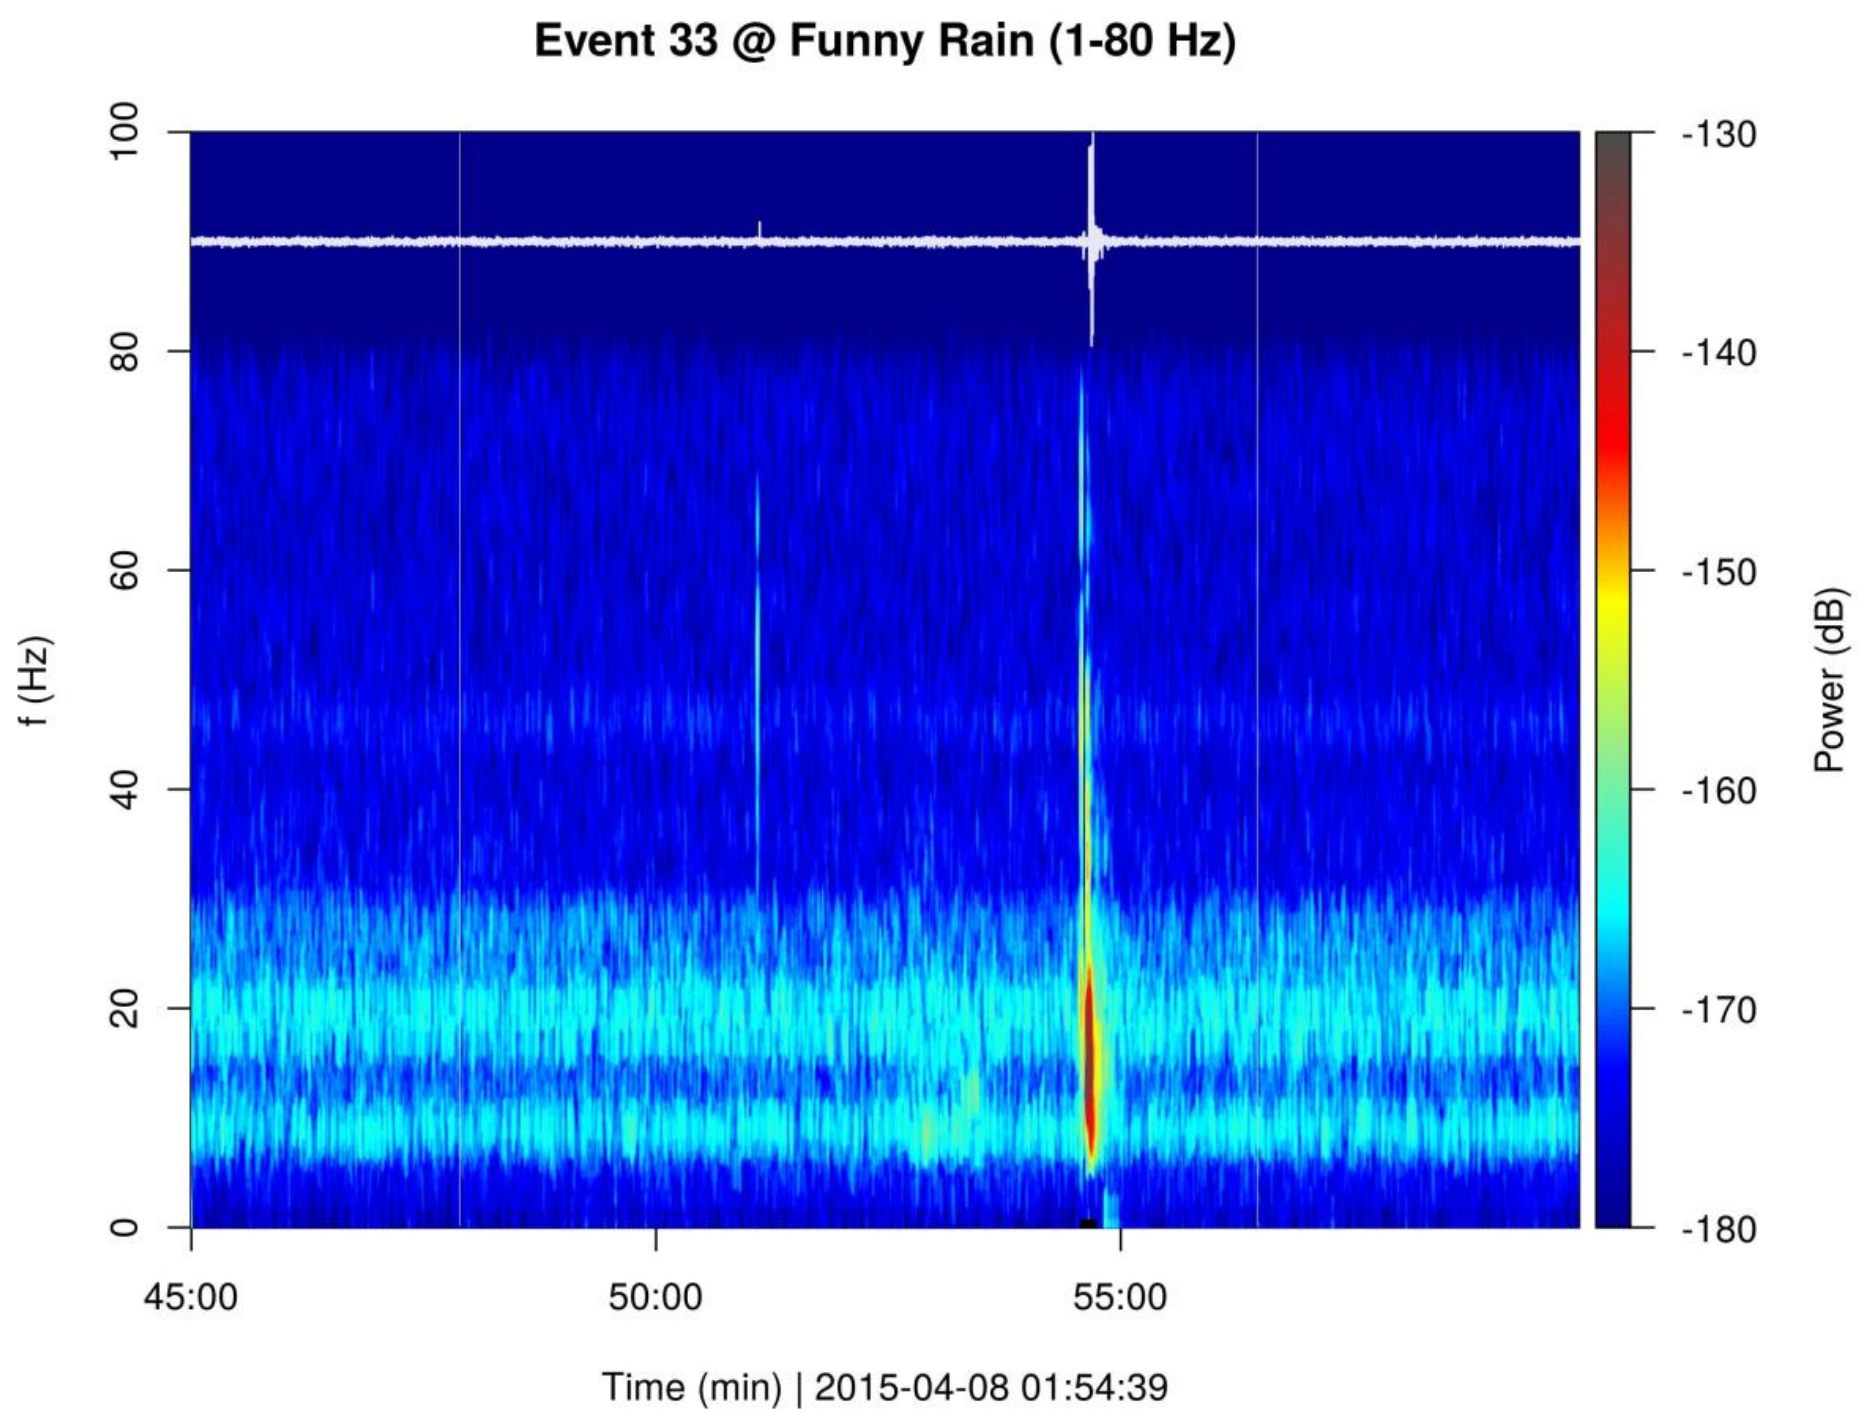

Figure 34:

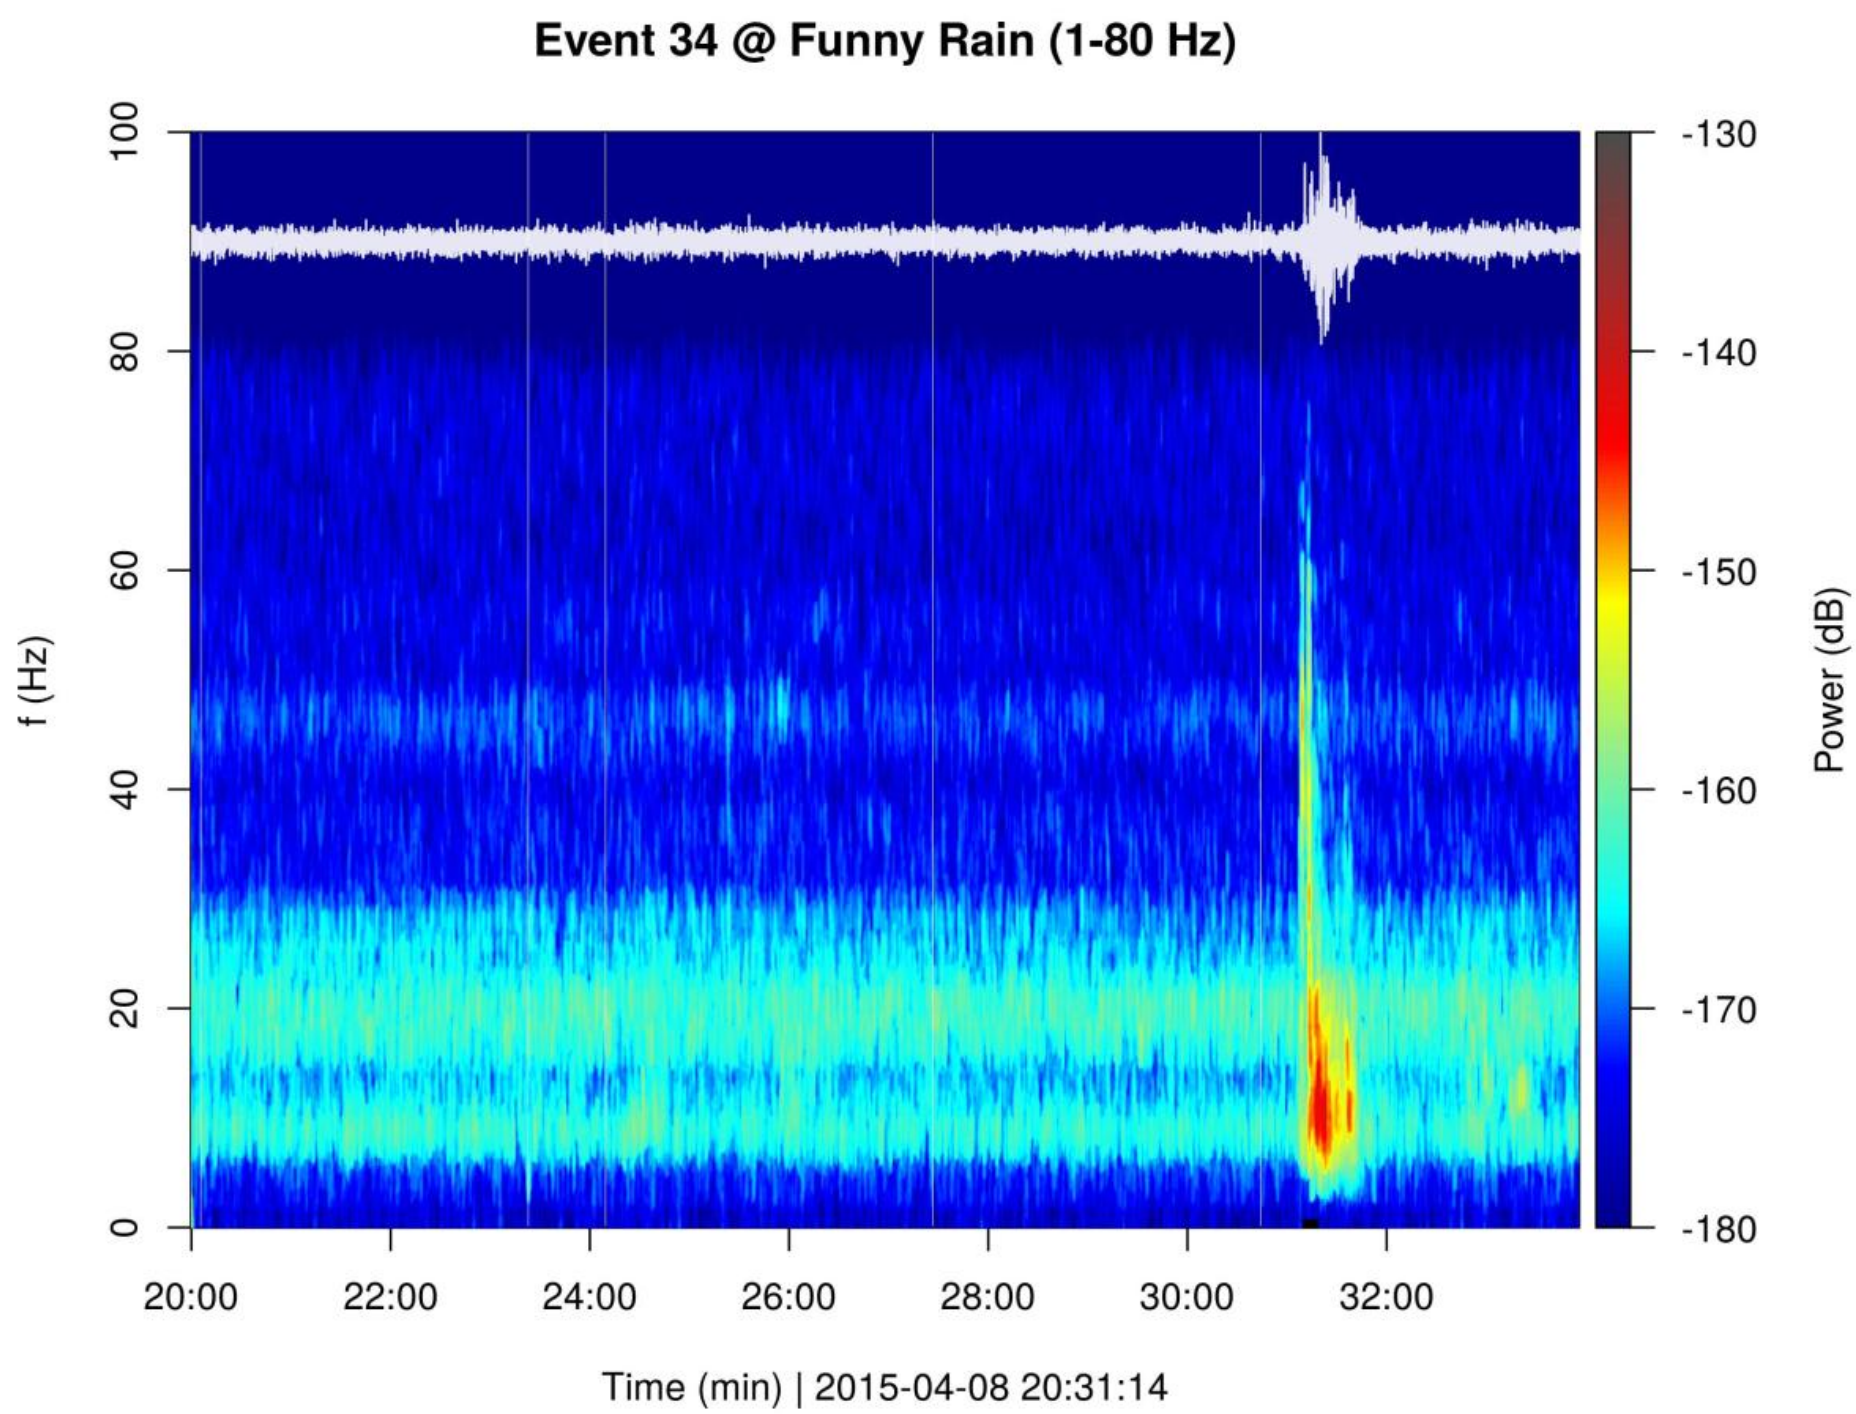

Figure 35:



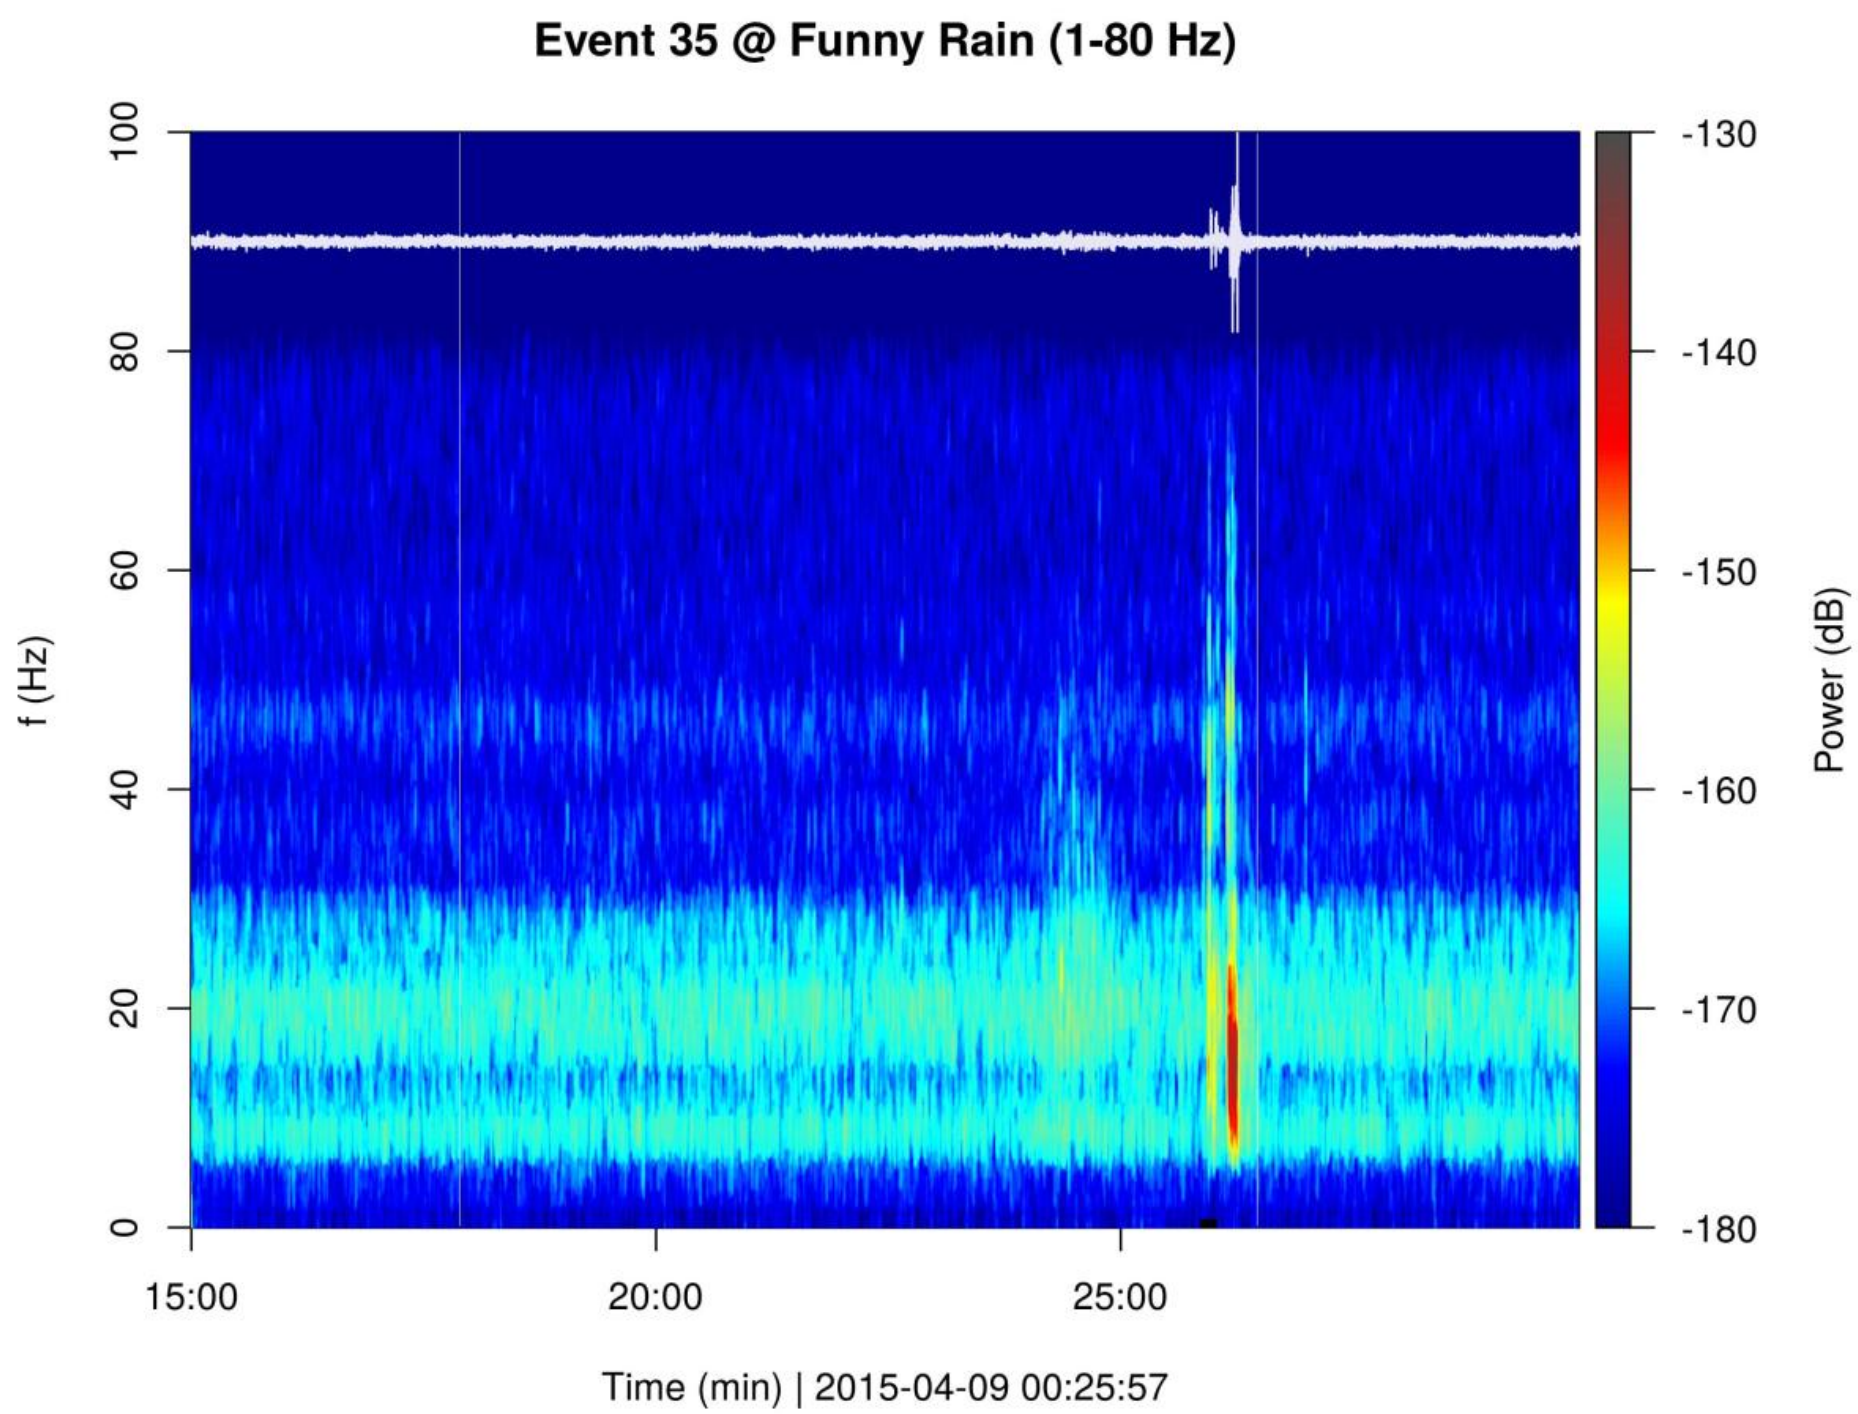

Figure 36:

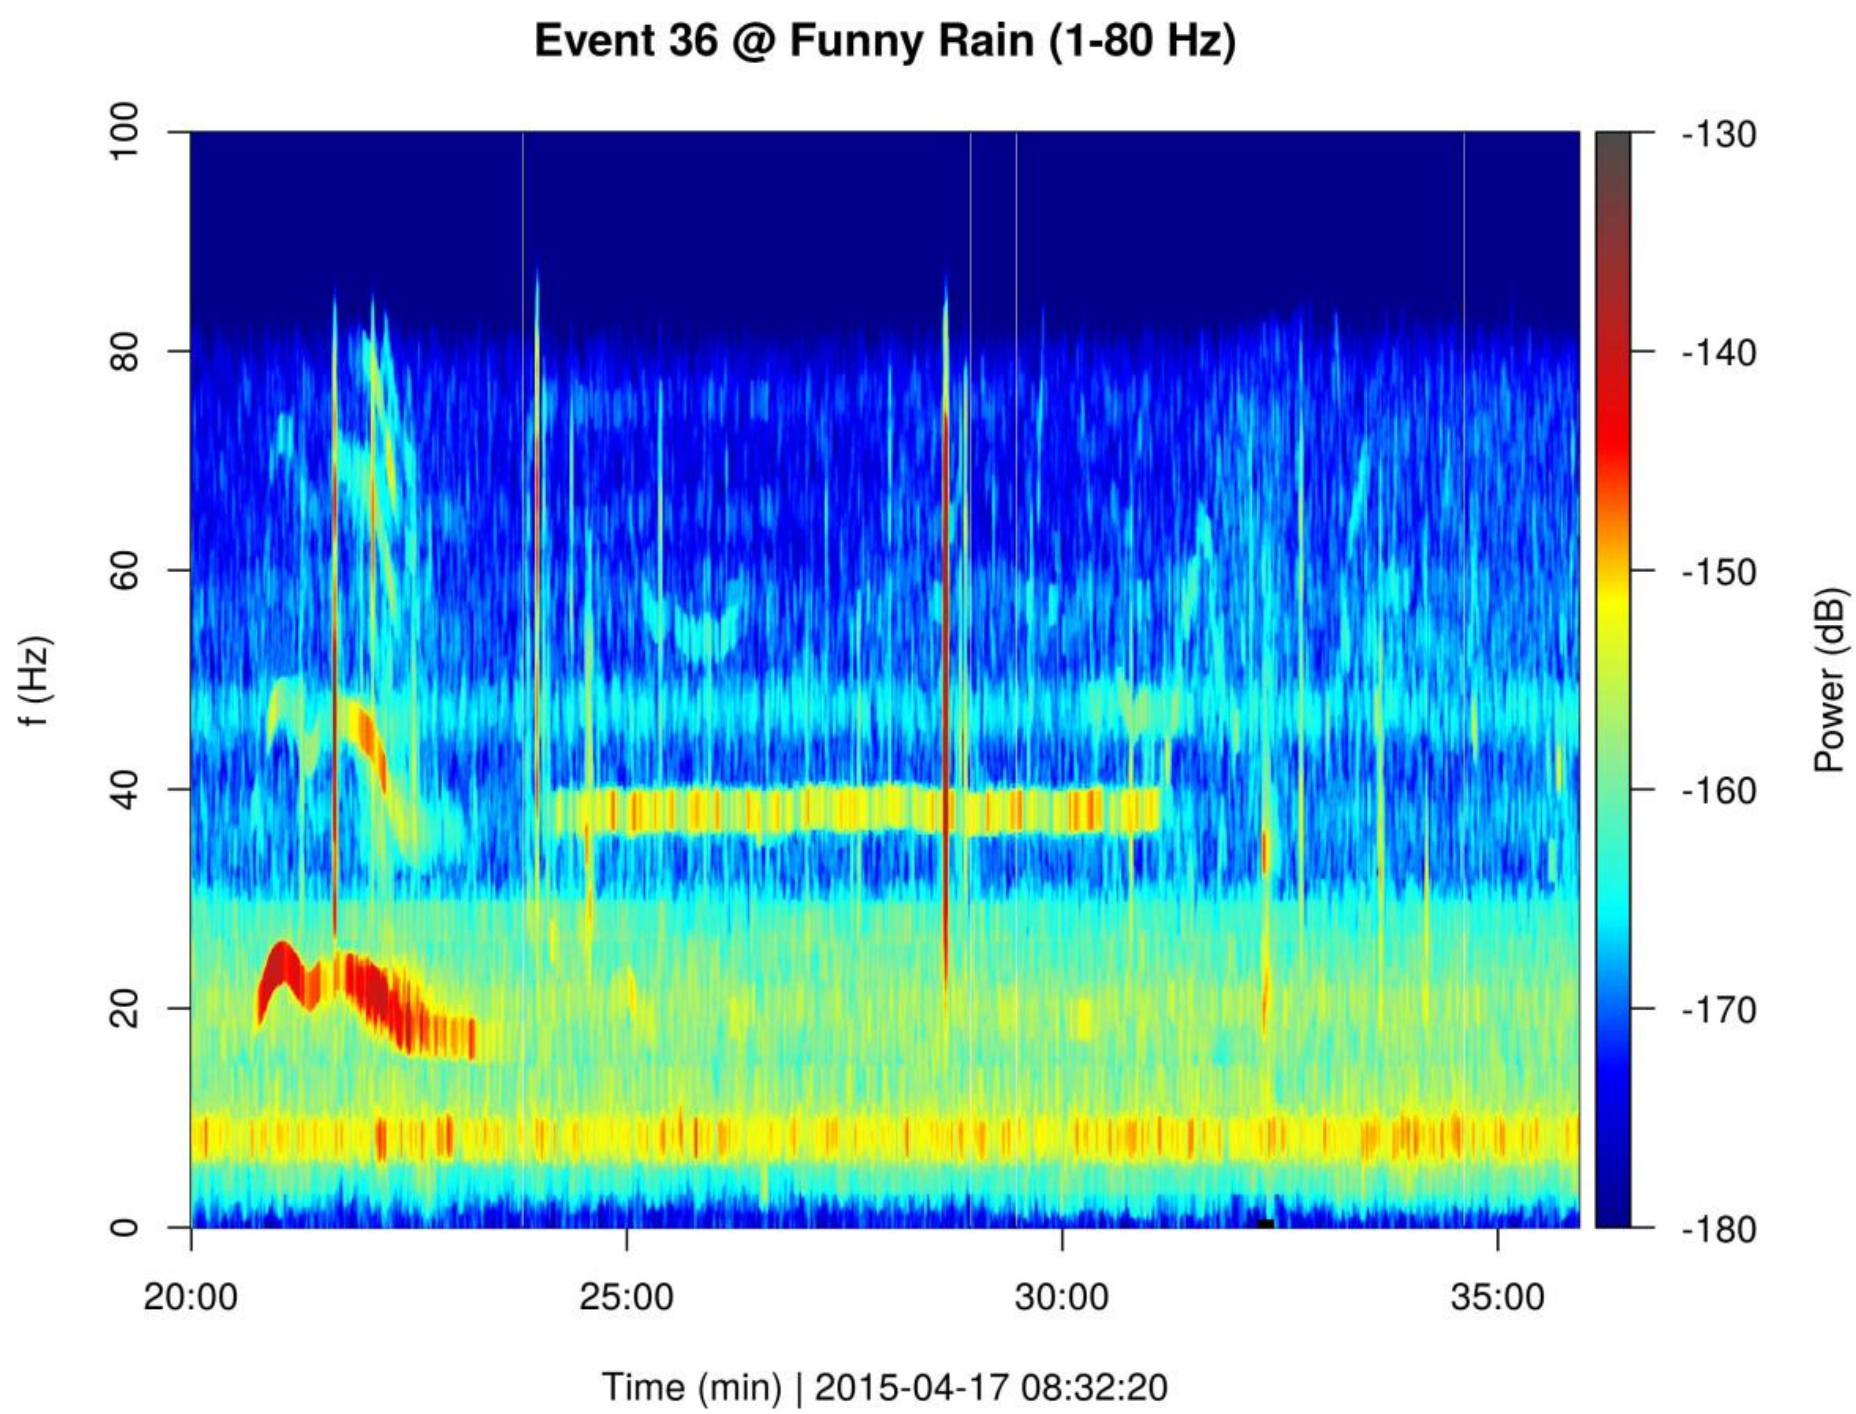

Figure 37:



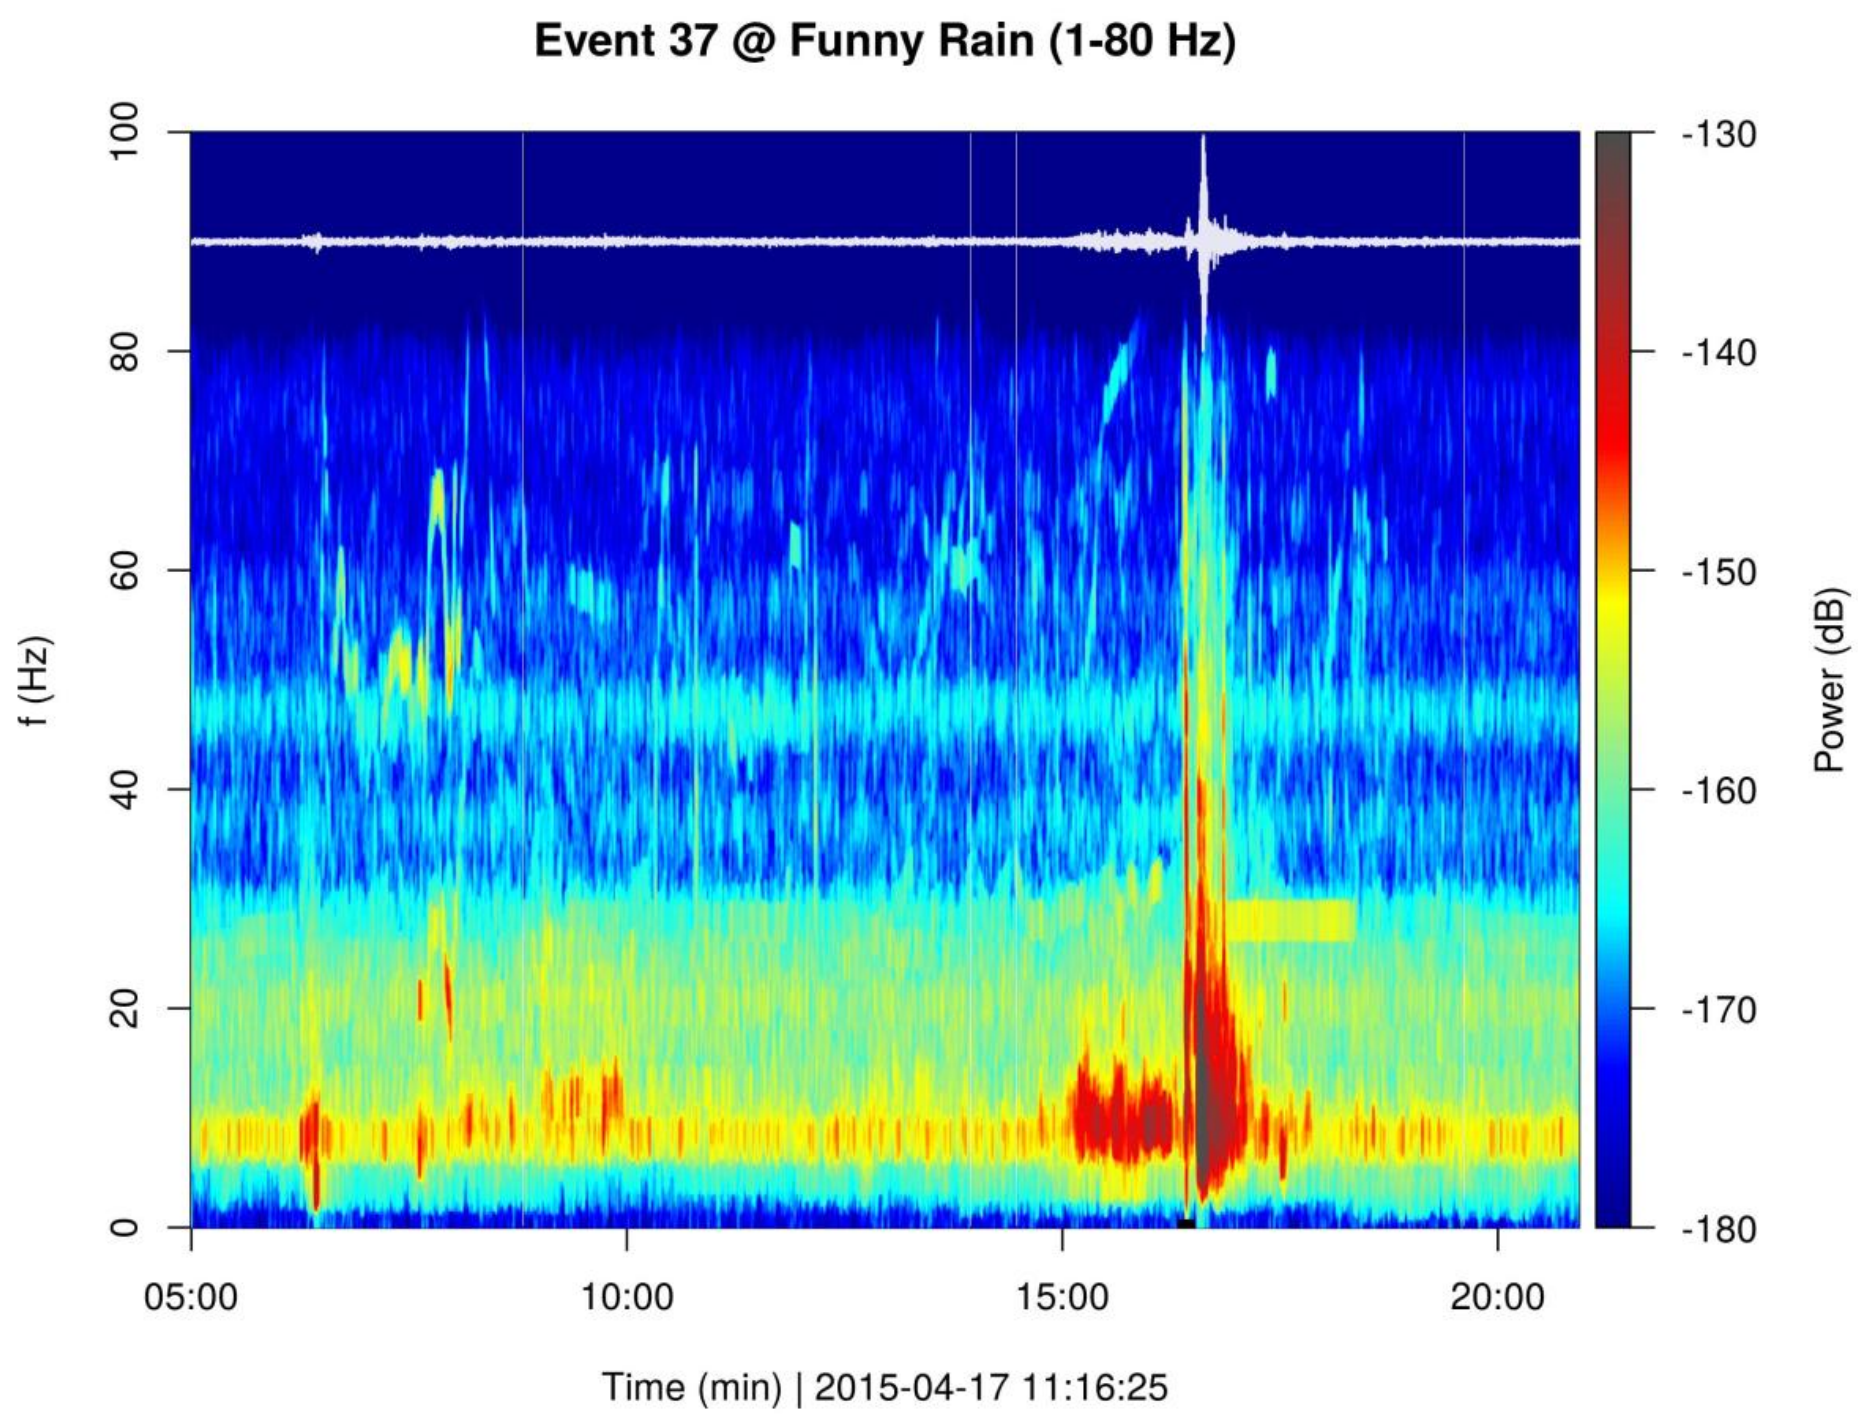

Figure 38:

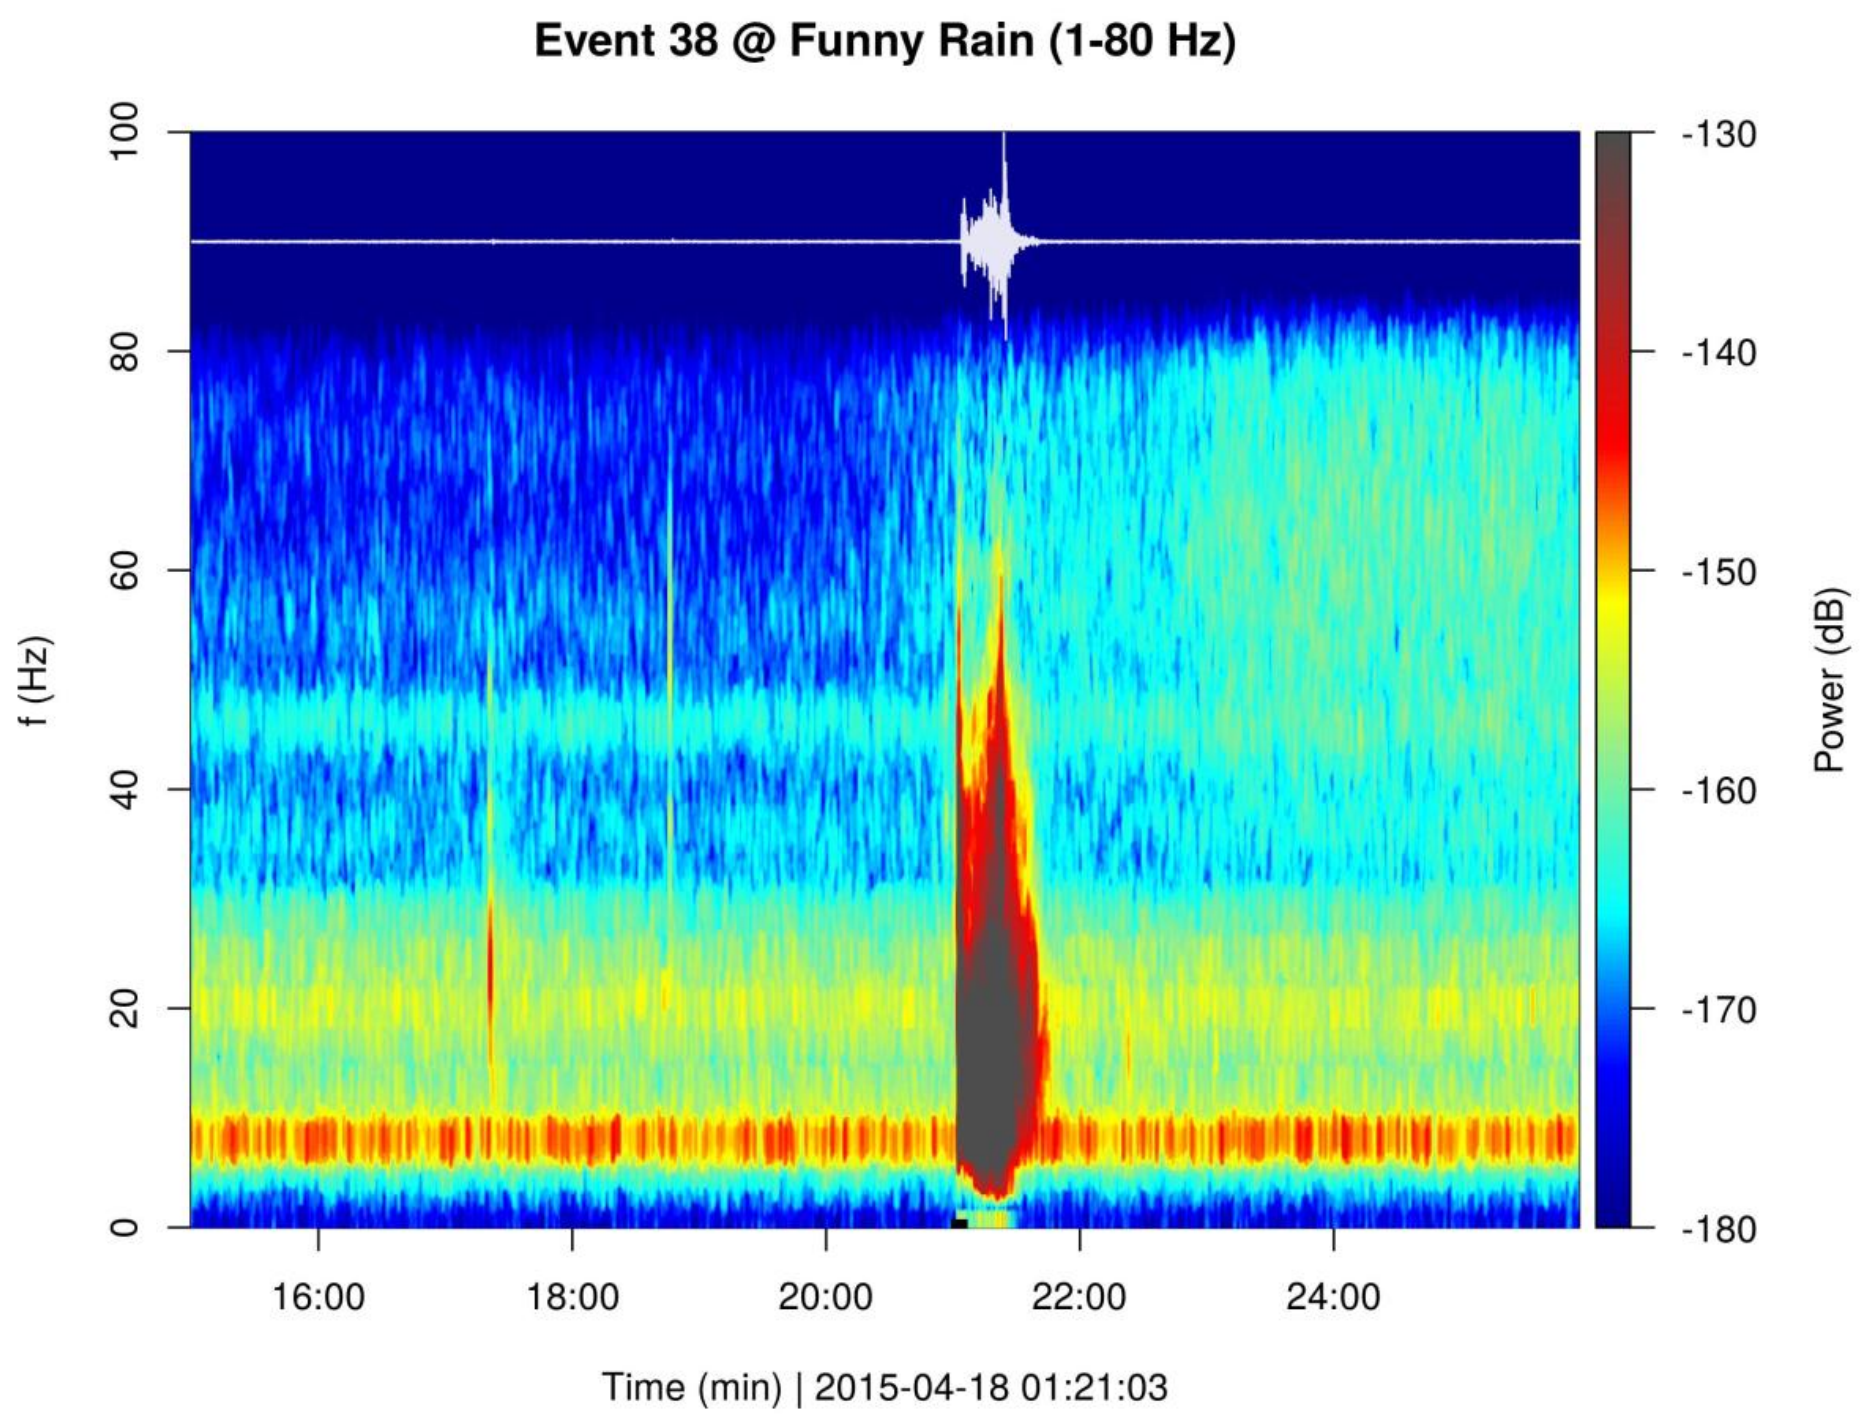

Figure 39:



Event 39 @ Funny Rain (1-80 Hz)

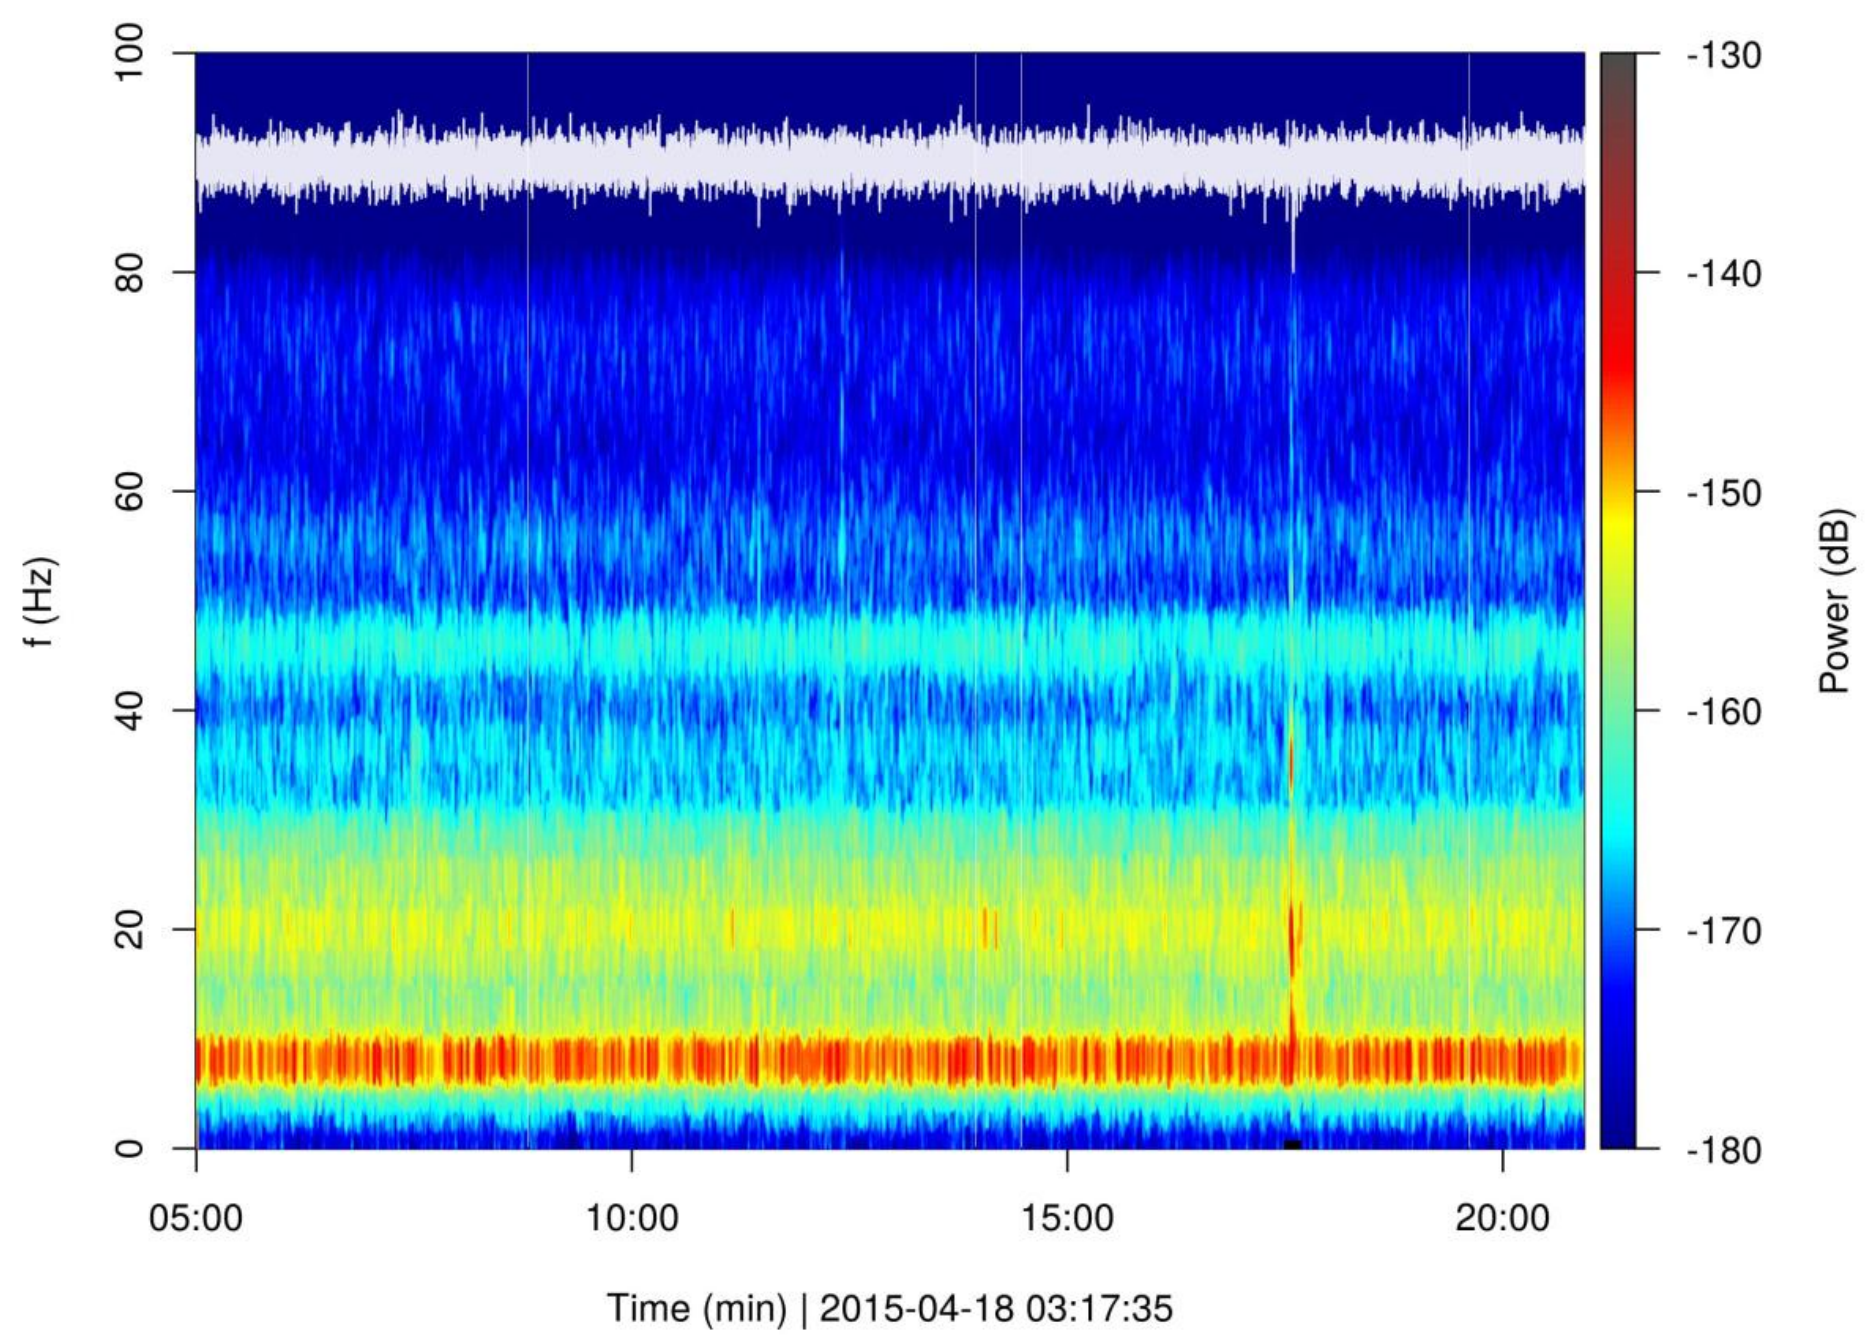

Figure 40:

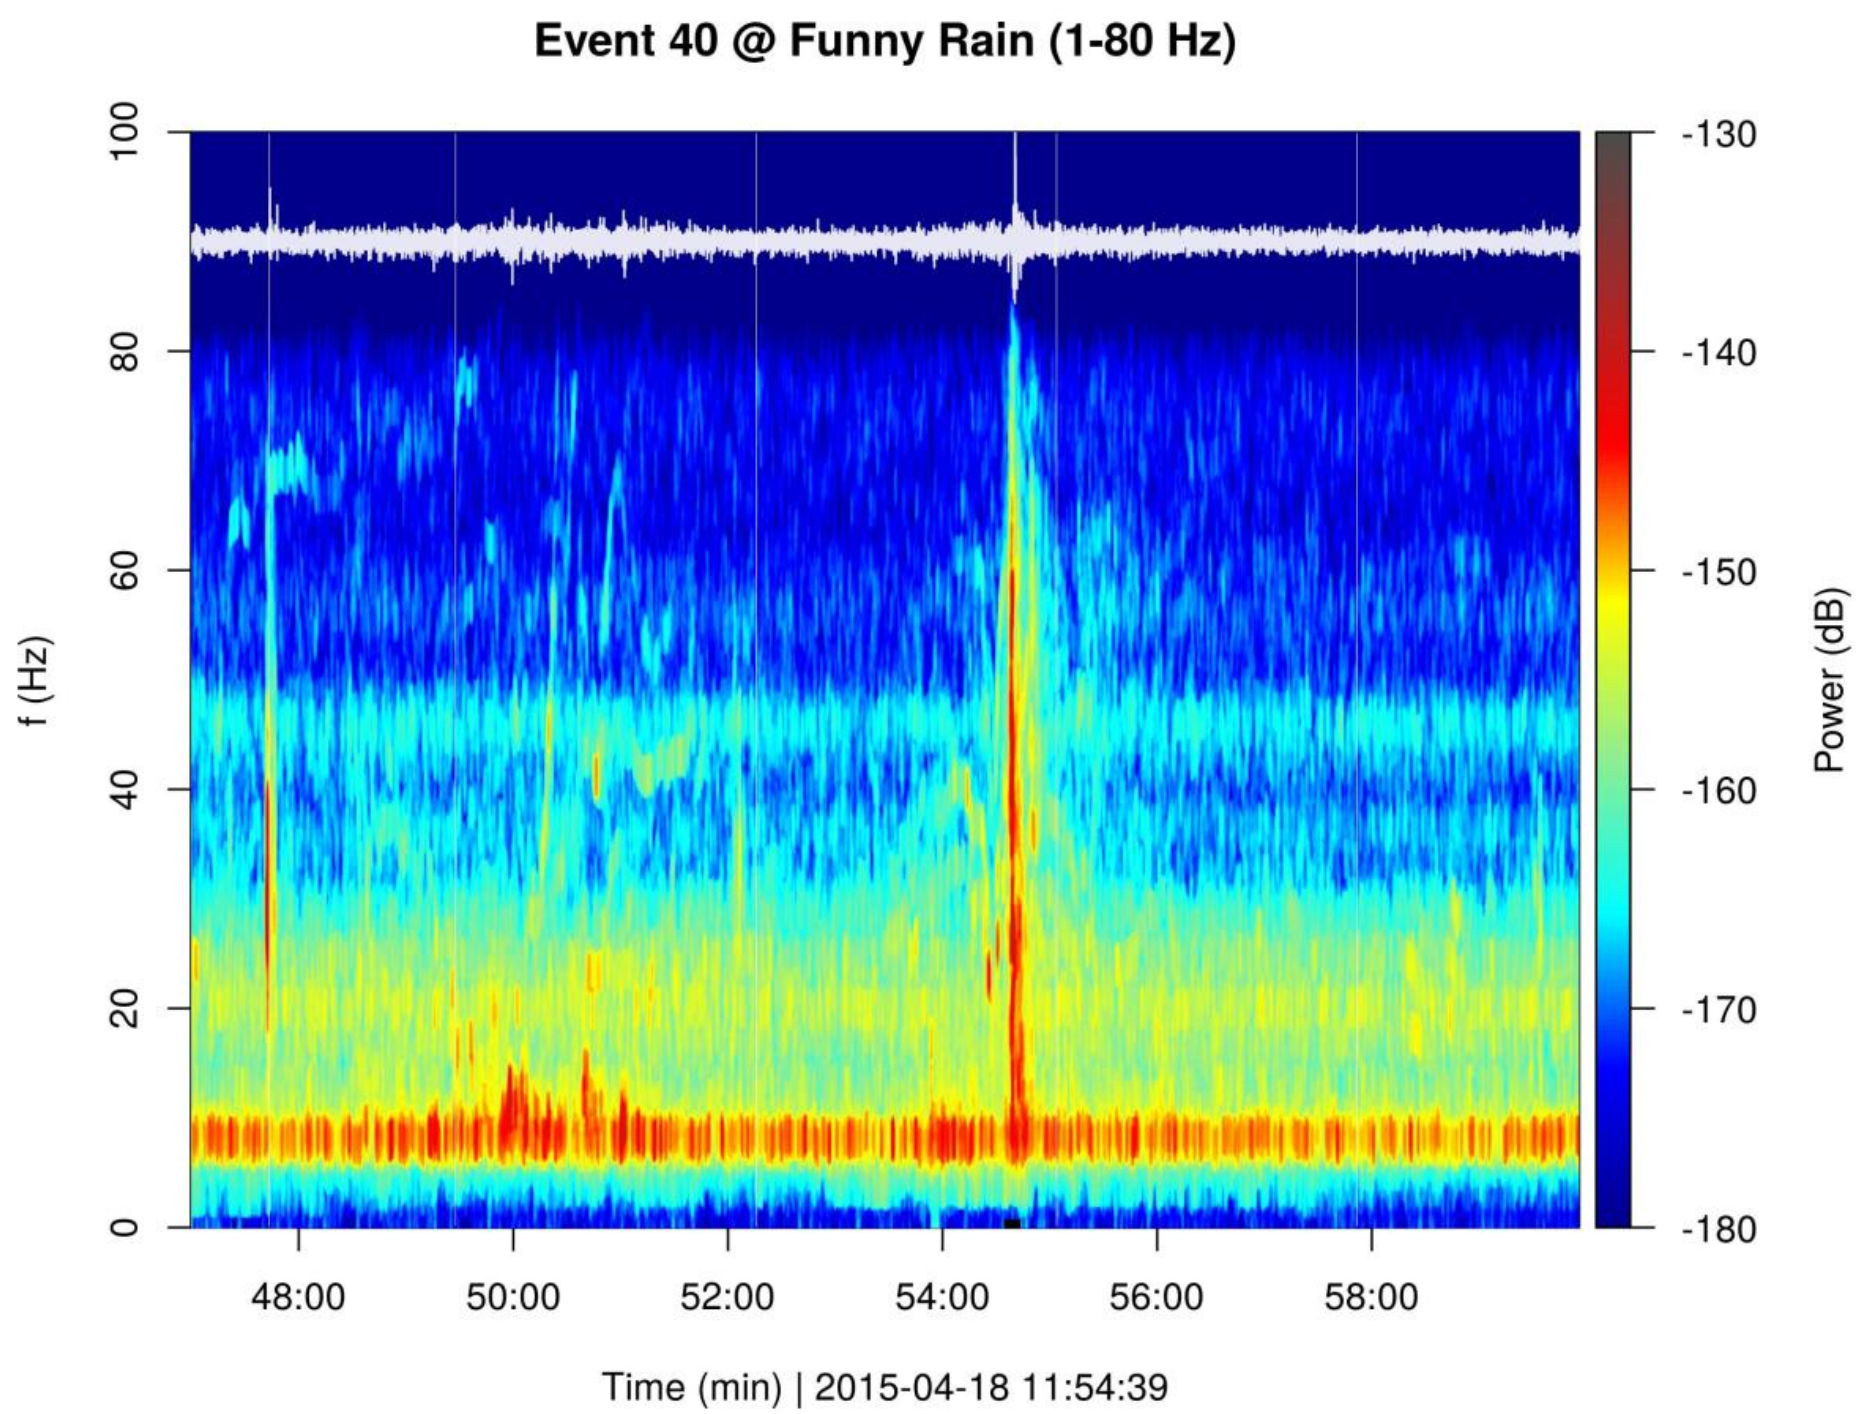

Figure 41:



Event 41 @ Funny Rain (1-80 Hz)

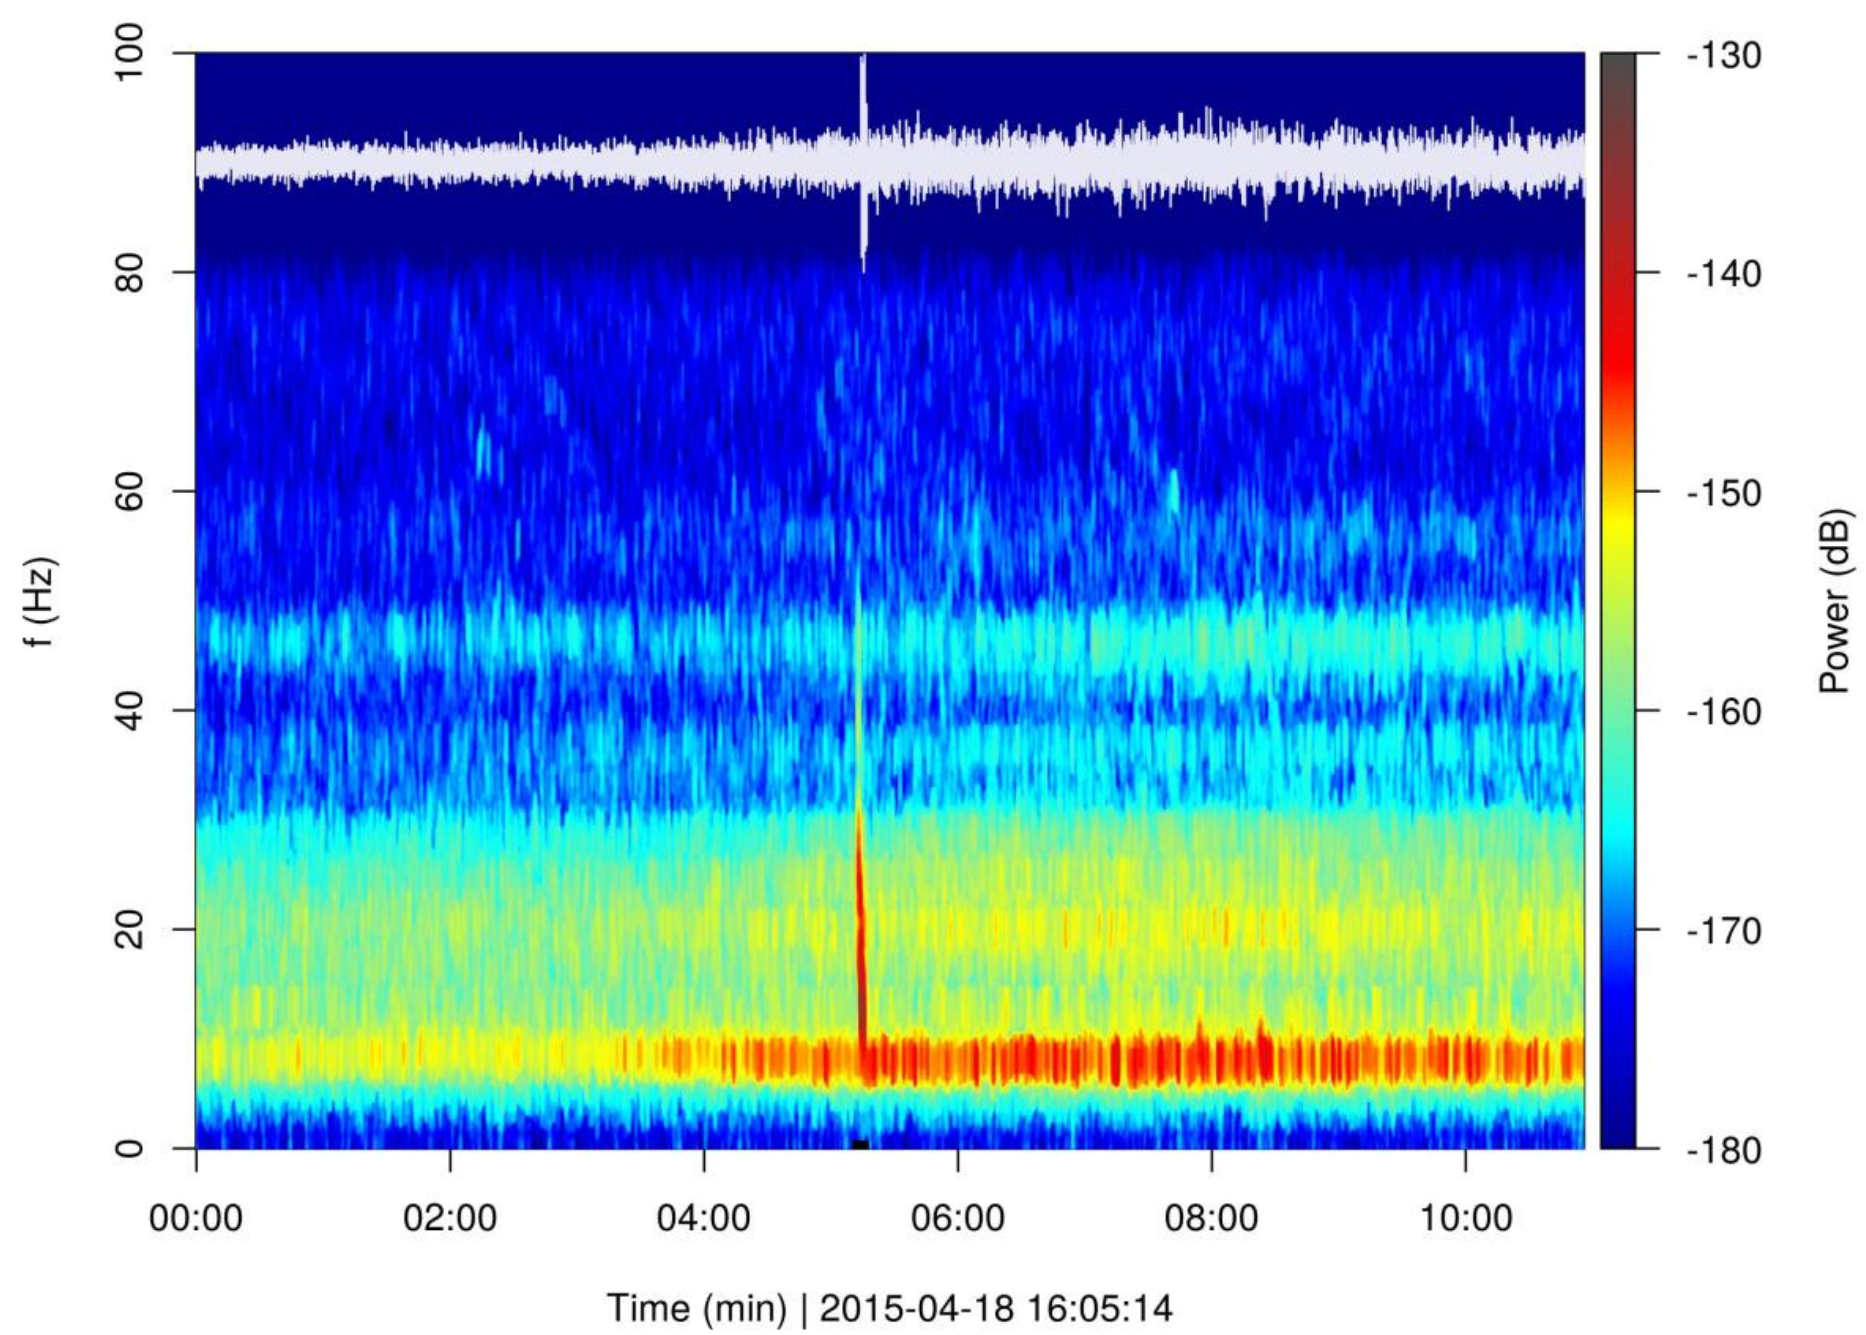

Figure 42:

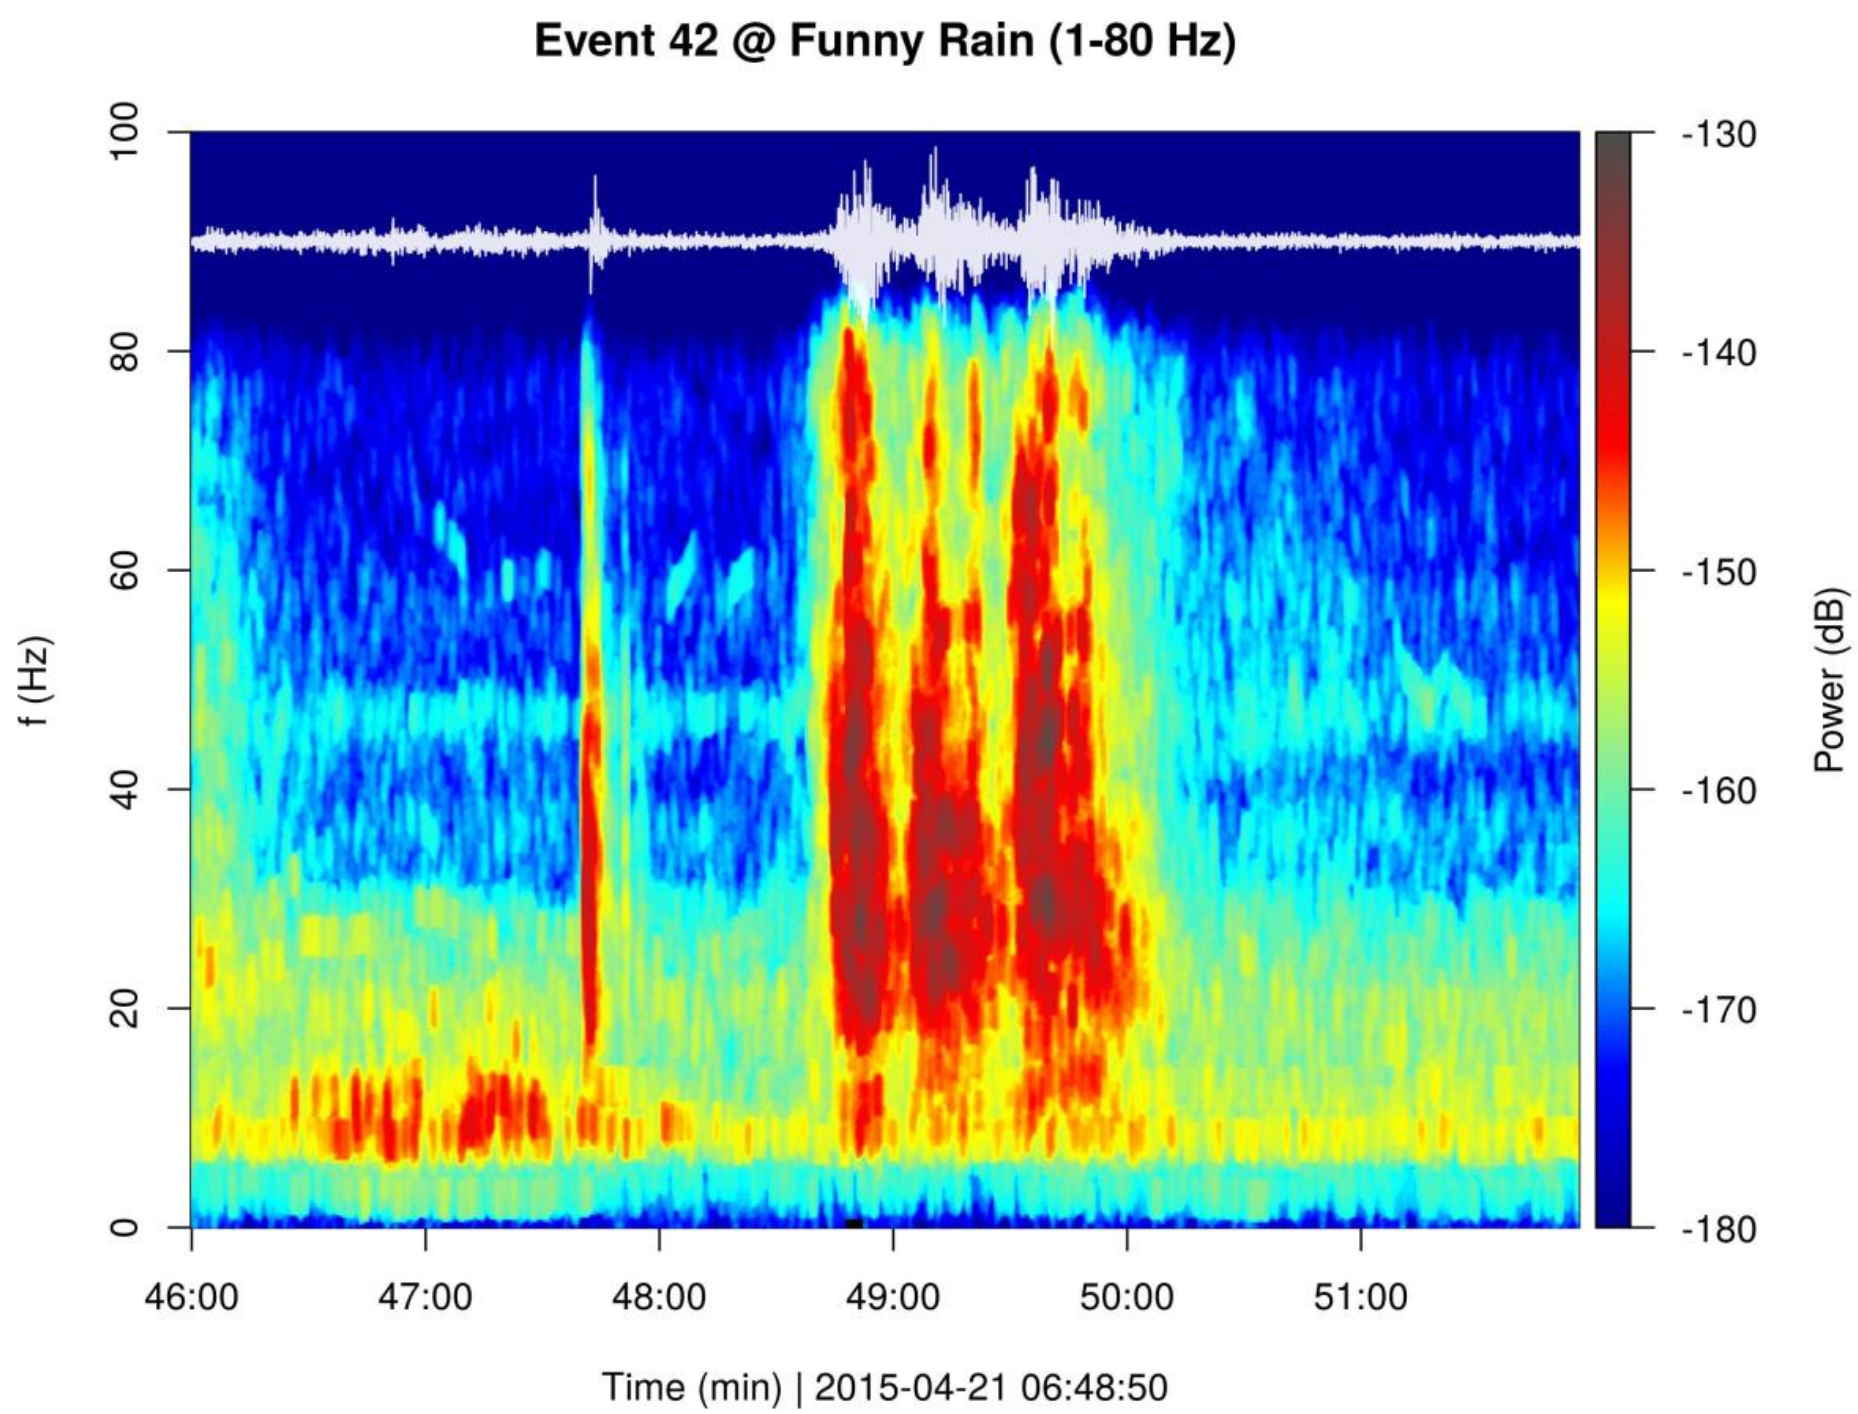

Figure 43:



Event 43 @ Funny Rain (1-80 Hz)

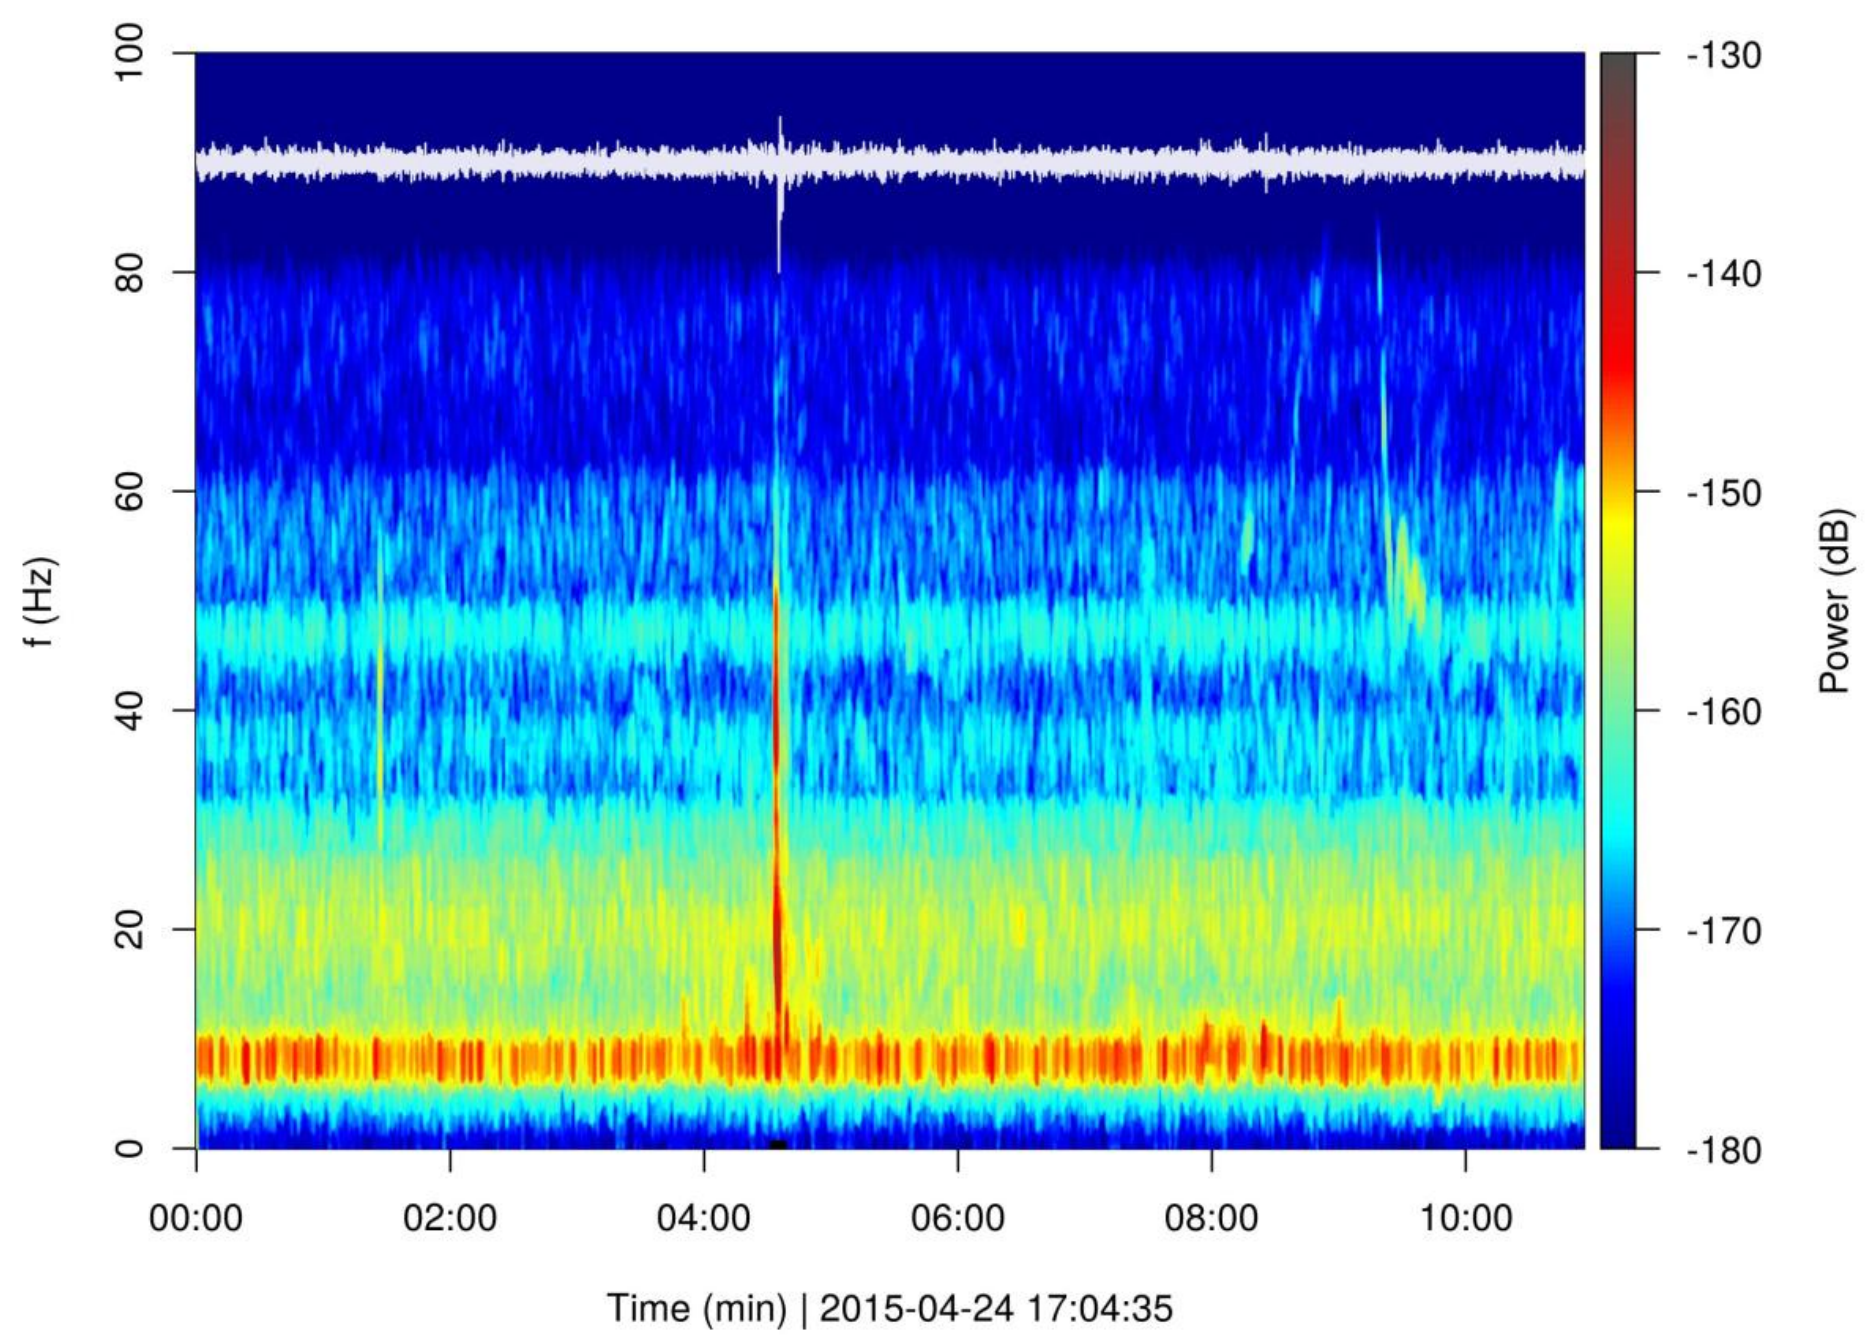

Figure 44:

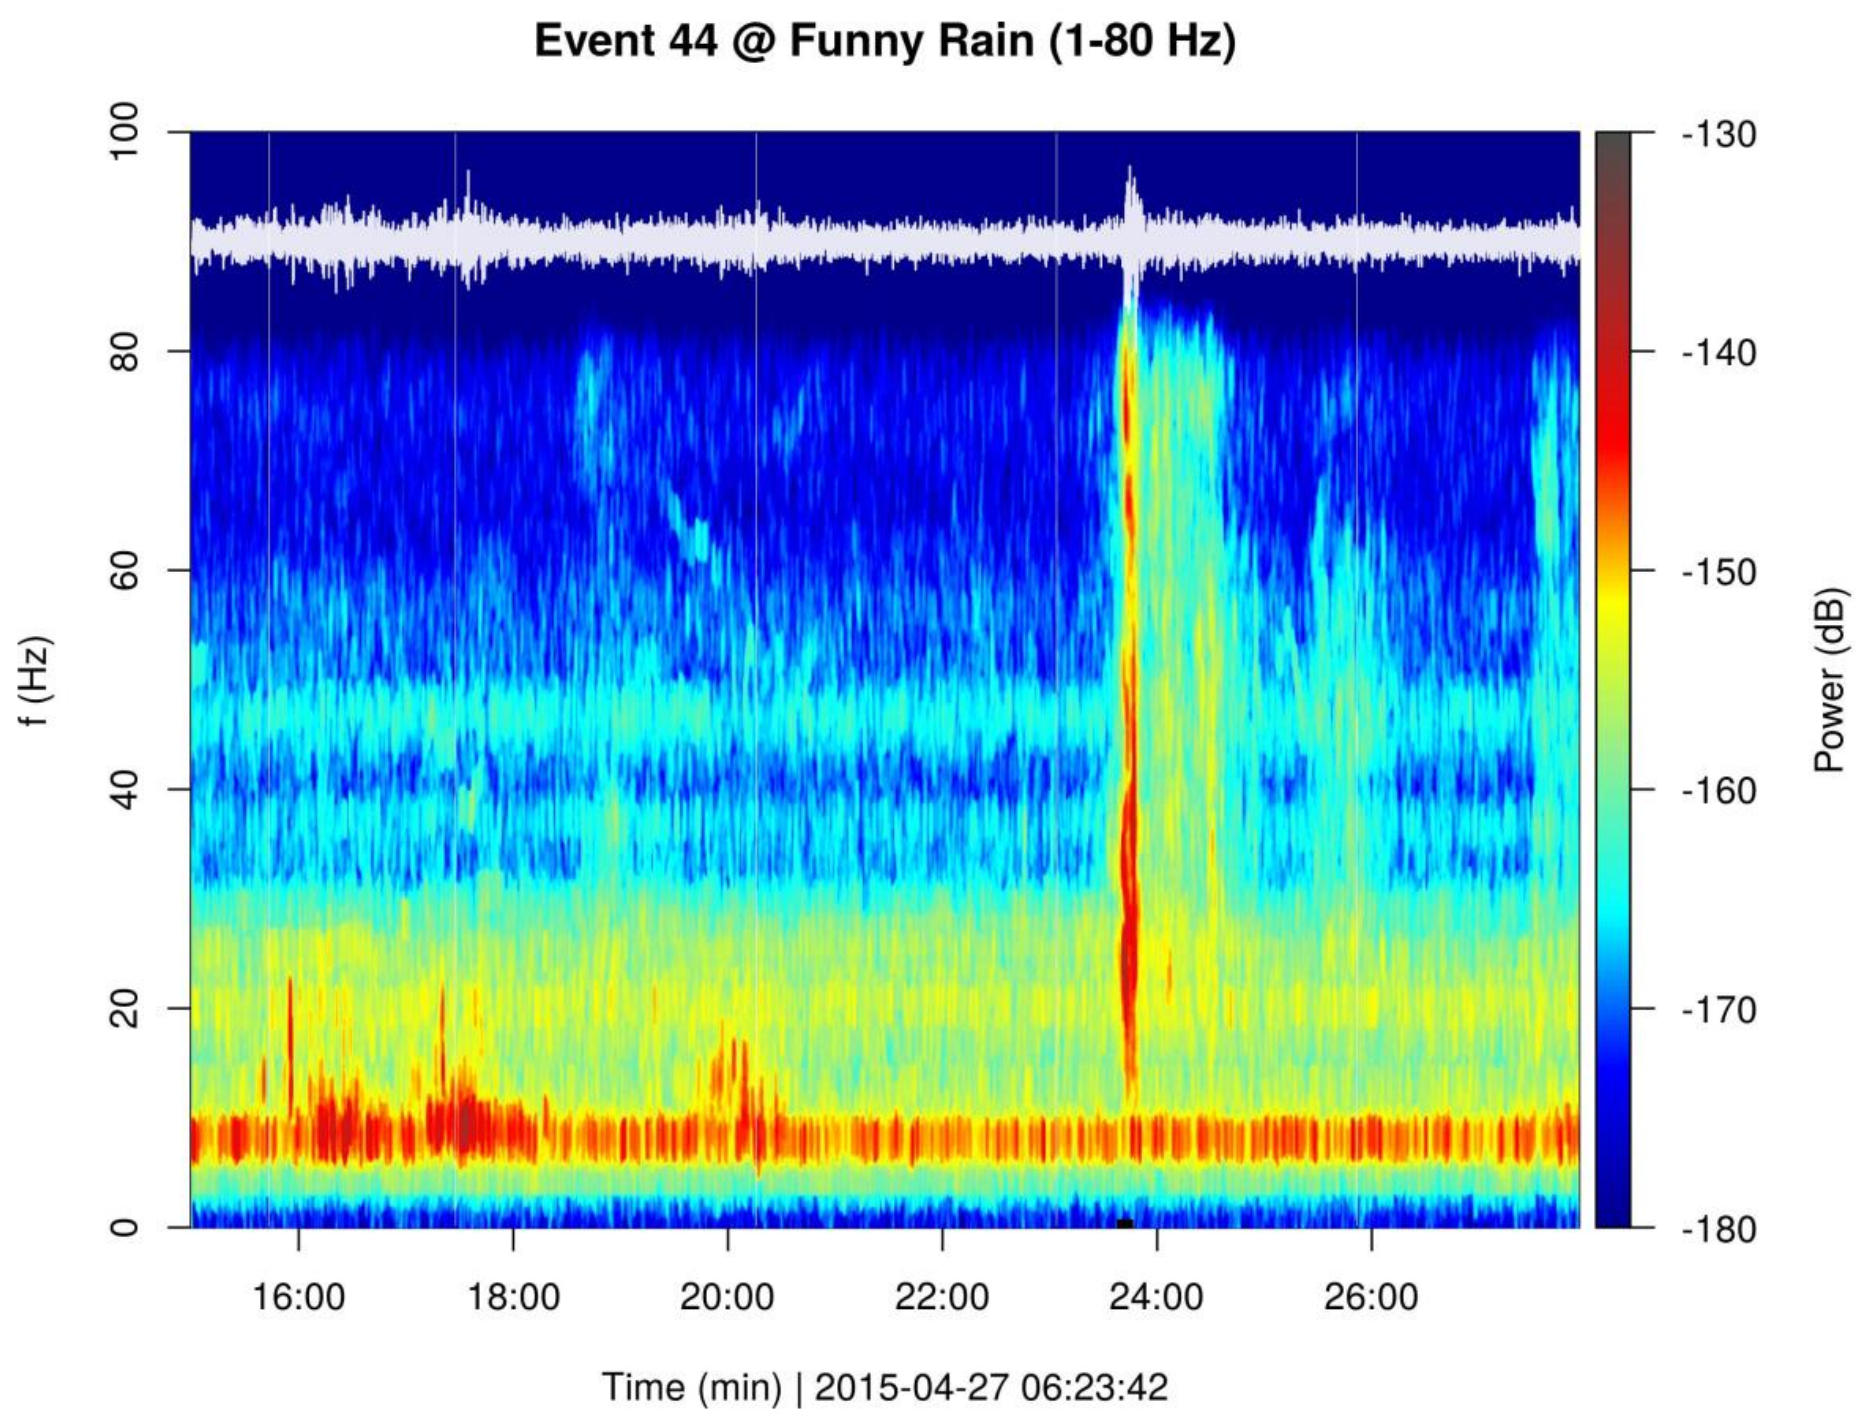

Figure 45:



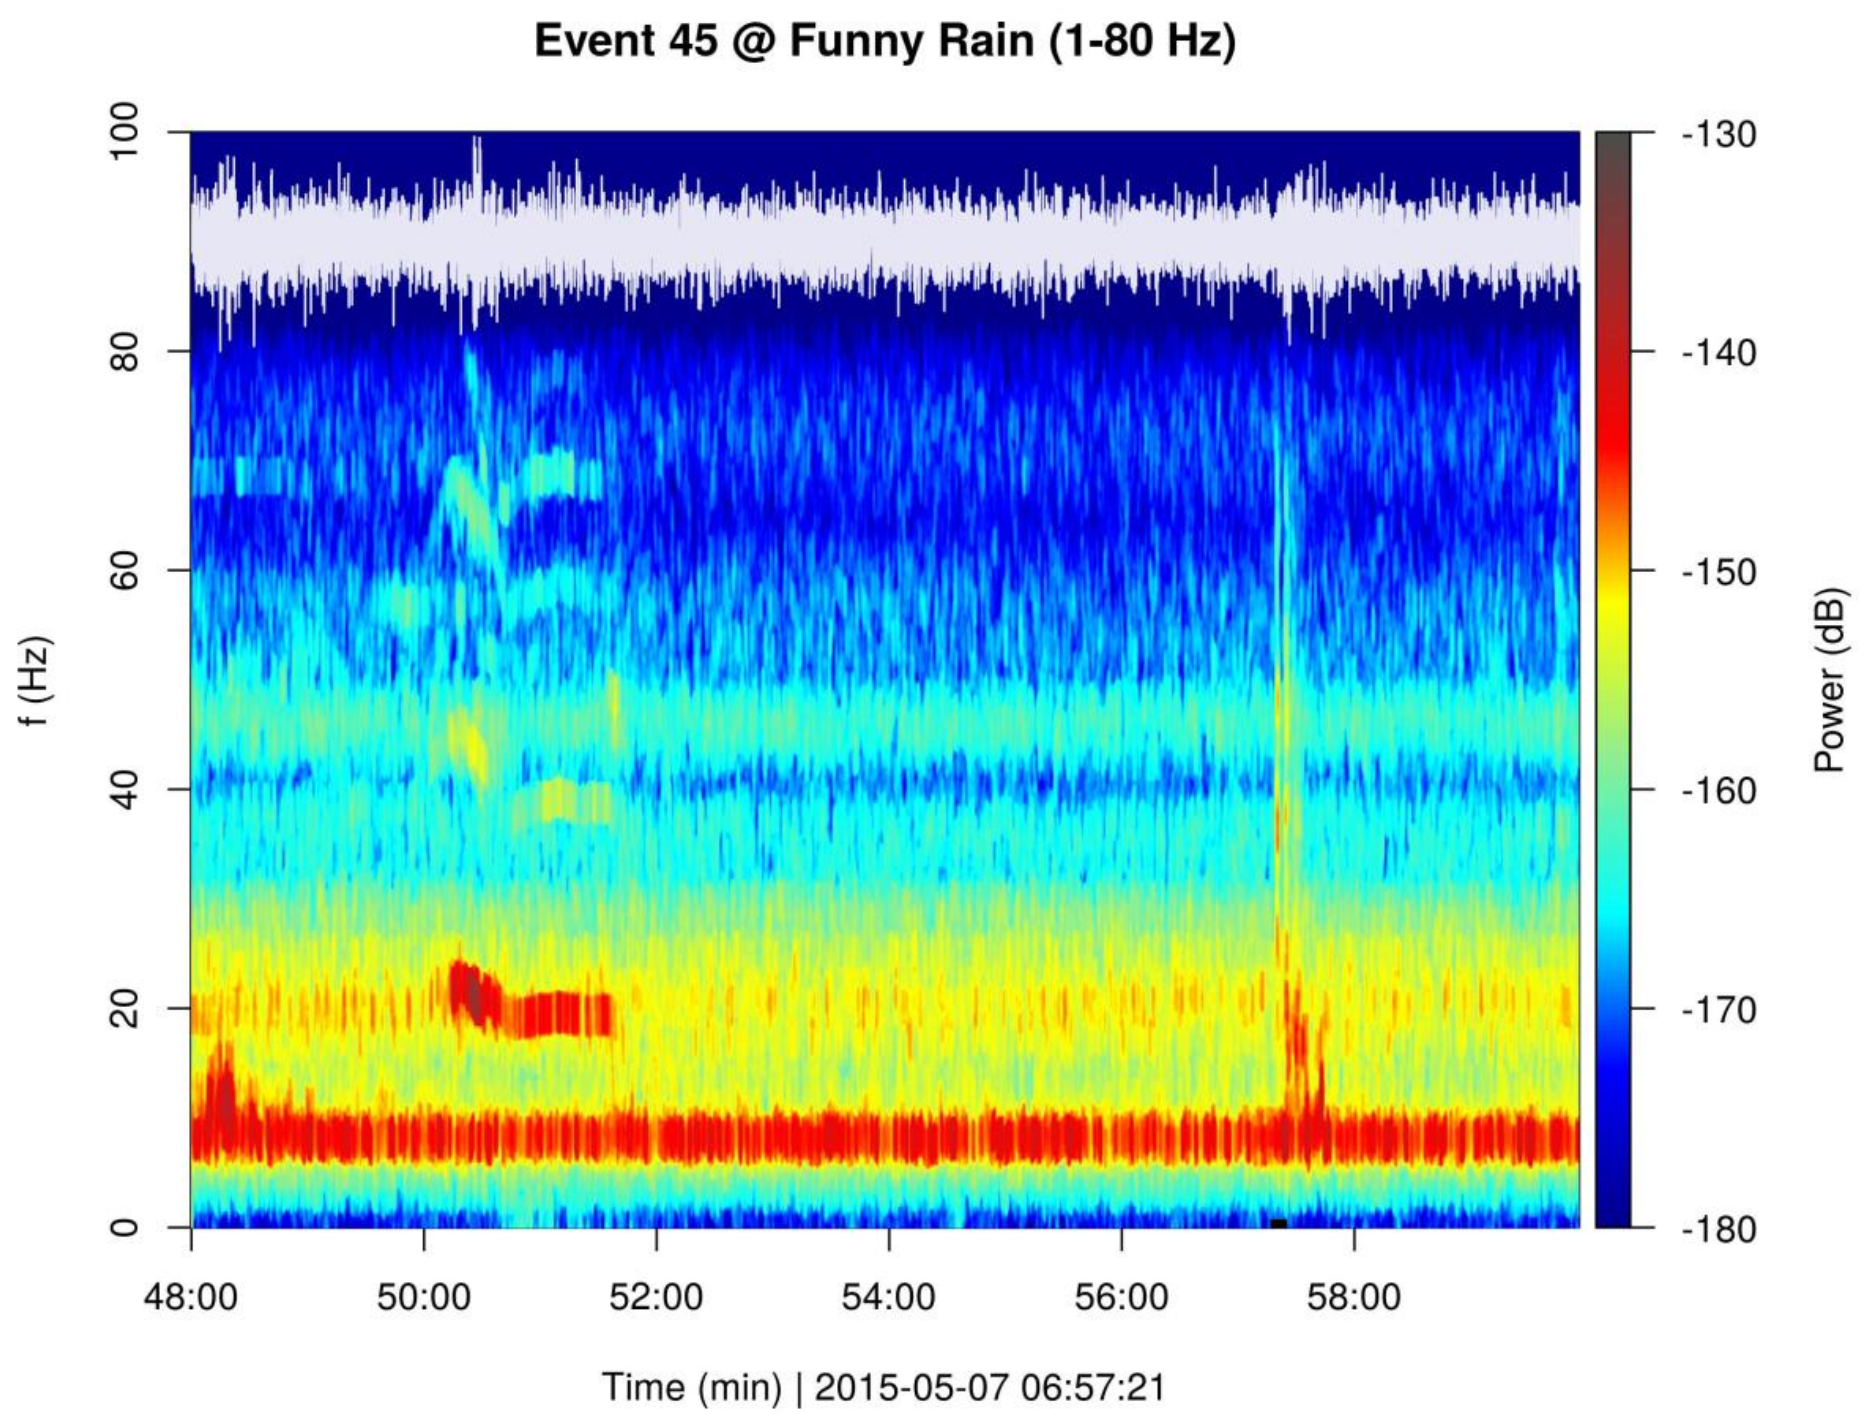

Figure 46:

Event 46 @ Funny Rain (1-80 Hz)

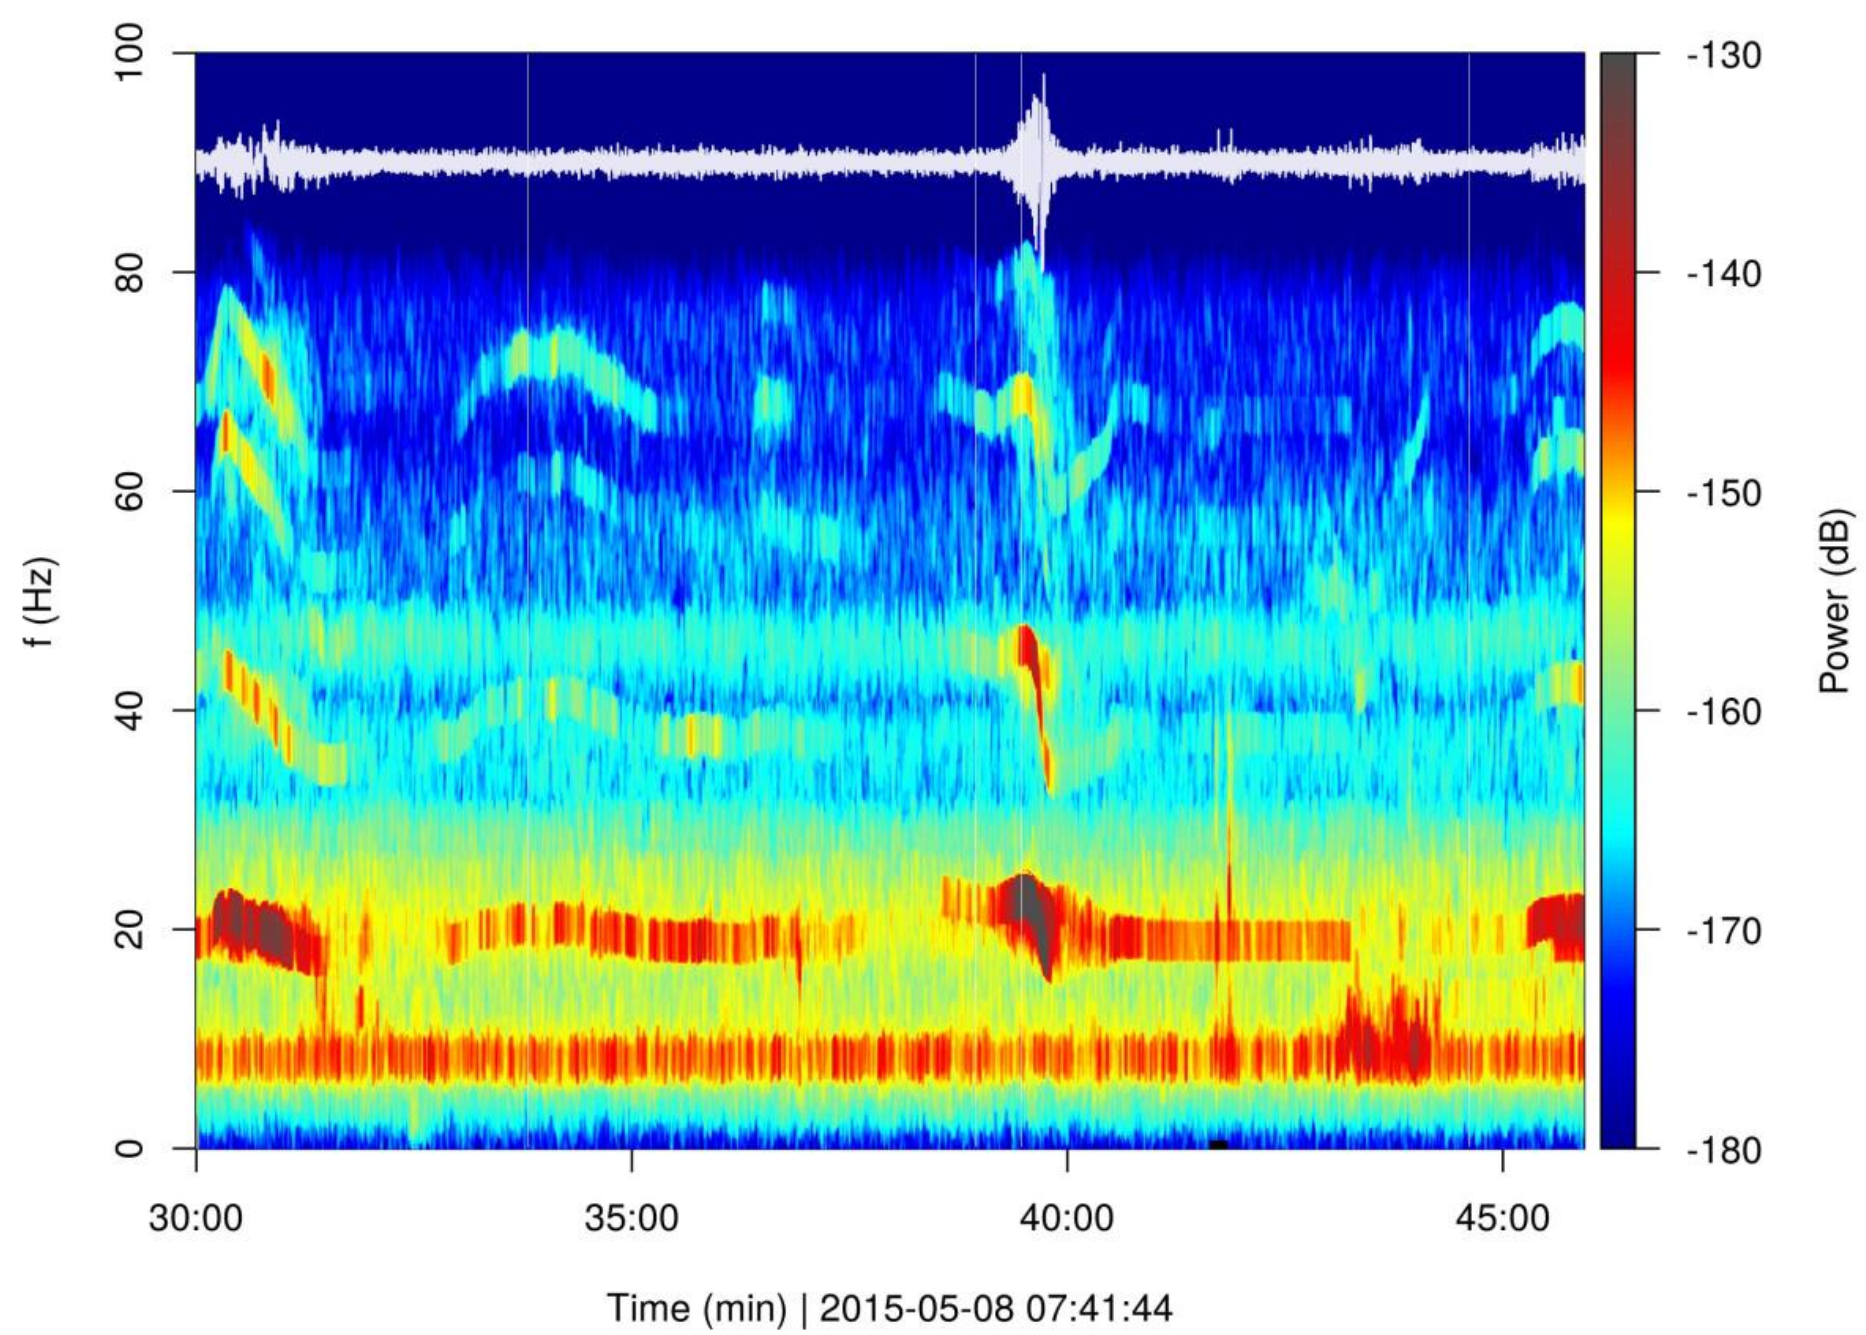

Figure 47:



Event 47 @ Funny Rain (1-80 Hz)

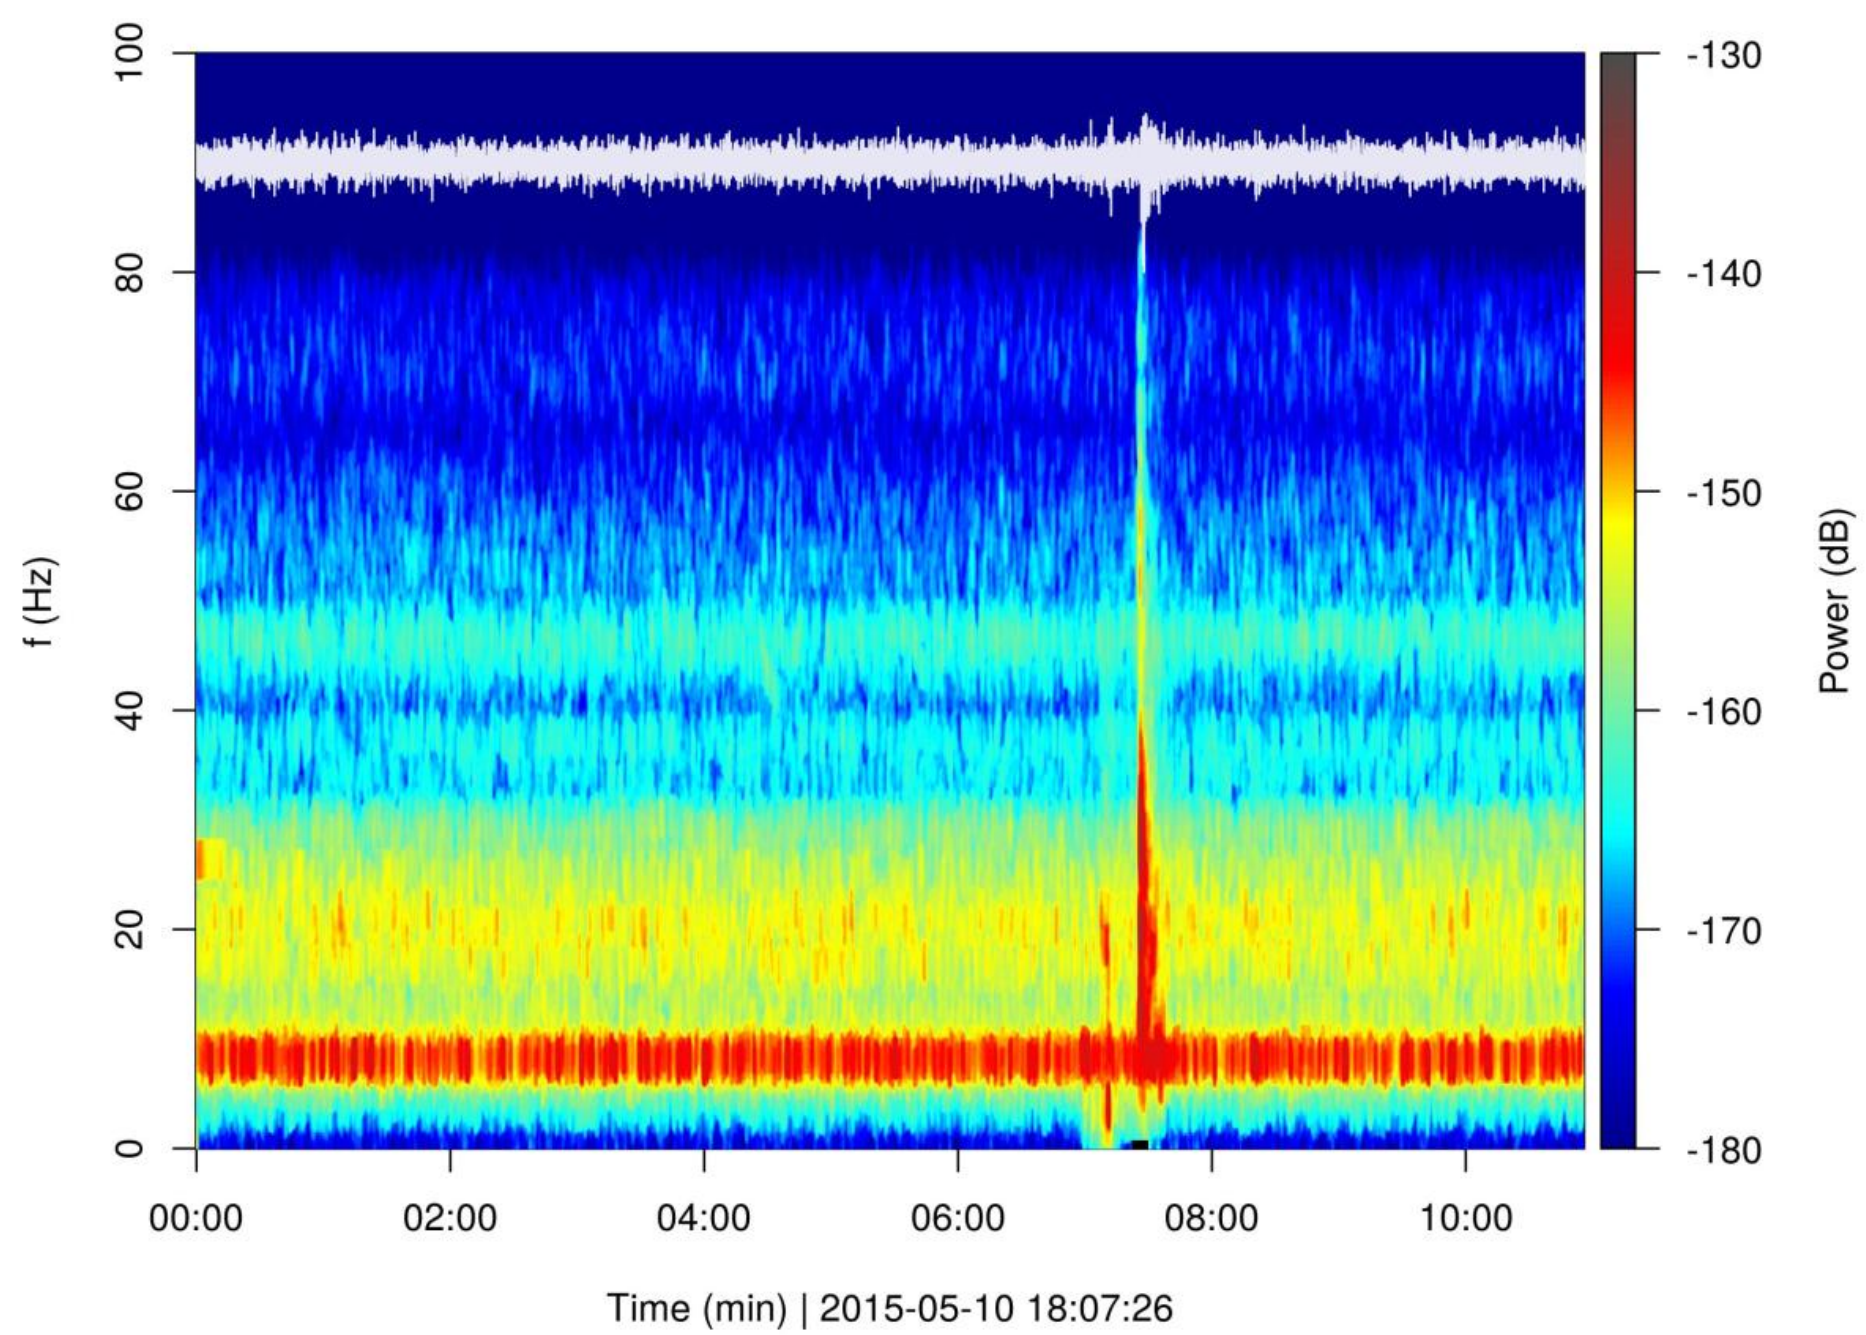

Figure 48:

Event 48 @ Funny Rain (1-80 Hz)

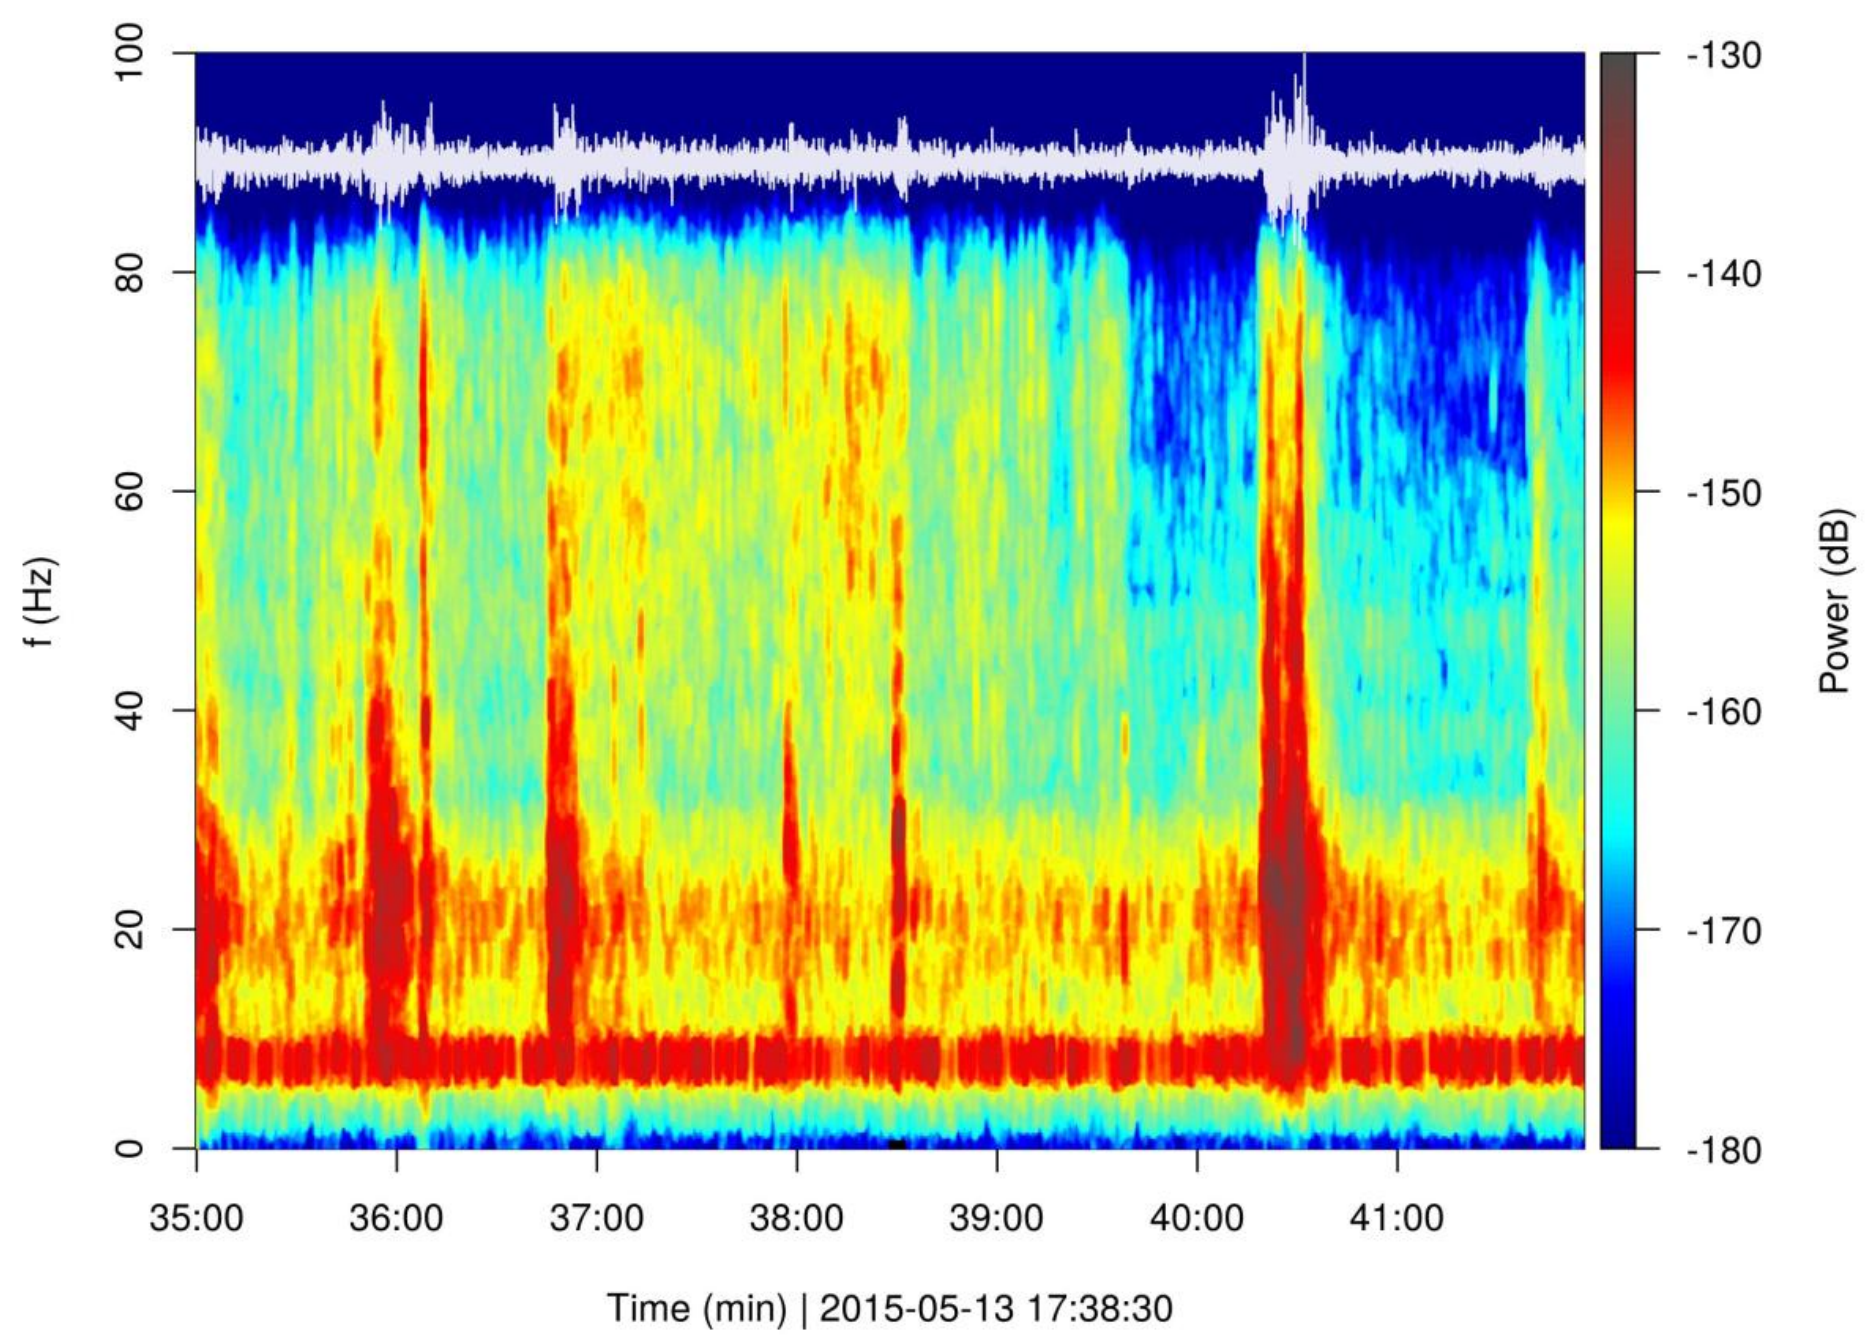

Figure 49:



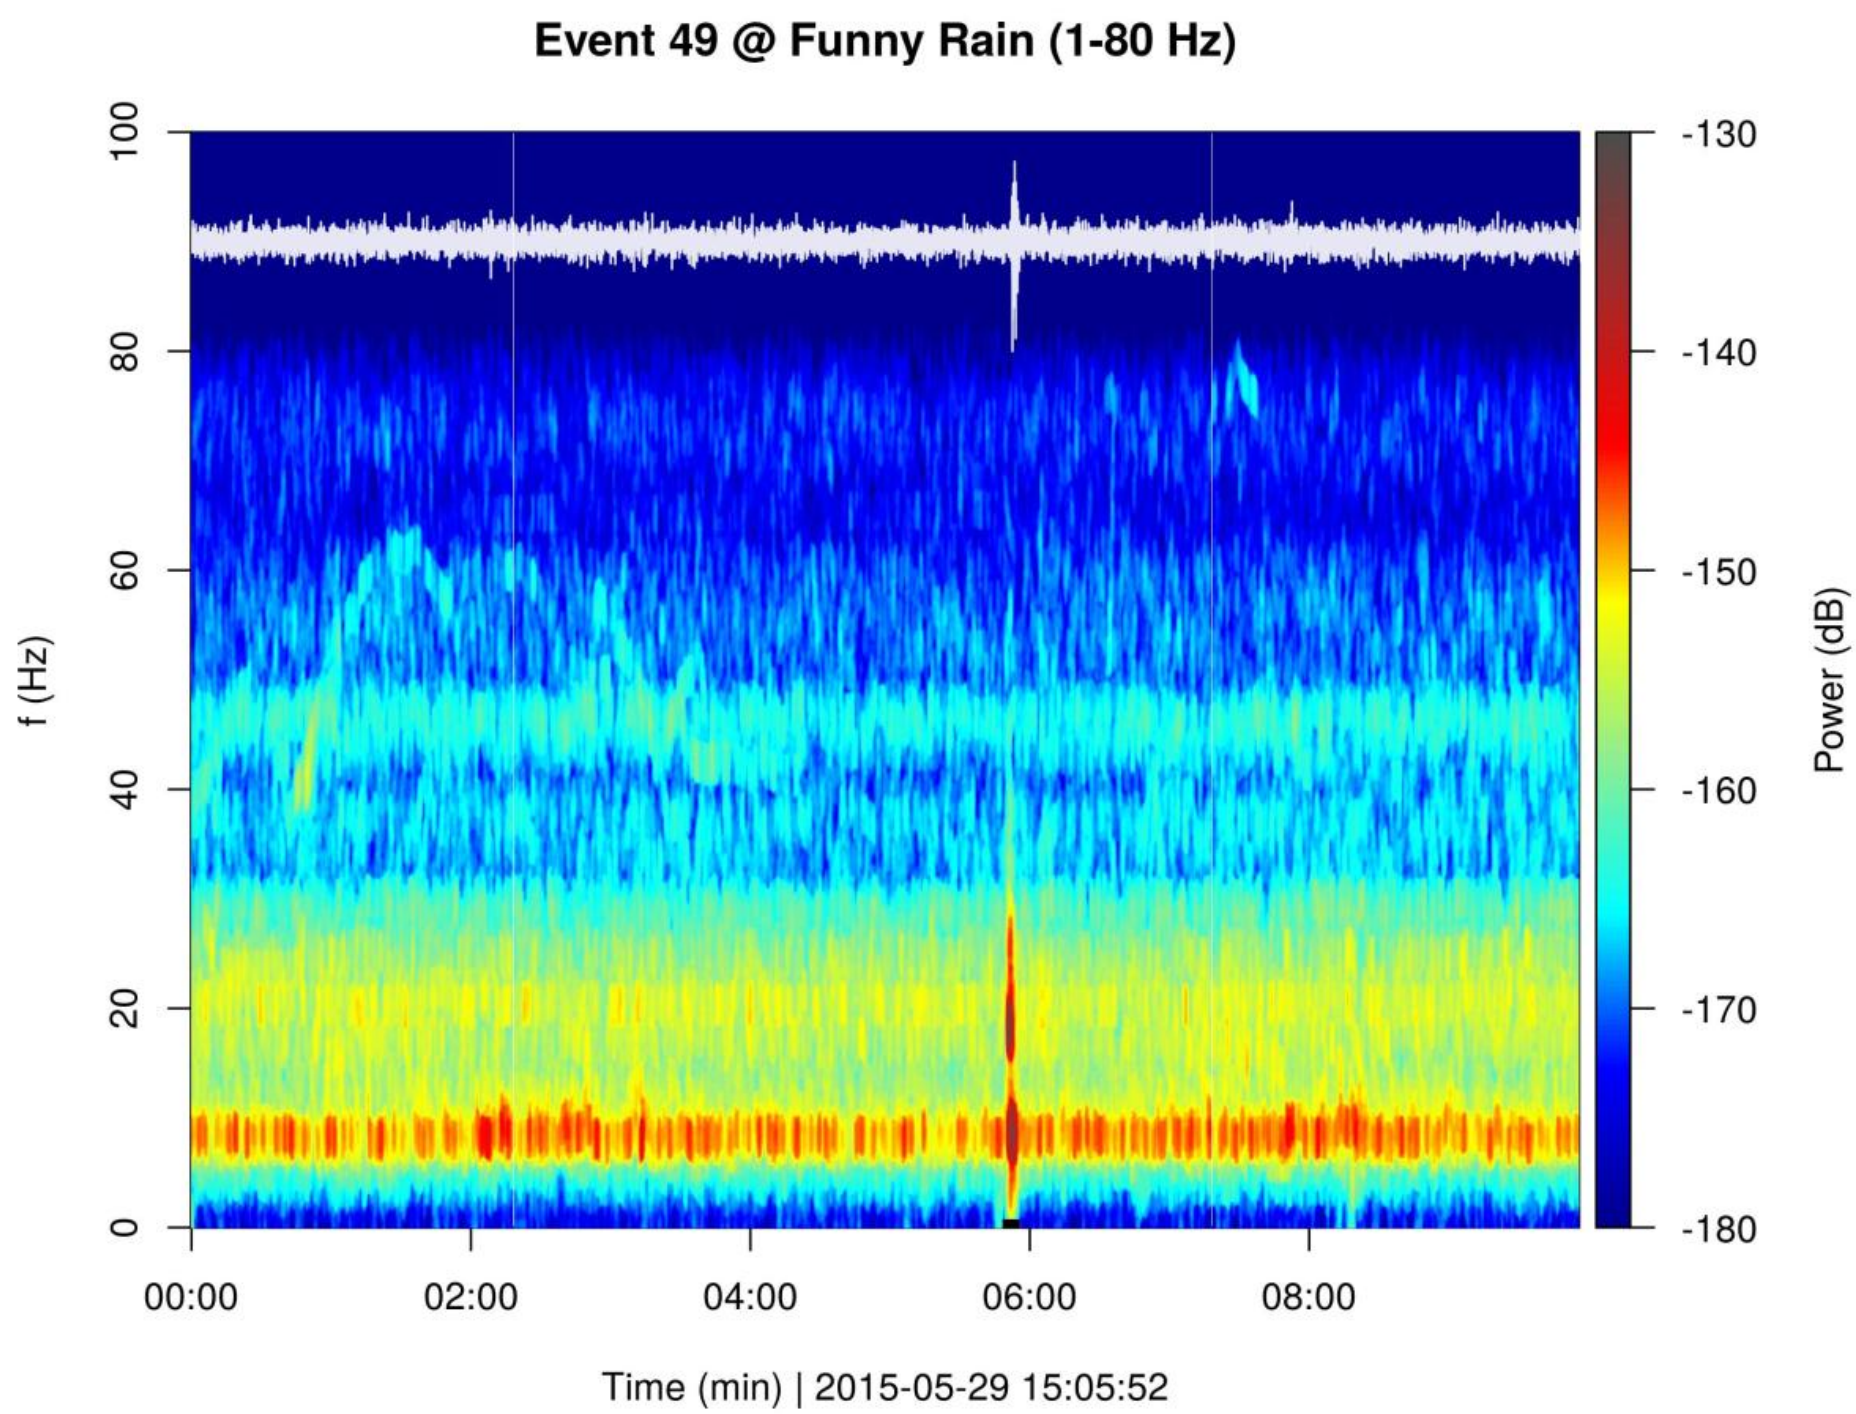

Figure 50:
